# Supplementary material for: Complete Genomic Structure of the Cultivated Rice Endophyte Azospirillum sp. B510
Source: PubMed Central journal article supplement — DNA Res. 2010 Jan 4;17(1):37–50. doi: 10.1093/dnares/dsp026 (PMC2818188; doi:10.1093/dnares/dsp026), 2010-01-04
Supplement: dsp026_1.pdf [file dsp026_1.pdf]

Supplementary Figure 1. Phylogenetic tree based on 16S rRNA gene sequences of the genus *Azospirillum*. The tree was constructed using the neighbor-joining method. The bar indicates 0.01 nucleotide substitutions per 100 bp. Strain B510 is shown in bold letters. GenBank accession numbers for the nucleotide sequences are provided in parentheses.

Supplementary Figure 2. Gene maps of the seven replicons of *Azospirillum* sp. B510. Gene arrangements are shown on the seven gene maps, at the same scale. Green bars indicate 3-kb-long segments, with numerals in kb on the ends of the bars. On both sides of the scale bars, boxes with gene identification codes indicate the potential genes assigned based on computer predictions. Each arrowhead indicates the direction of translation. Predicted protein genes for which functions could be evaluated by similarity search are classified into 25 functional categories, as indicated by different color codes bottom of the figures. RNA-encoding genes are represented by black bars and boxes with red letters. Nine of the rRNA gene clusters are numbered. The sequences and gene information presented in this paper are available in RhizoBase (<http://genome.kazusa.or.jp/rhizobase>).

Supplementary Figure 3. Cumulative plot of KOPS motifs in the B510 genome. The cumulative distribution of the GGGNAGGG sequence was calculated for the seven replicons, and is plotted on the Y axes. We searched for the KOPS motif (F, forward strand; R, reverse strand) in 1-kb windows.

Supplementary Figure 4. The CRISPR locus on the B510 genome. A self-comparison of the B510 genome by GenomeMatcher (A and B) and the structure of CRISPR (Clustered Regularly Interspaced Short Palindromic Repeat) systems (C). (A) Overall self-comparison of the B510 genome. (B) Magnification of genomic regions with a high density of repeated sequences. (C) CRISPRs in the B510 genome were composed of 70 different spacers (of 36-42 bp) and an identical repeat element (of 37 bp) containing an 8-bp palindrome (5'-CCTGGGCG) at the coordinates 3,158,606-3,163,849 on the chromosome, and are preceded by two *cas* genes and a lead sequence (LDR).

Supplementary Figure 5. Sequence alignment of the repeated units in the CRISPR system on the B510 chromosome. A sequence unit for CRISPR consists of a repeat element and a spacer. Yellow shading indicates repeated sequences, and the other colors indicate spacers with distinct sequences. The number above each nucleotide sequence indicates the starting position of the repeat unit on the B510 chromosome, in bp.

Supplementary Figure 6. Predicted tRNA structures of *Azospirillum* sp. B510. The nucleotide sequences of 79 tRNA genes and their structural domains are shown. The loci on the replicons are indicated in parentheses.

Supplementary Figure 7. Comparison of the configuration of rRNA gene clusters (*rrns*). The identification of the *rrn* cluster is depicted in “Supplementary Figure 2”. Boxes on horizontal lines represent arrangements of the RNA genes in the cluster. The broken lines show truncated parts of the *rrn* cluster. The *rrn* clusters are classified into three groups based on variations in their arrangements.

Supplementary Figure 8. The nucleotide sequences of *acdS* and *acdR* in *Azospirillum* sp. B510. The *acdS* and *acdR* genes are indicated with red and blue arrows, respectively, and the direction of the arrows denotes the direction of transcription. The box indicates a putative LRP protein-binding site (A/T rich region) with a palindrome (black arrow), which is similar to that of *Enterobacter cloacae* (Glichko and Glick, 2000).

Glichko, V. P., and Glick, B. R. 2000, Identification of DNA sequences that regulate the expression of the *Enterobacter cloacae* UW4 1-aminocyclopropane-1-carboxylic acid deaminase gene. *Can. J. Microbiol.*, **46**, 1159-1165.

Supplementary Figure 9. Phylogenetic tree of malic enzymes produced by the plant-associated bacteria. This tree was built via the neighbor-joining method. Gene products for the malic enzymes are shown with IDs from the genomic data, as follows: AZL000200, AZLa05660, AZLa08520: *Azospirillum* sp. B510; AZC\_0119, AZC\_3656: *Azorhizobium caulinodans* ORS571; BBta\_3876, BBta\_5810: *Bradyrhizobium* sp.

BTai1; BRADO3367, BRADO5322: *Bradyrhizobium* sp. ORS278; GKPORF\_B0937, GKPORF\_B1530, GKPORF\_B2116: *Klebsiella pneumoniae* Kp342; NGR\_c00300, NGR\_c16880: *Rhizobium* sp. NGR234; RHE\_CH00389, RHE\_CH02355: *Rhizobium etli* CFN42; RL0407, RL2671: *Rhizobium leguminosarum* bv. *viciae* 3841; SMc00169, SMc01126: *Sinorhizobium meliloti* 1021; azo0821, azo3211: *Azoarcus* sp. BH72; bll6469, blr3726, blr4145: *Bradyrhizobium japonicum* USDA110; and mlr0809, mlr5329: *Mesorhizobium loti* MAFF303099.

Supplementary Figure 10. Comparison of the pRhico-plasmid and B510-genome sequences. The pRhico plasmid is presented at the top of the figure, with contigs 1 to 5 arranged in numerical order. The B510 genome is shown at the bottom of the figures, with genomic elements arranged in the following order: chromosome, pAB510a, pAB510b, pAB510c, pAB510d, pAB510e, and pAB510f. The B510 chromosome and plasmid sequences are drawn laid end-to-end in the figure. These sequences were analyzed using the blastn function of the GenomeMatcher V.1.270. The BLAST E-value of  $10^{-10}$  was considered significant for the assignments. A red line linking the top to the bottom represents a match between pRhico and the region encoding the replication protein for pAB510f. Blue lines indicate genes involved in cell envelope biosynthesis and outer membrane constitution. Yellow lines link regions encoding tRNA. Green bars indicate a putative transposase encoded in IS. Pale brown bars indicate other matches.

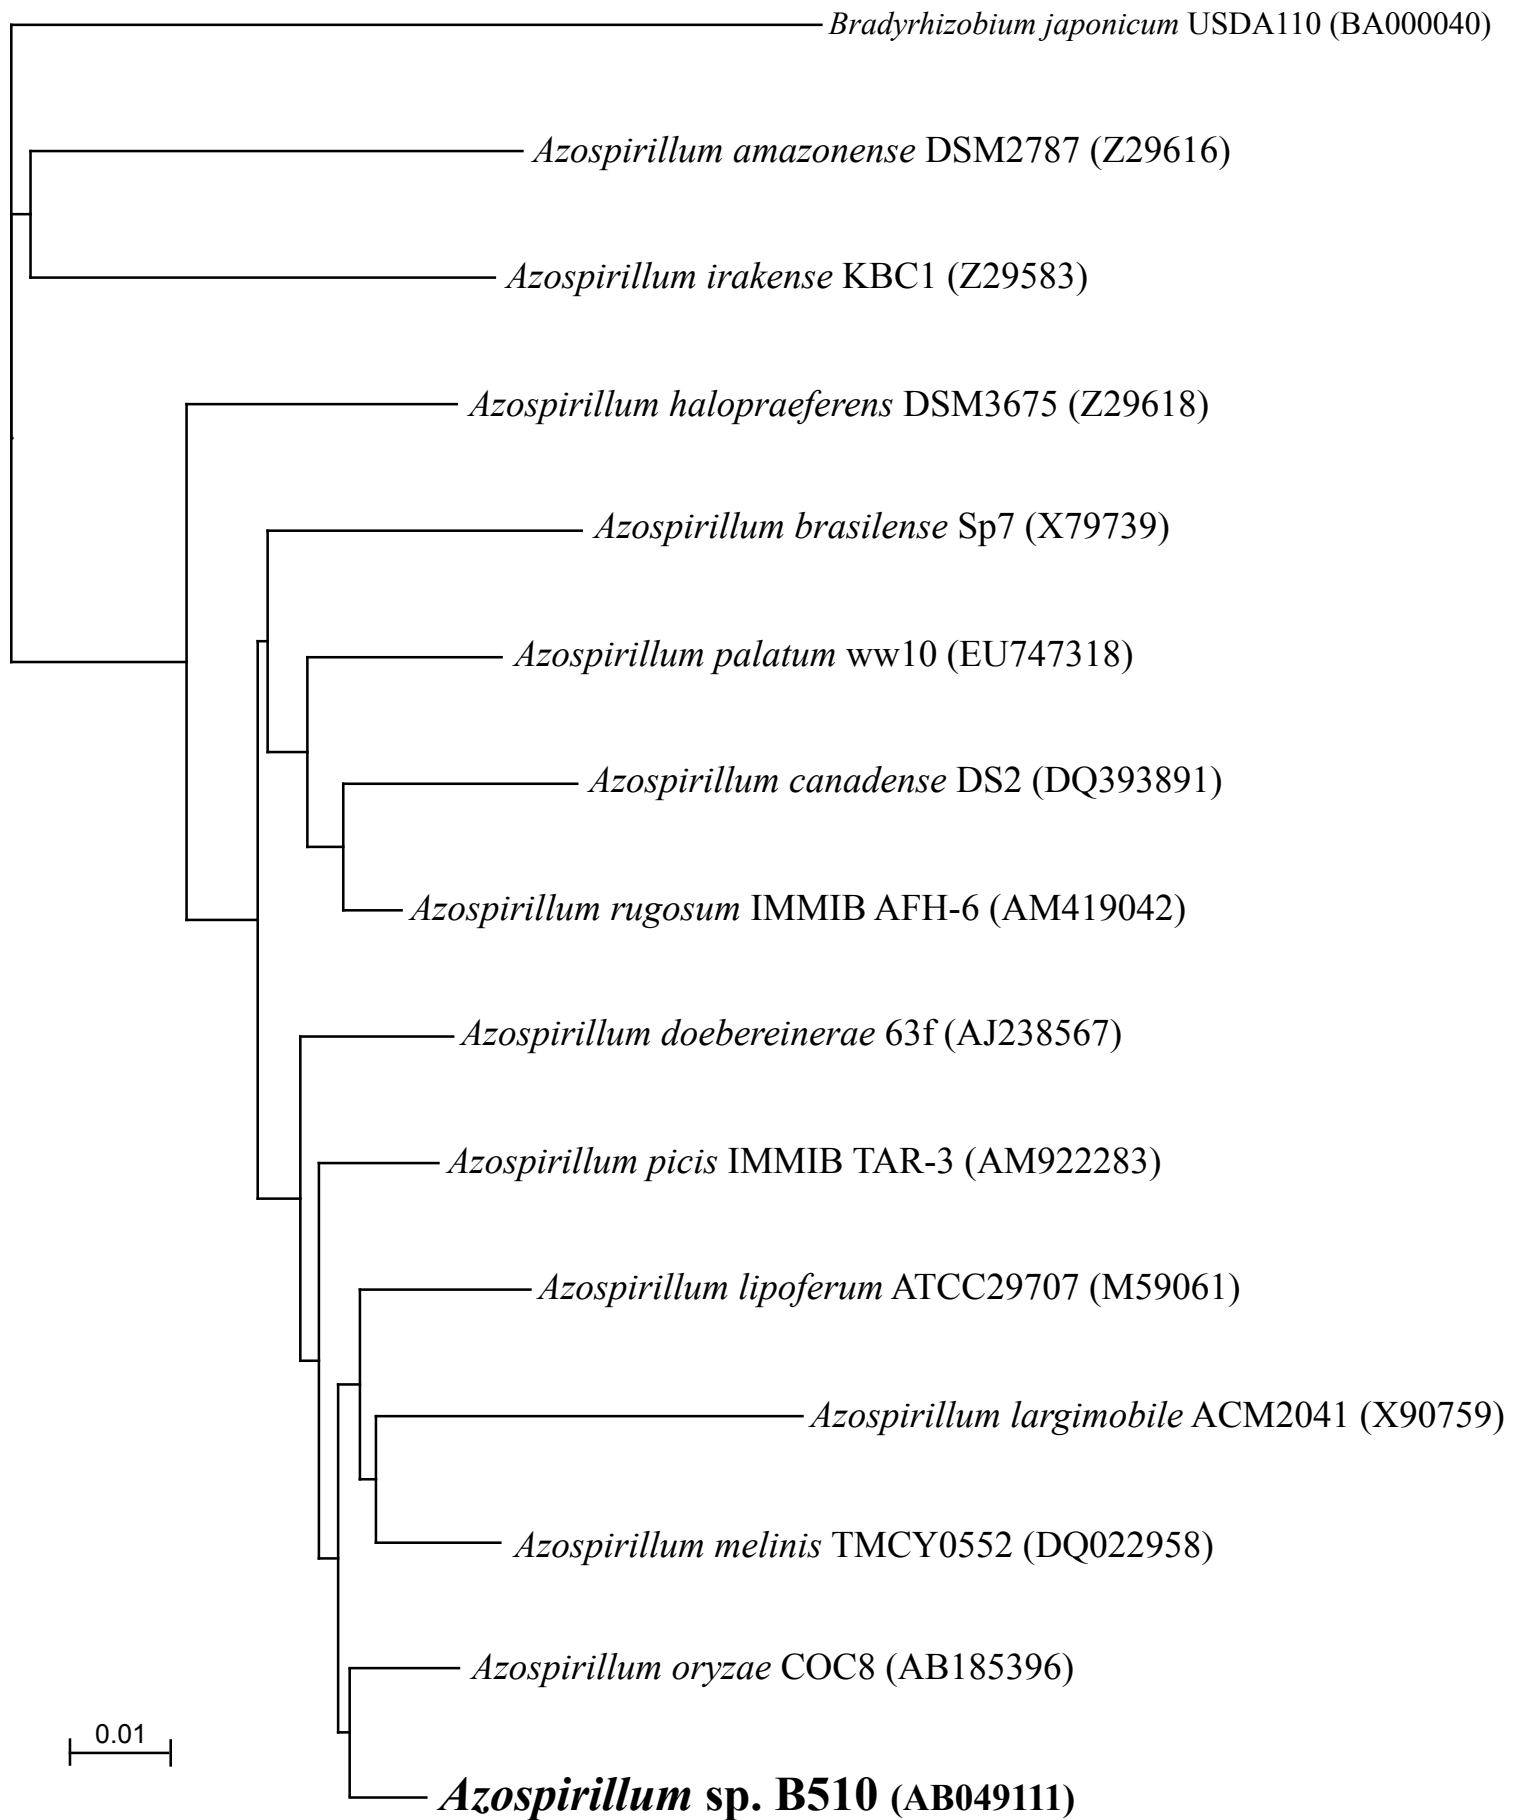

Supplementary Figure 1

# chromosome

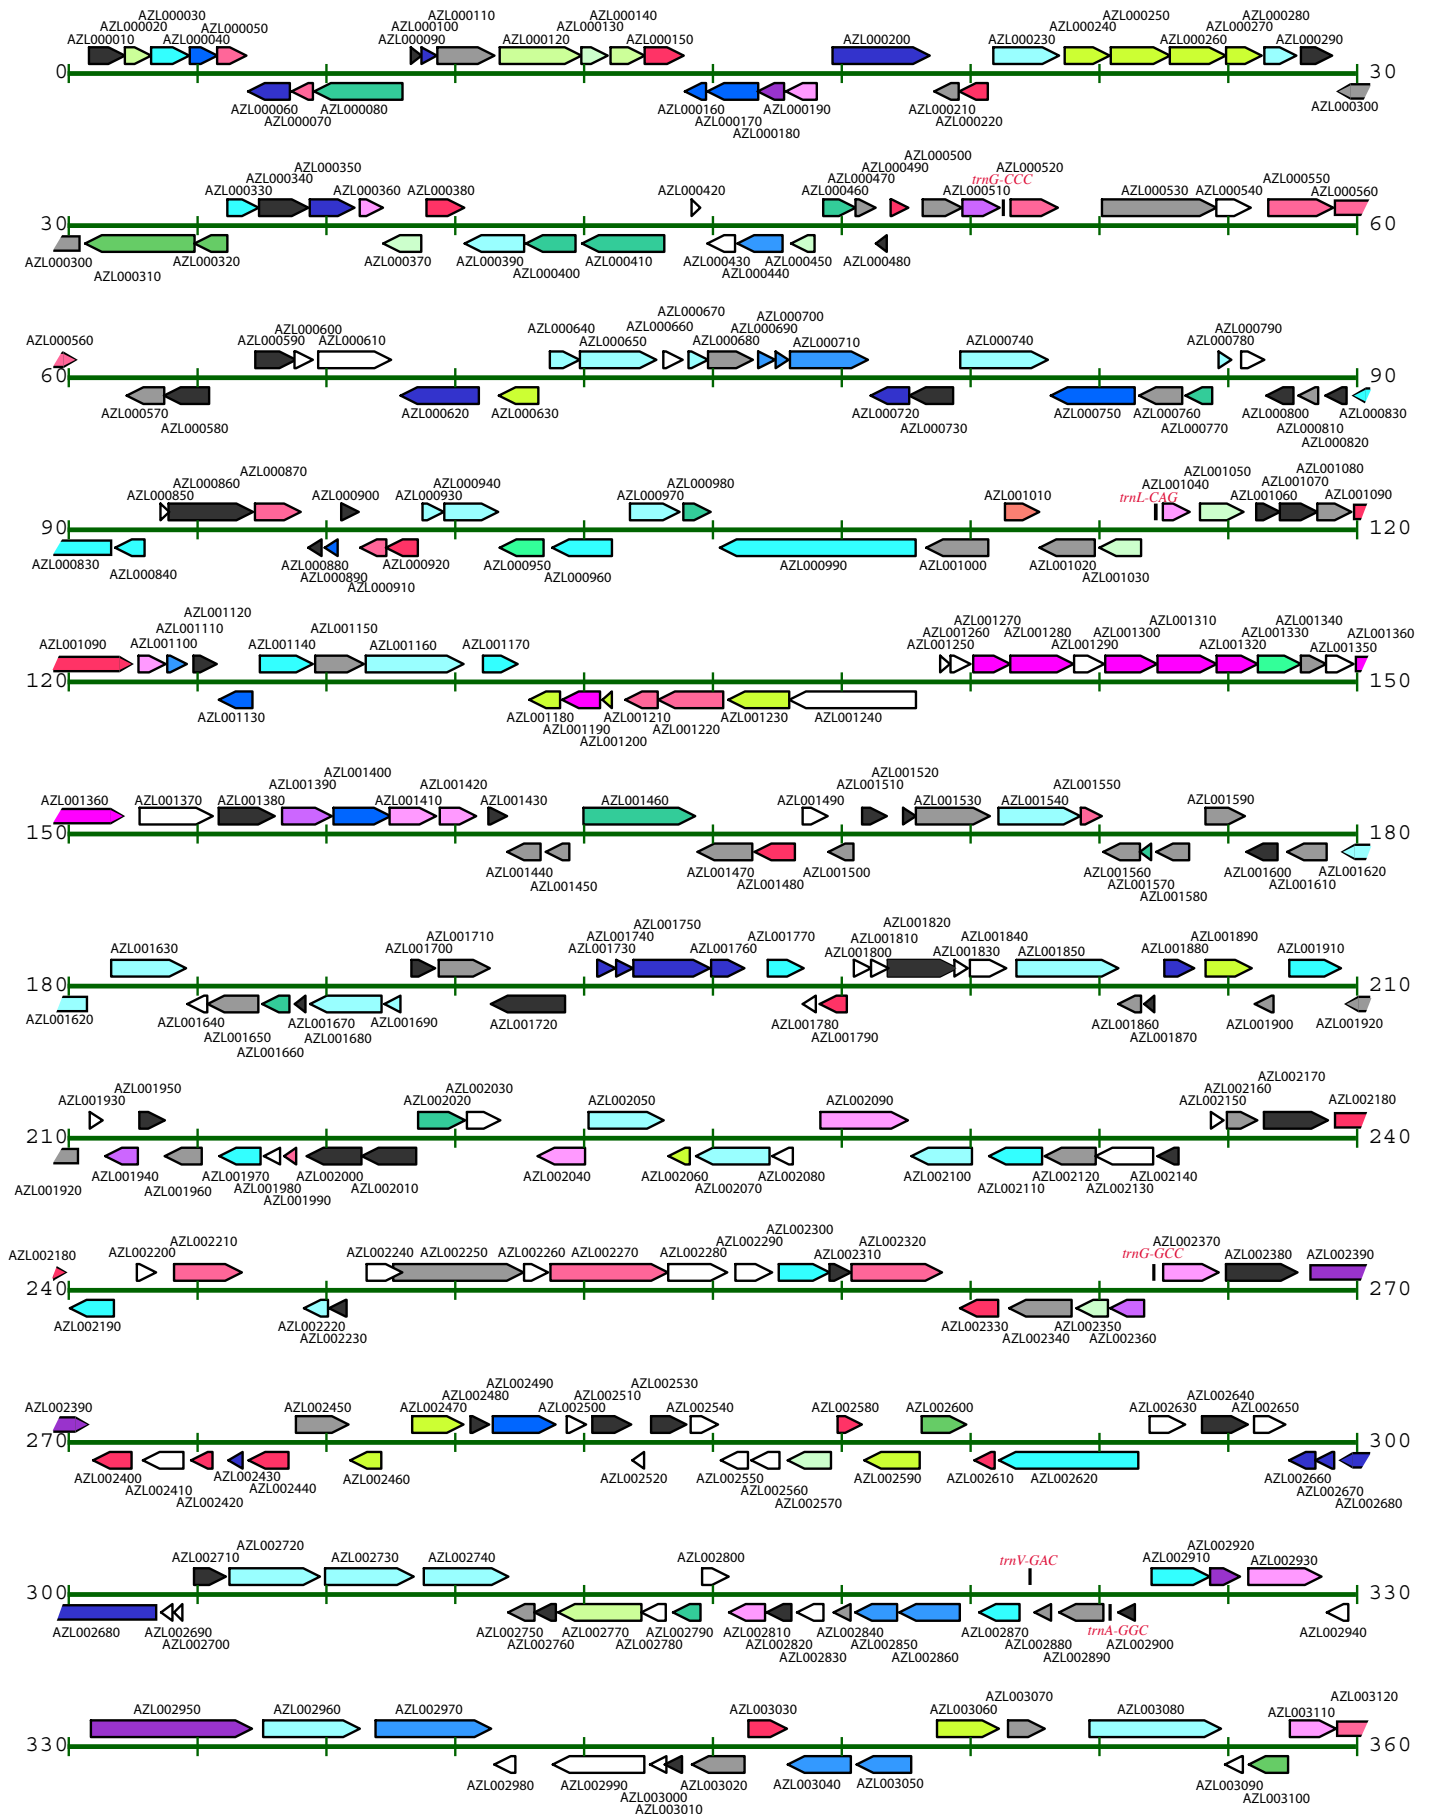

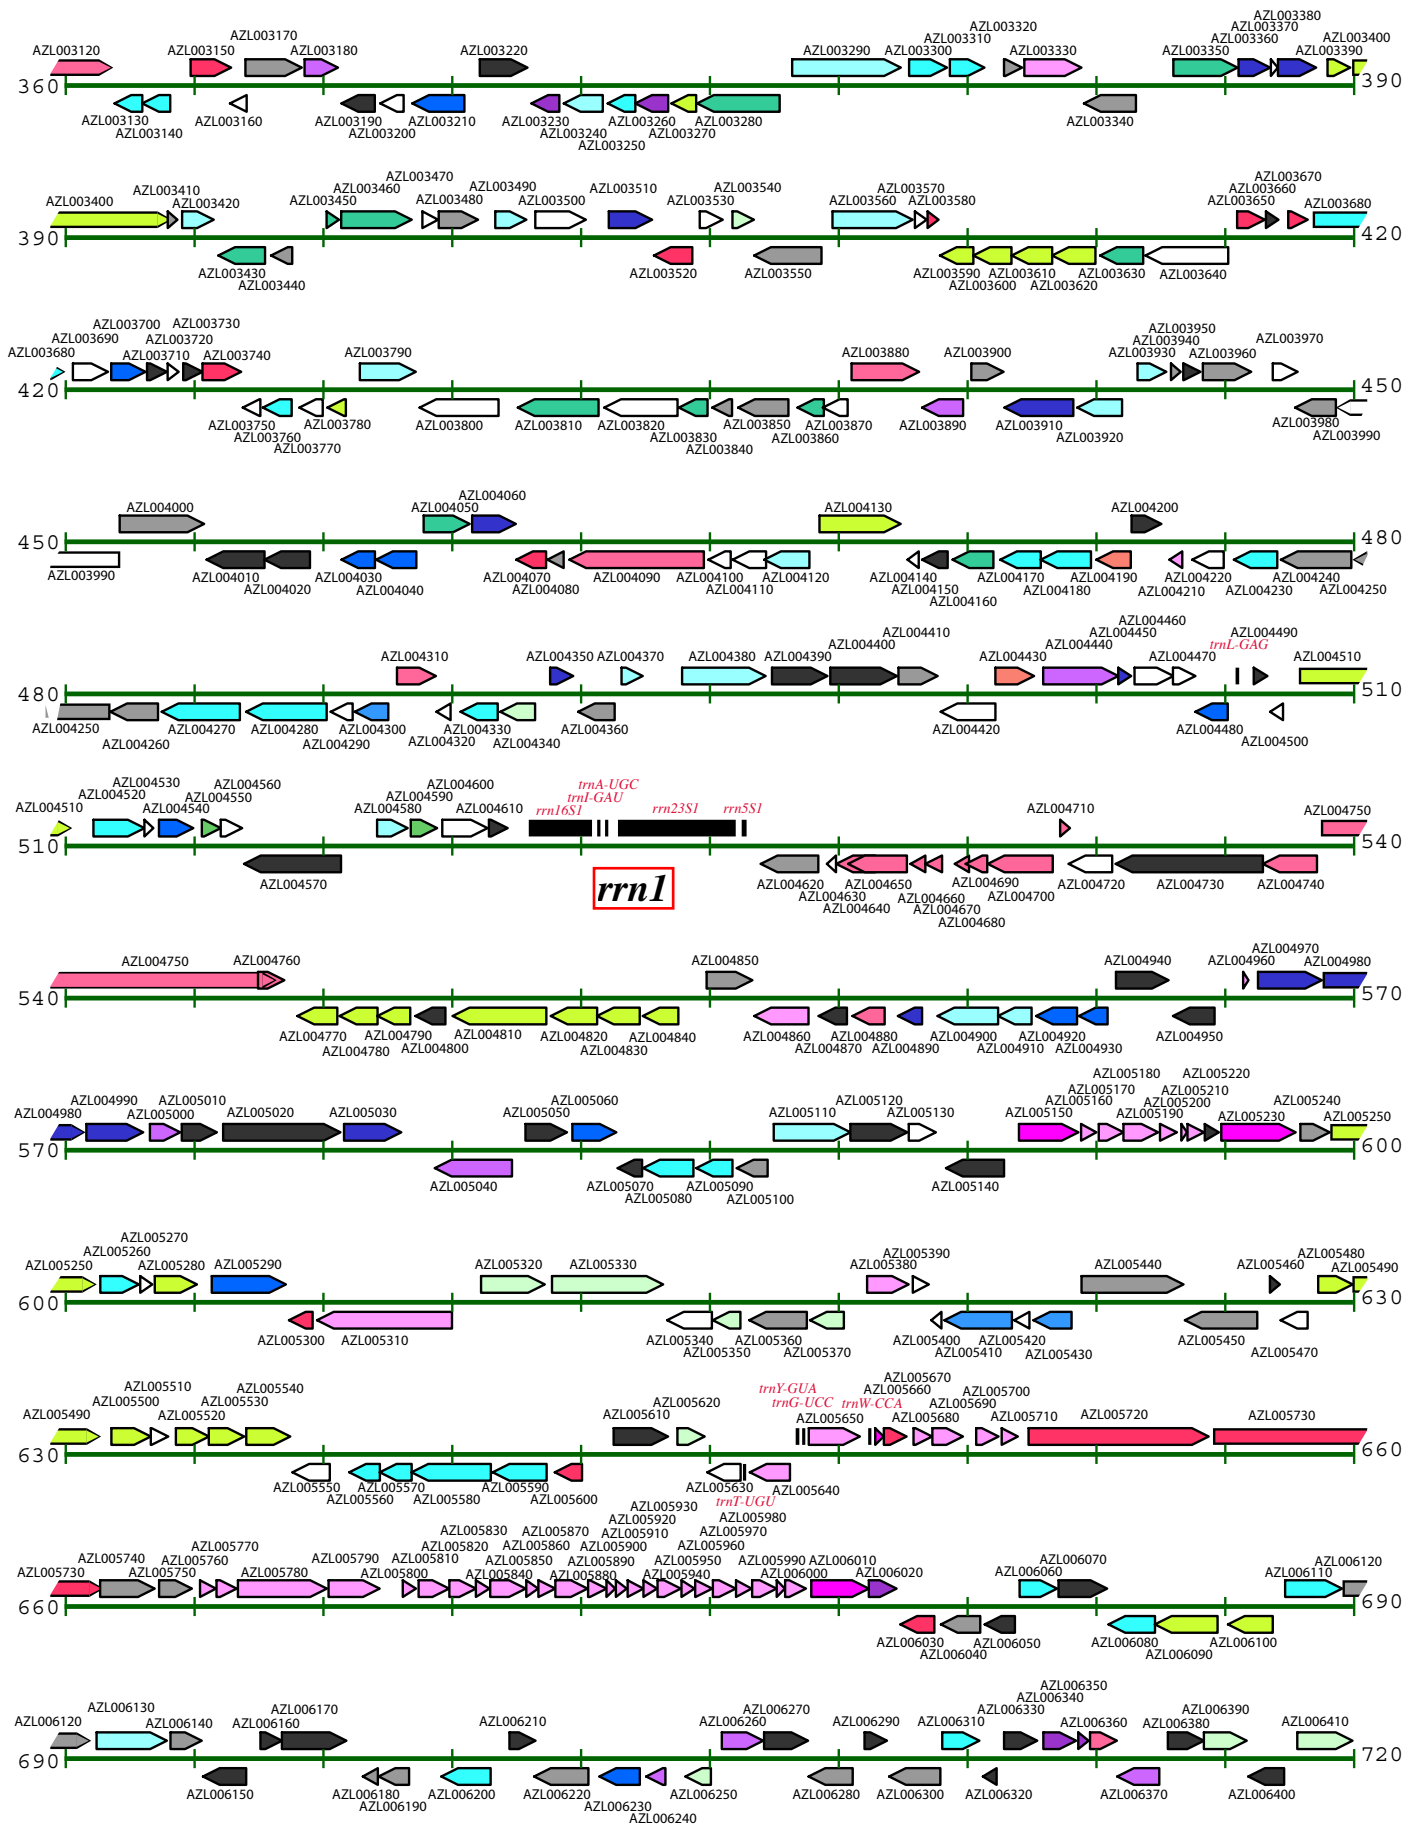

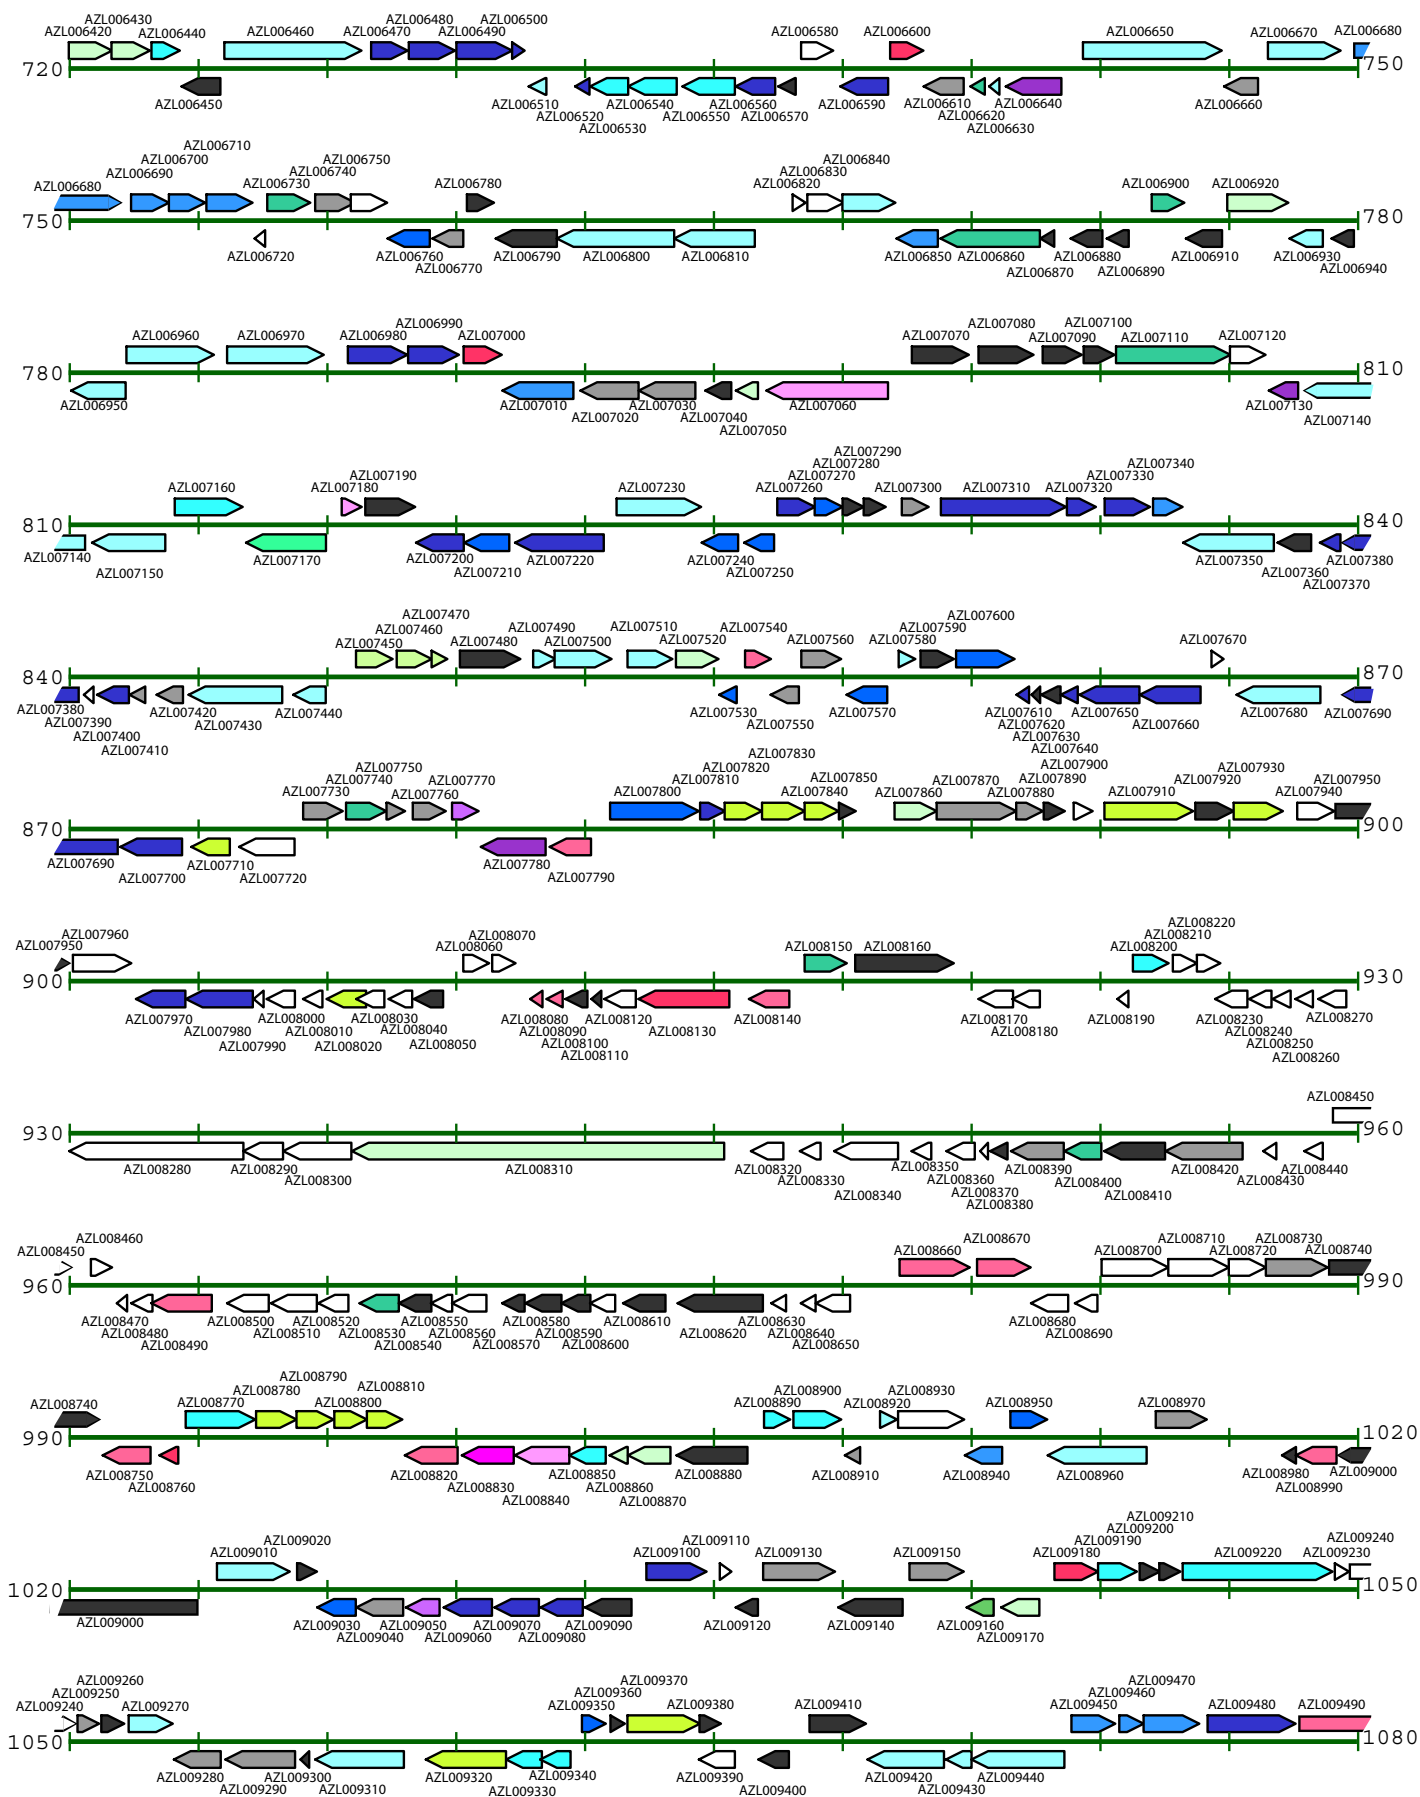

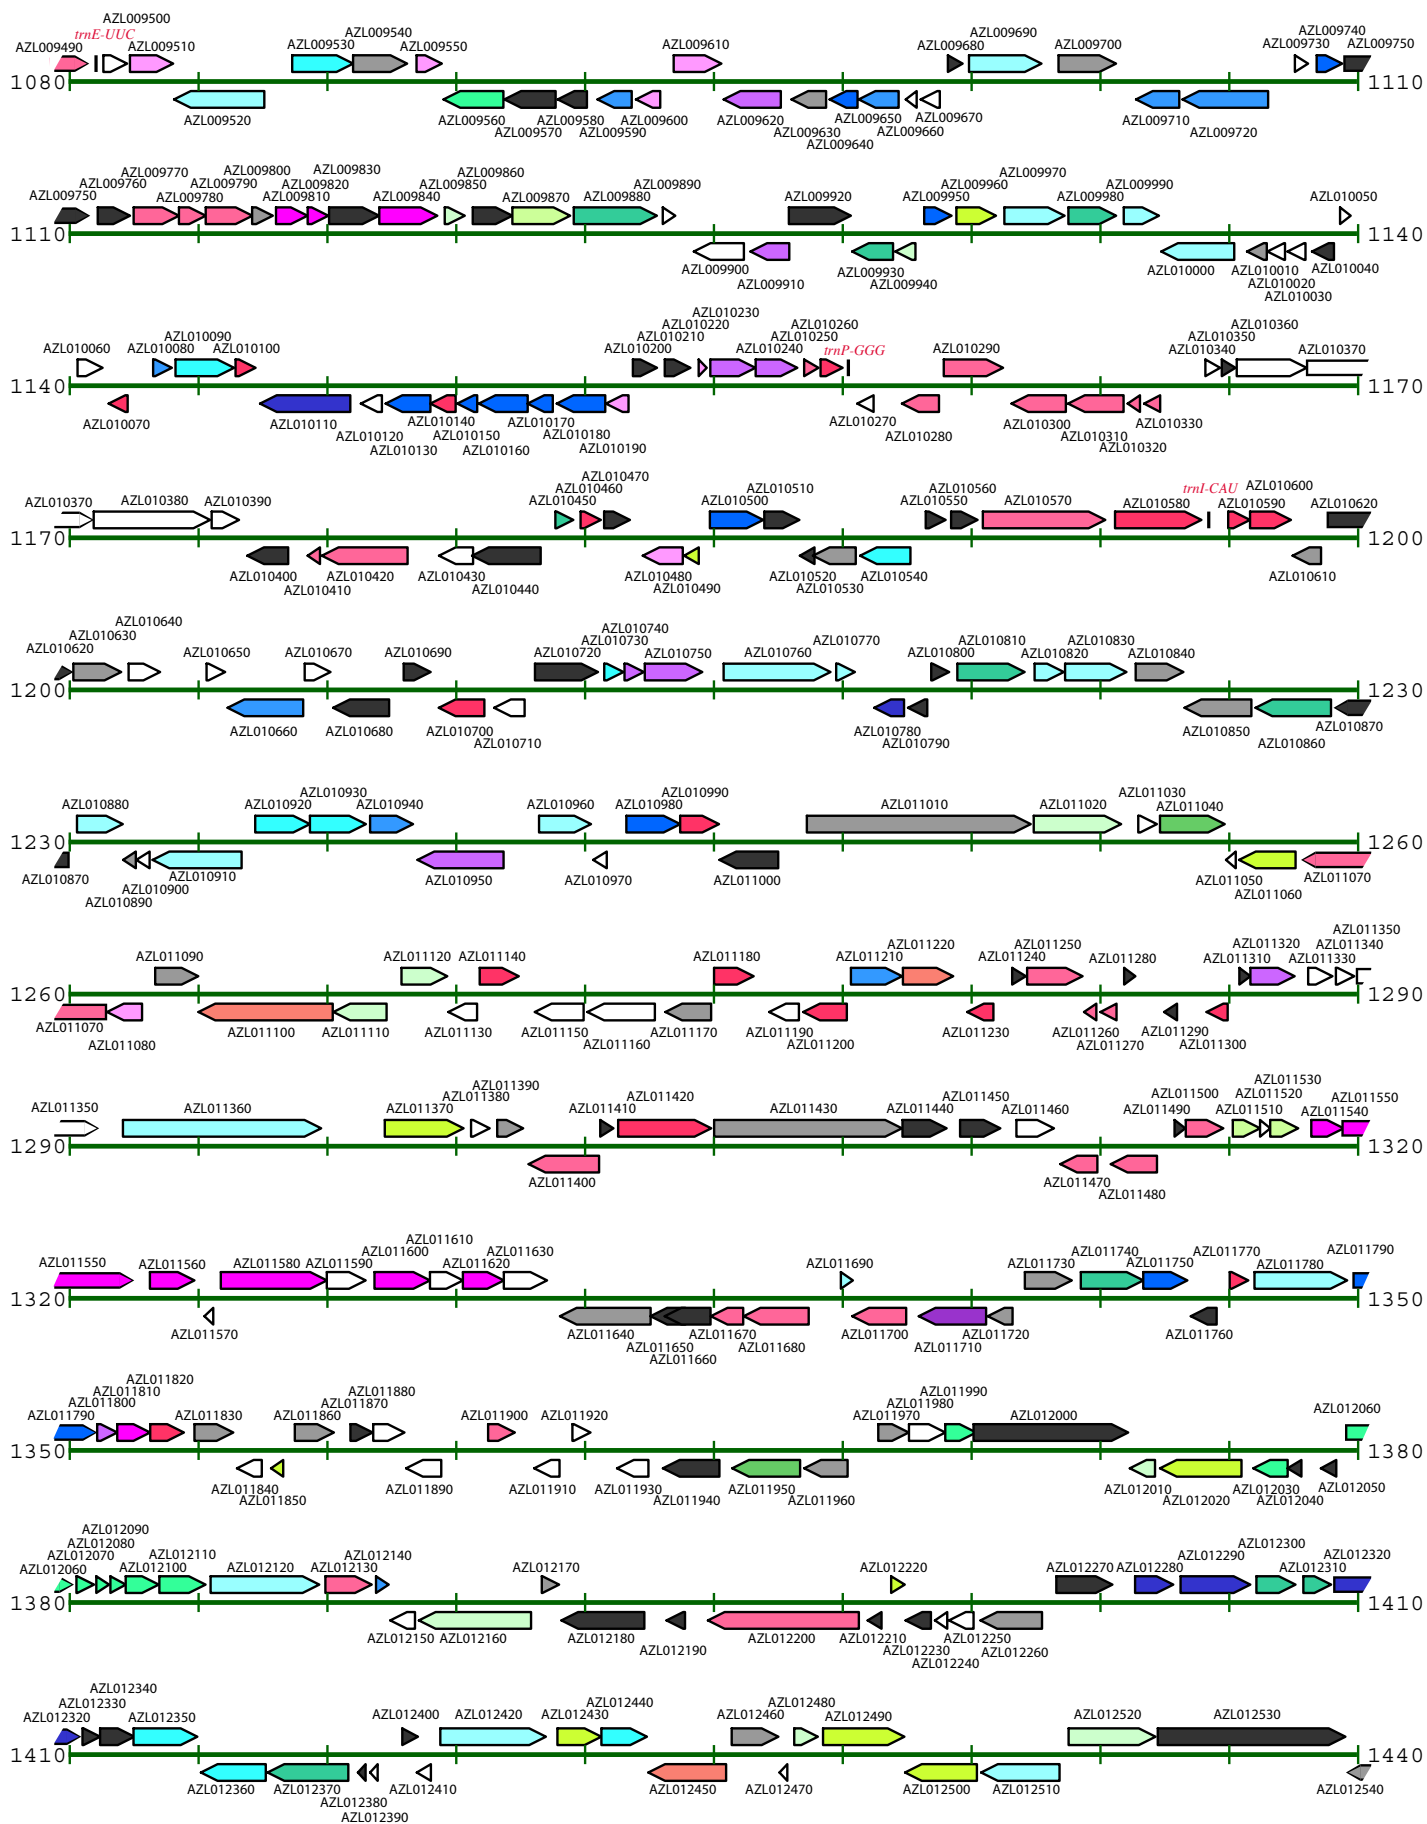





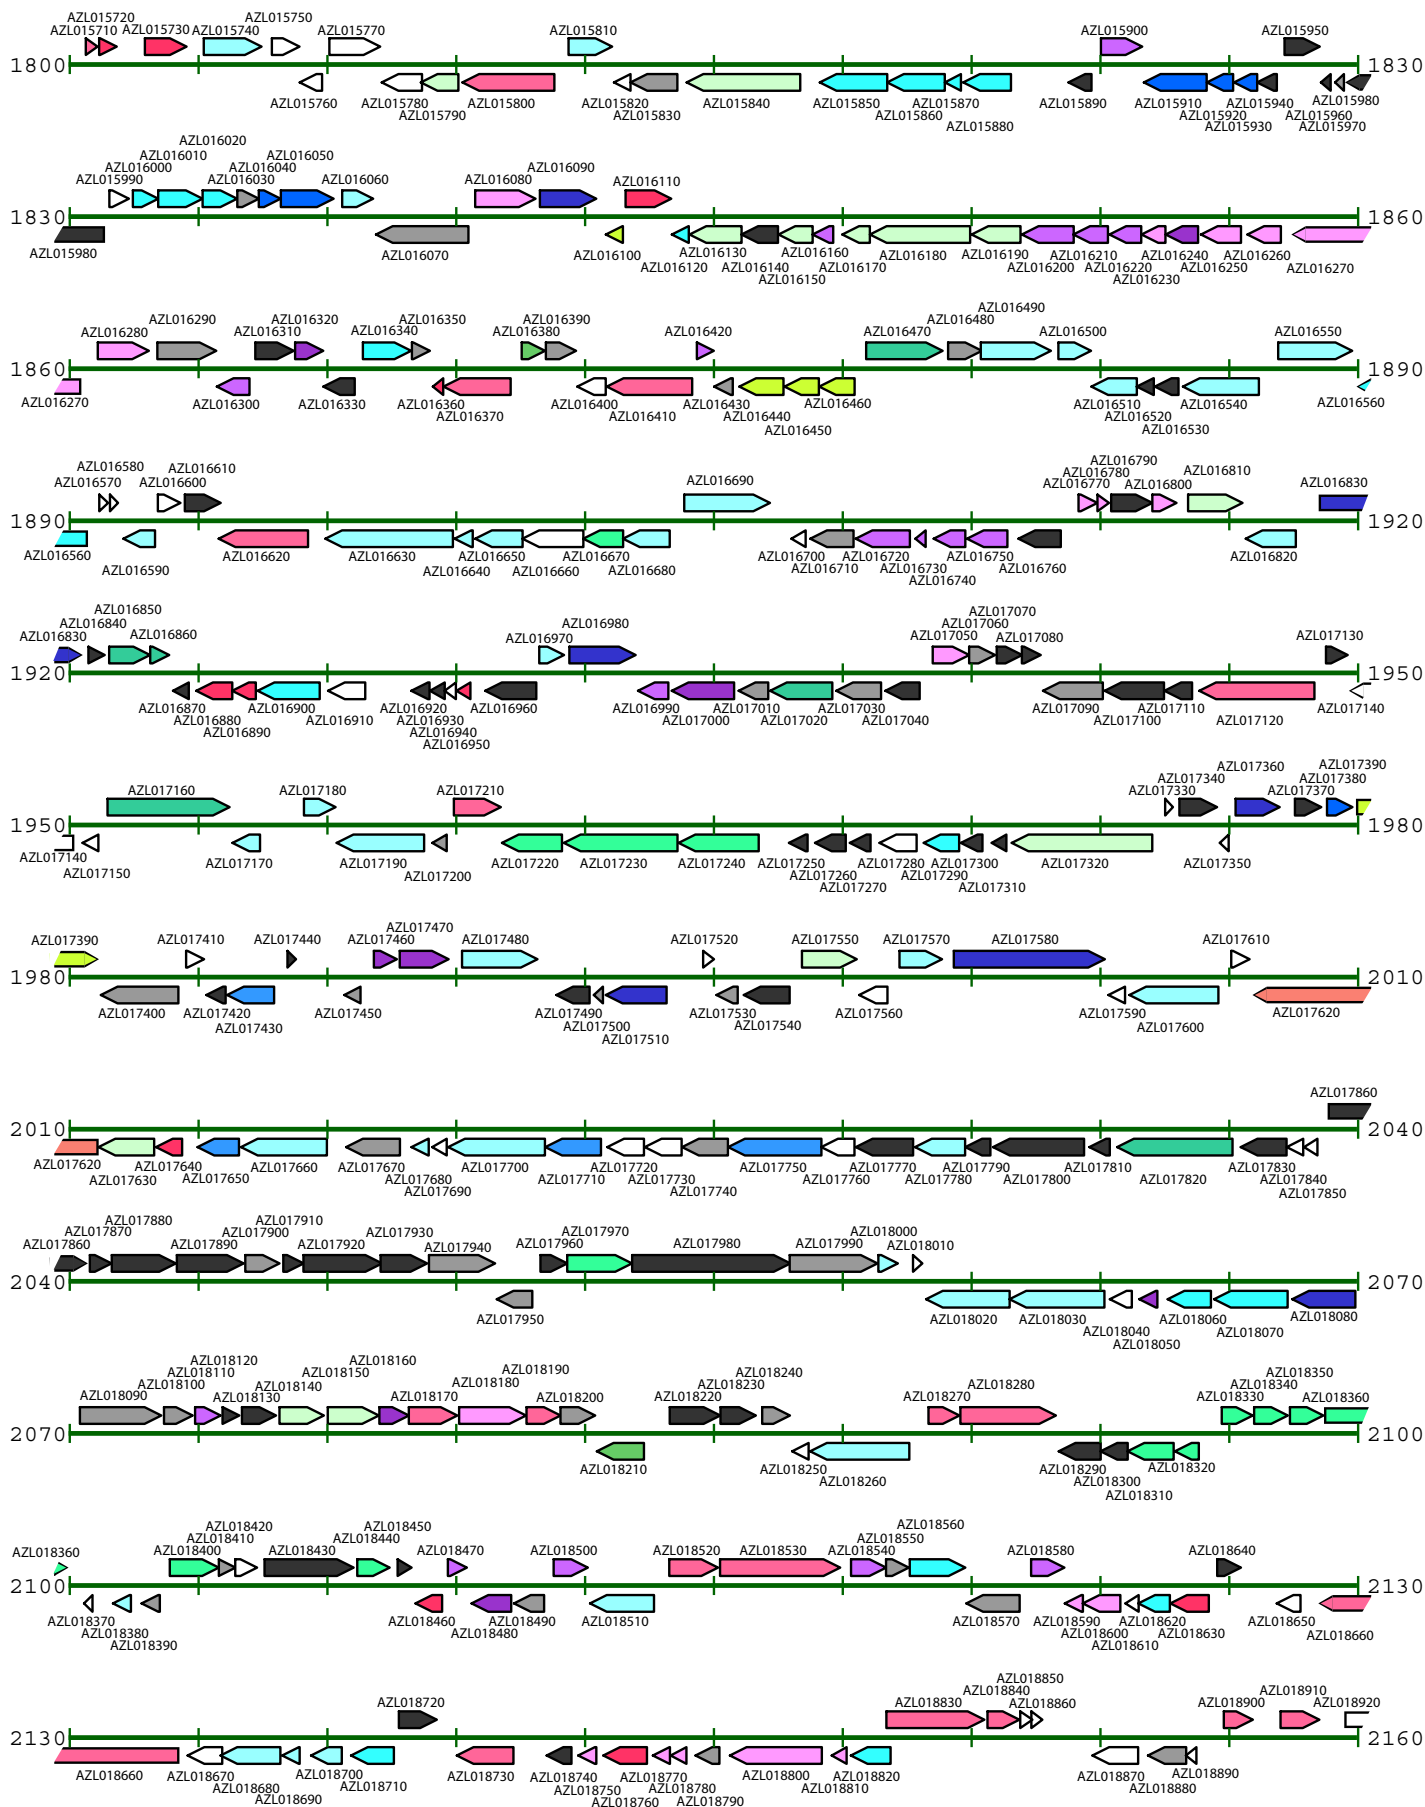

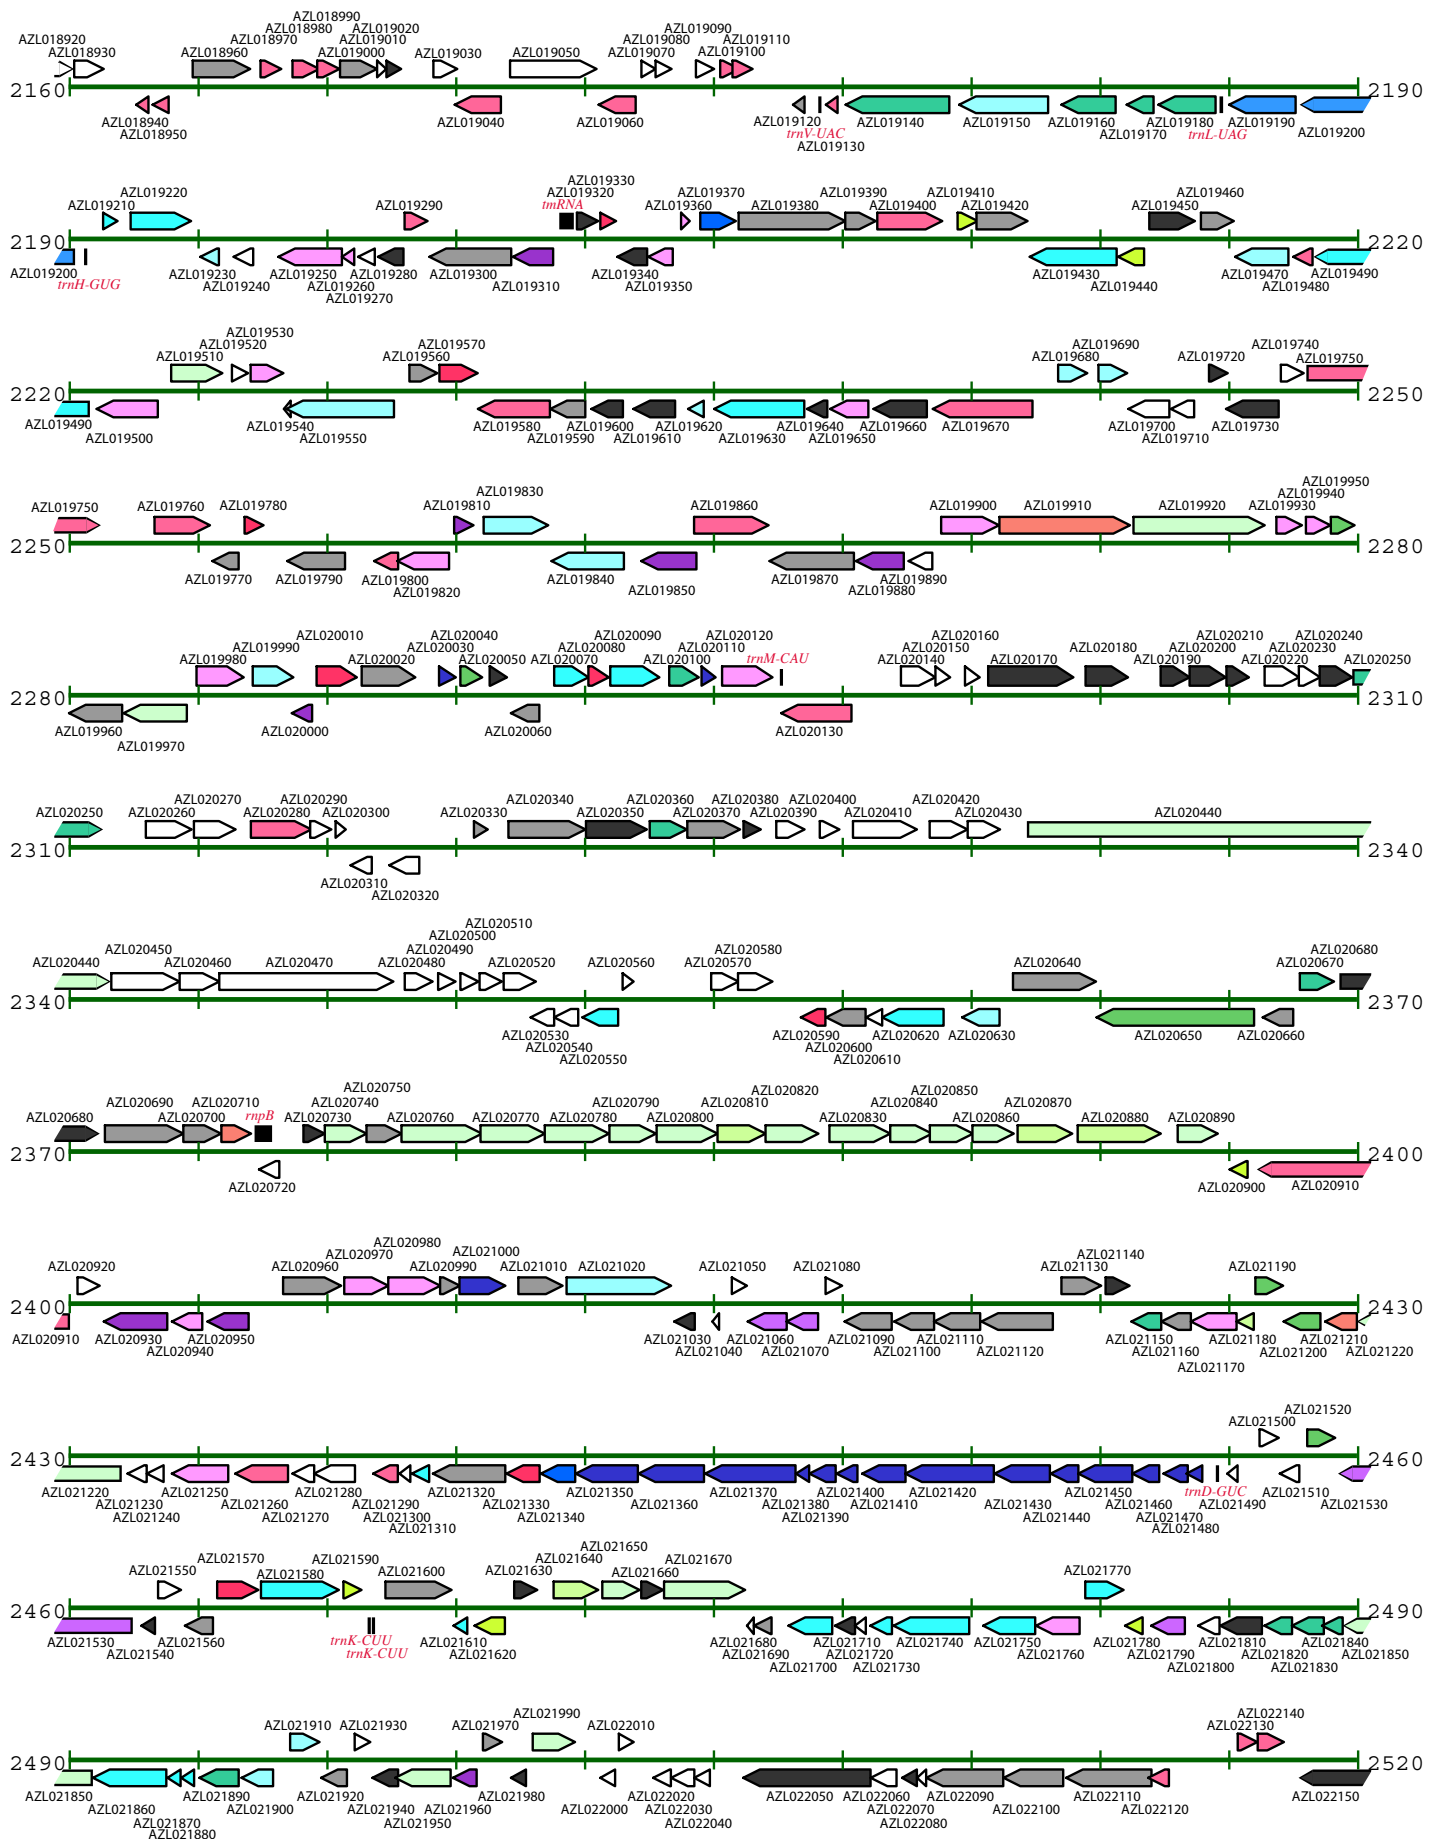



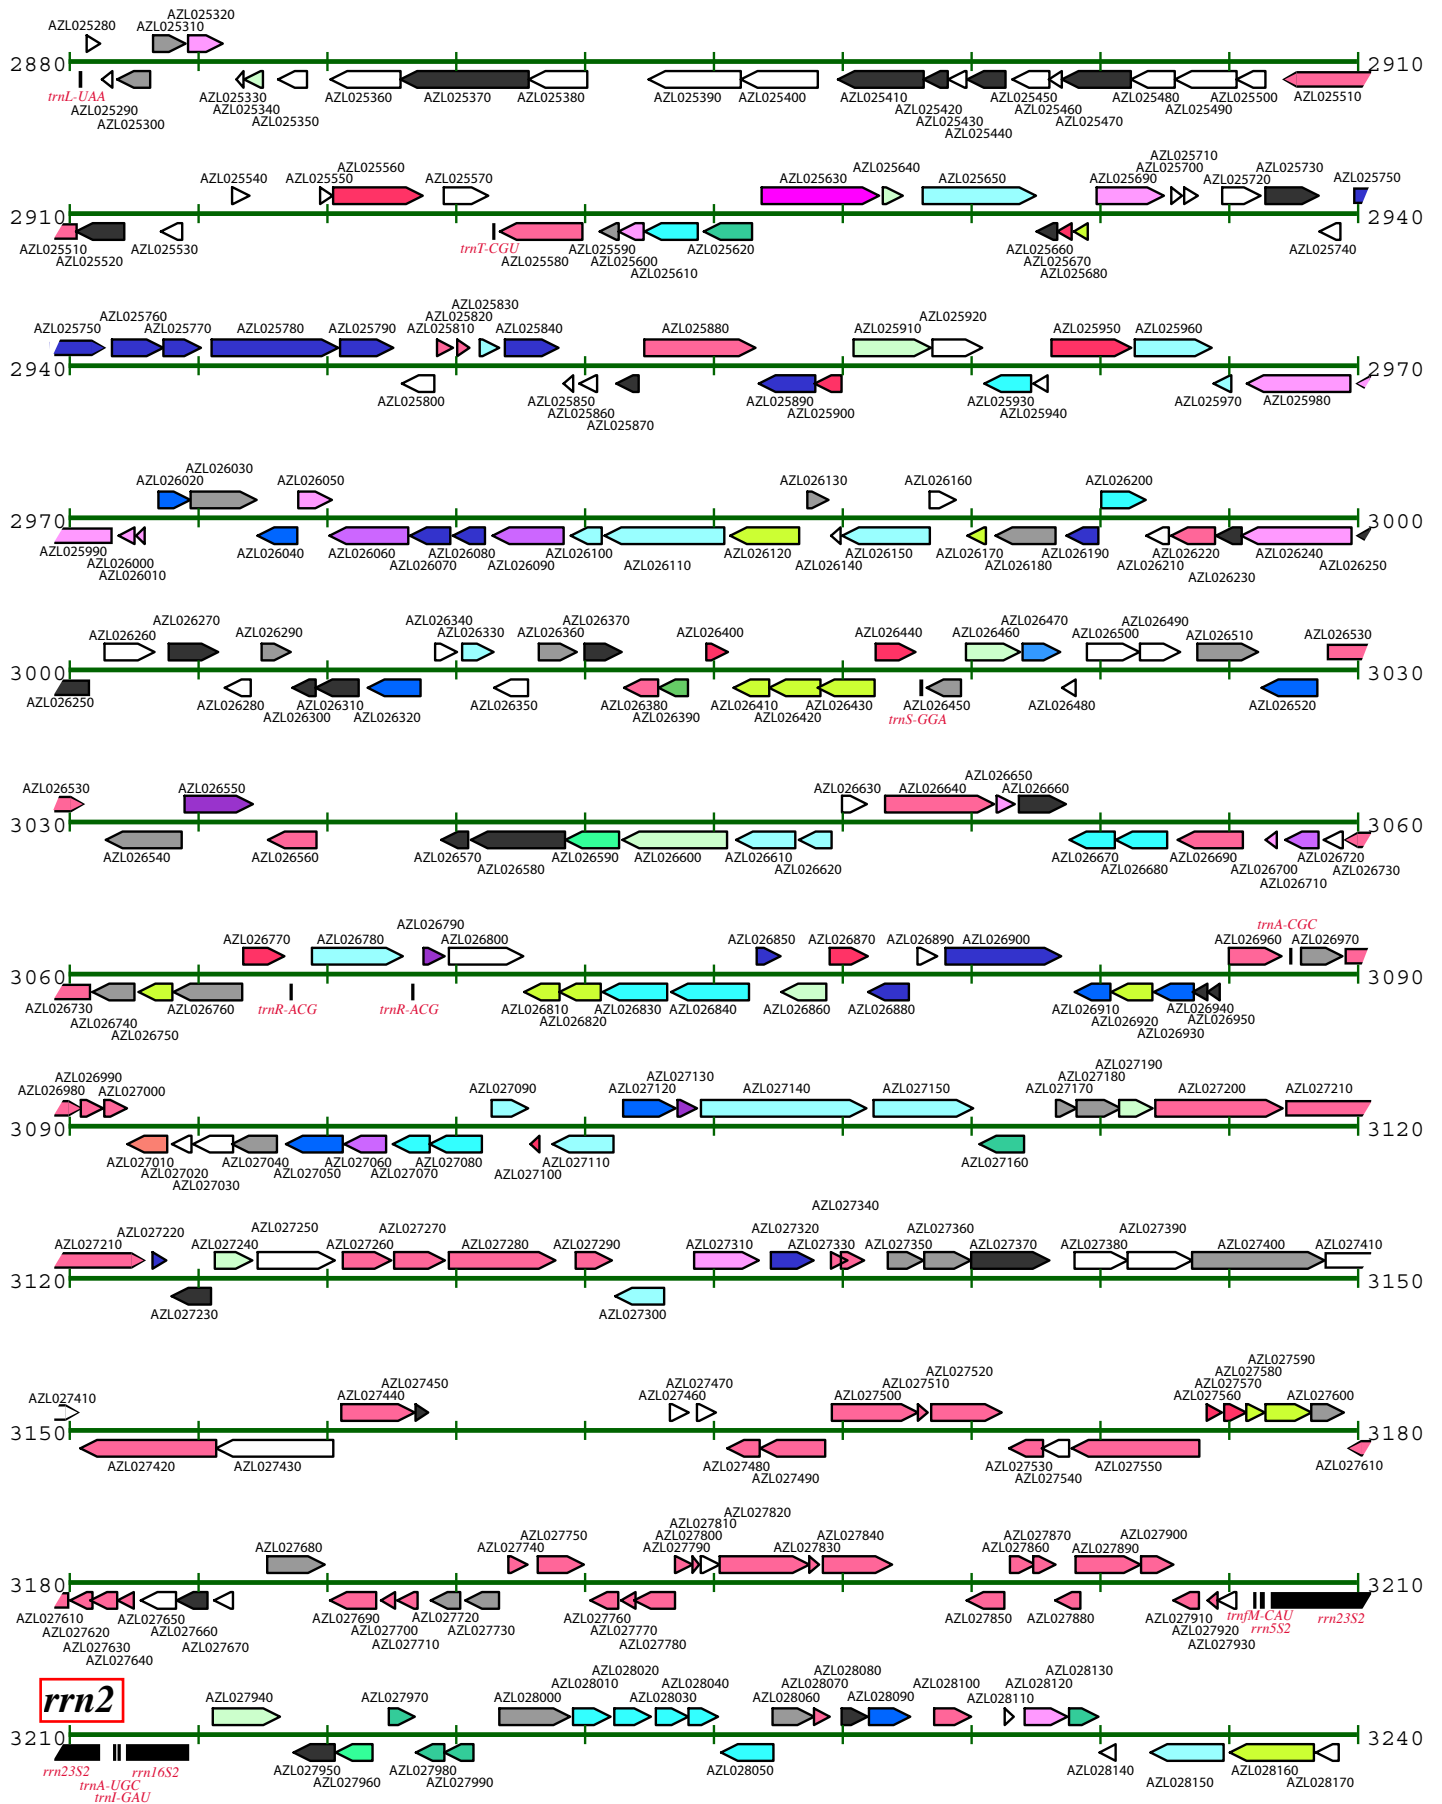

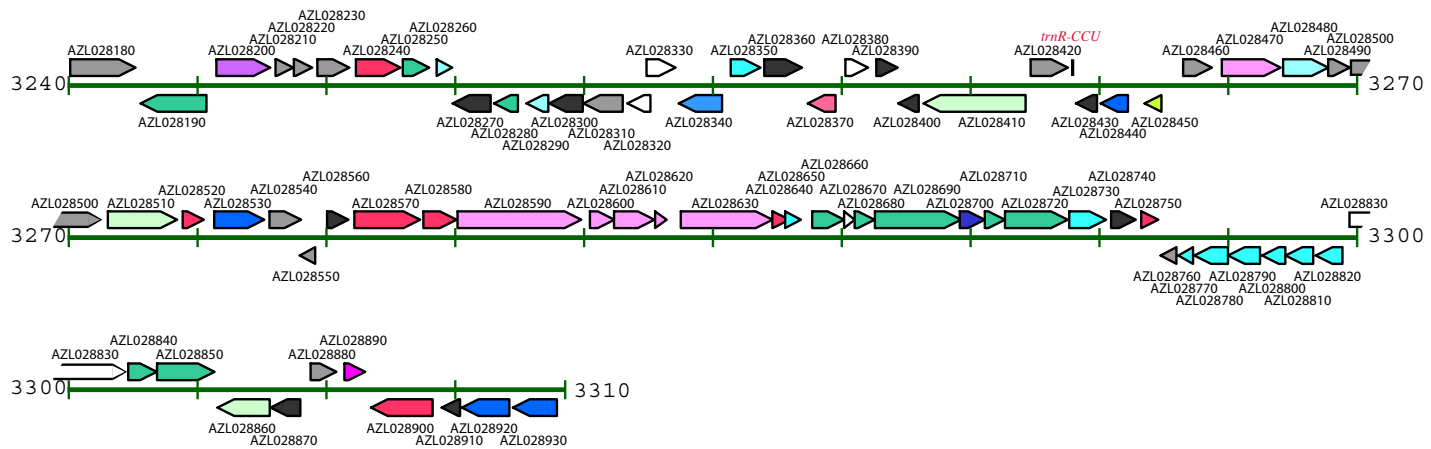

# pAB510a

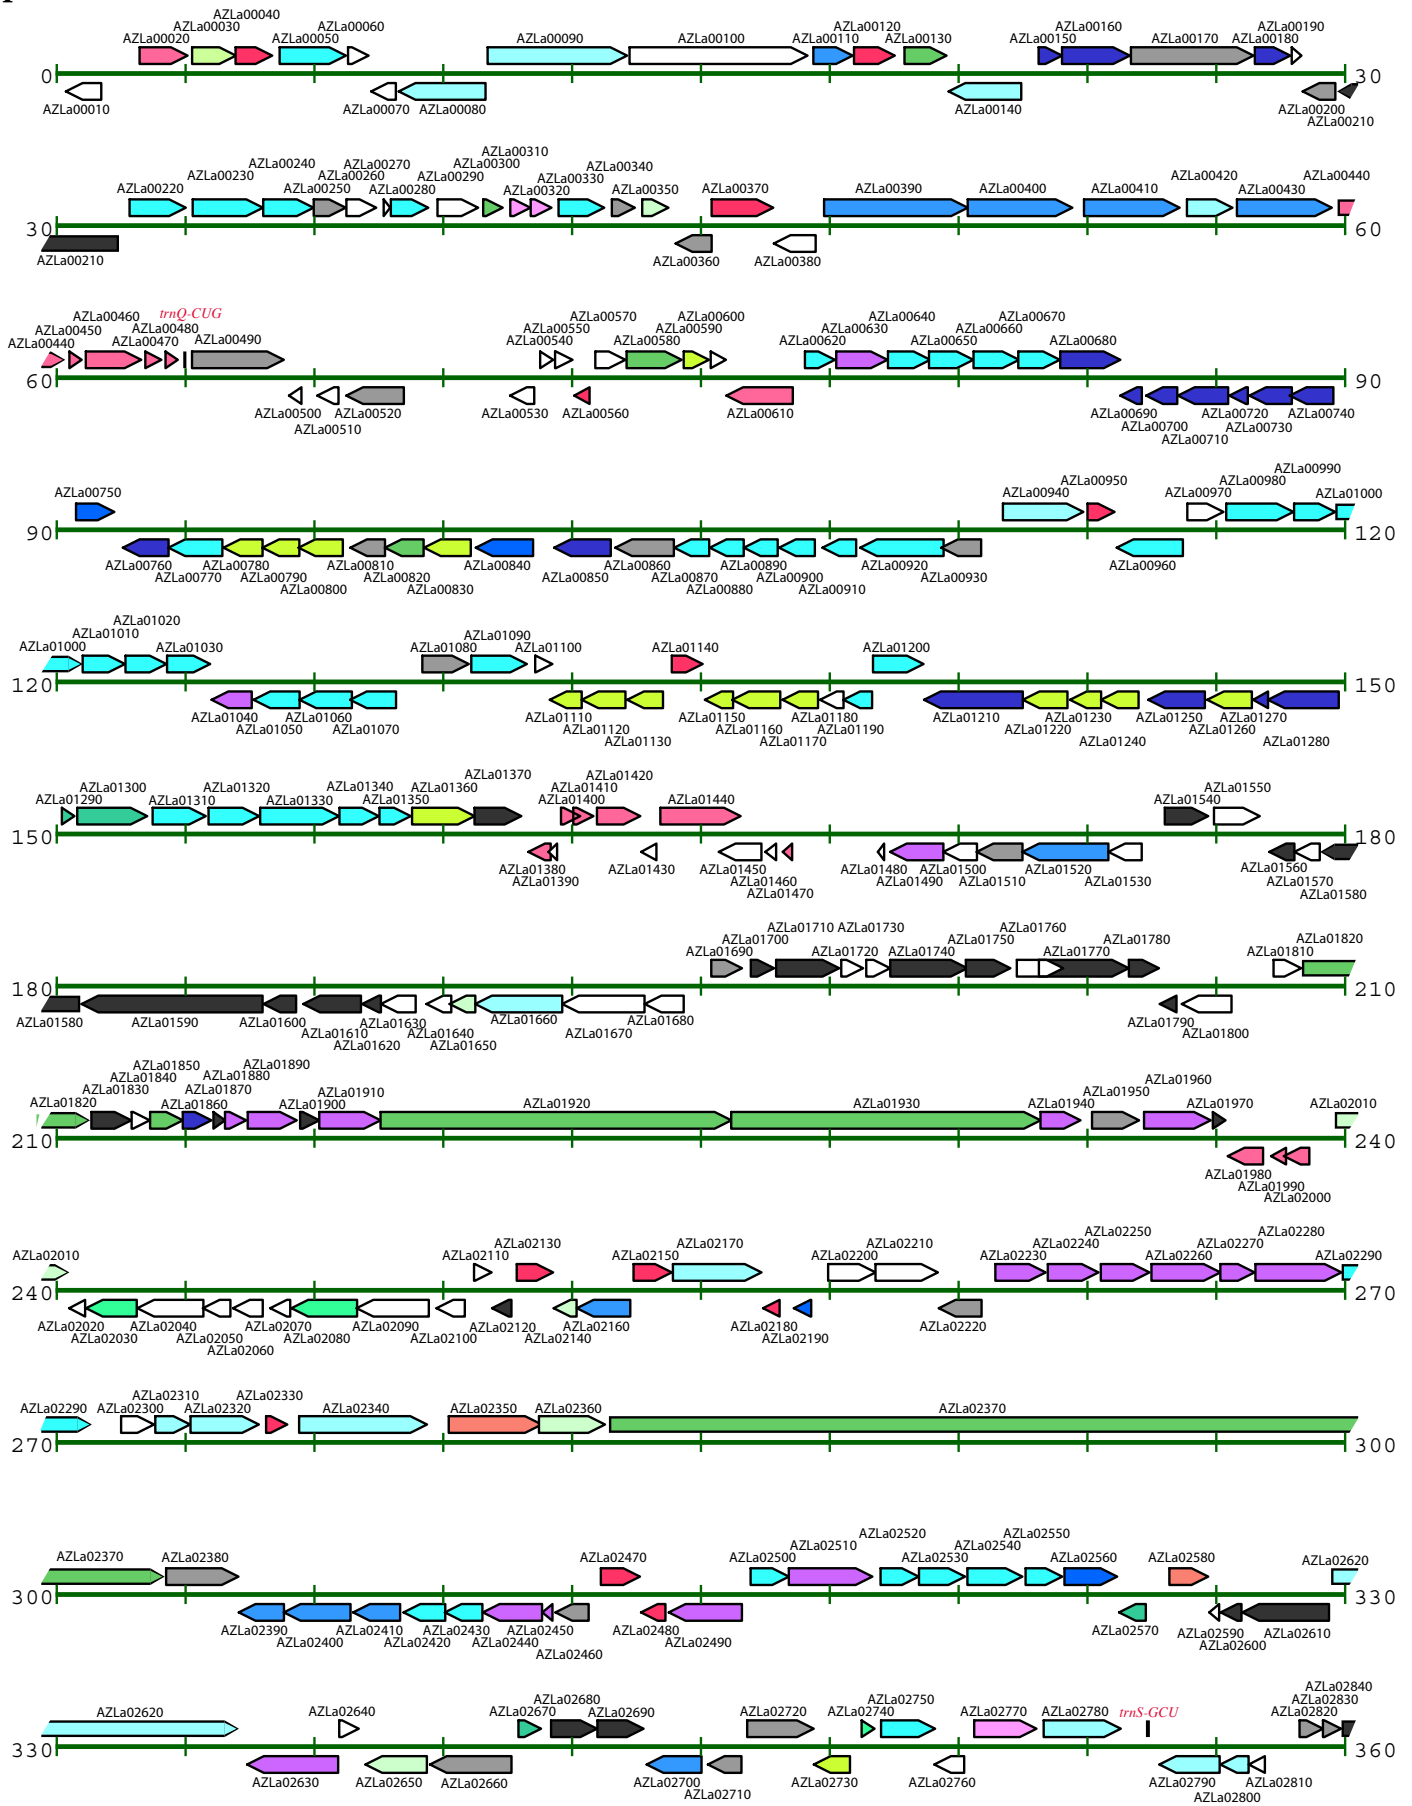

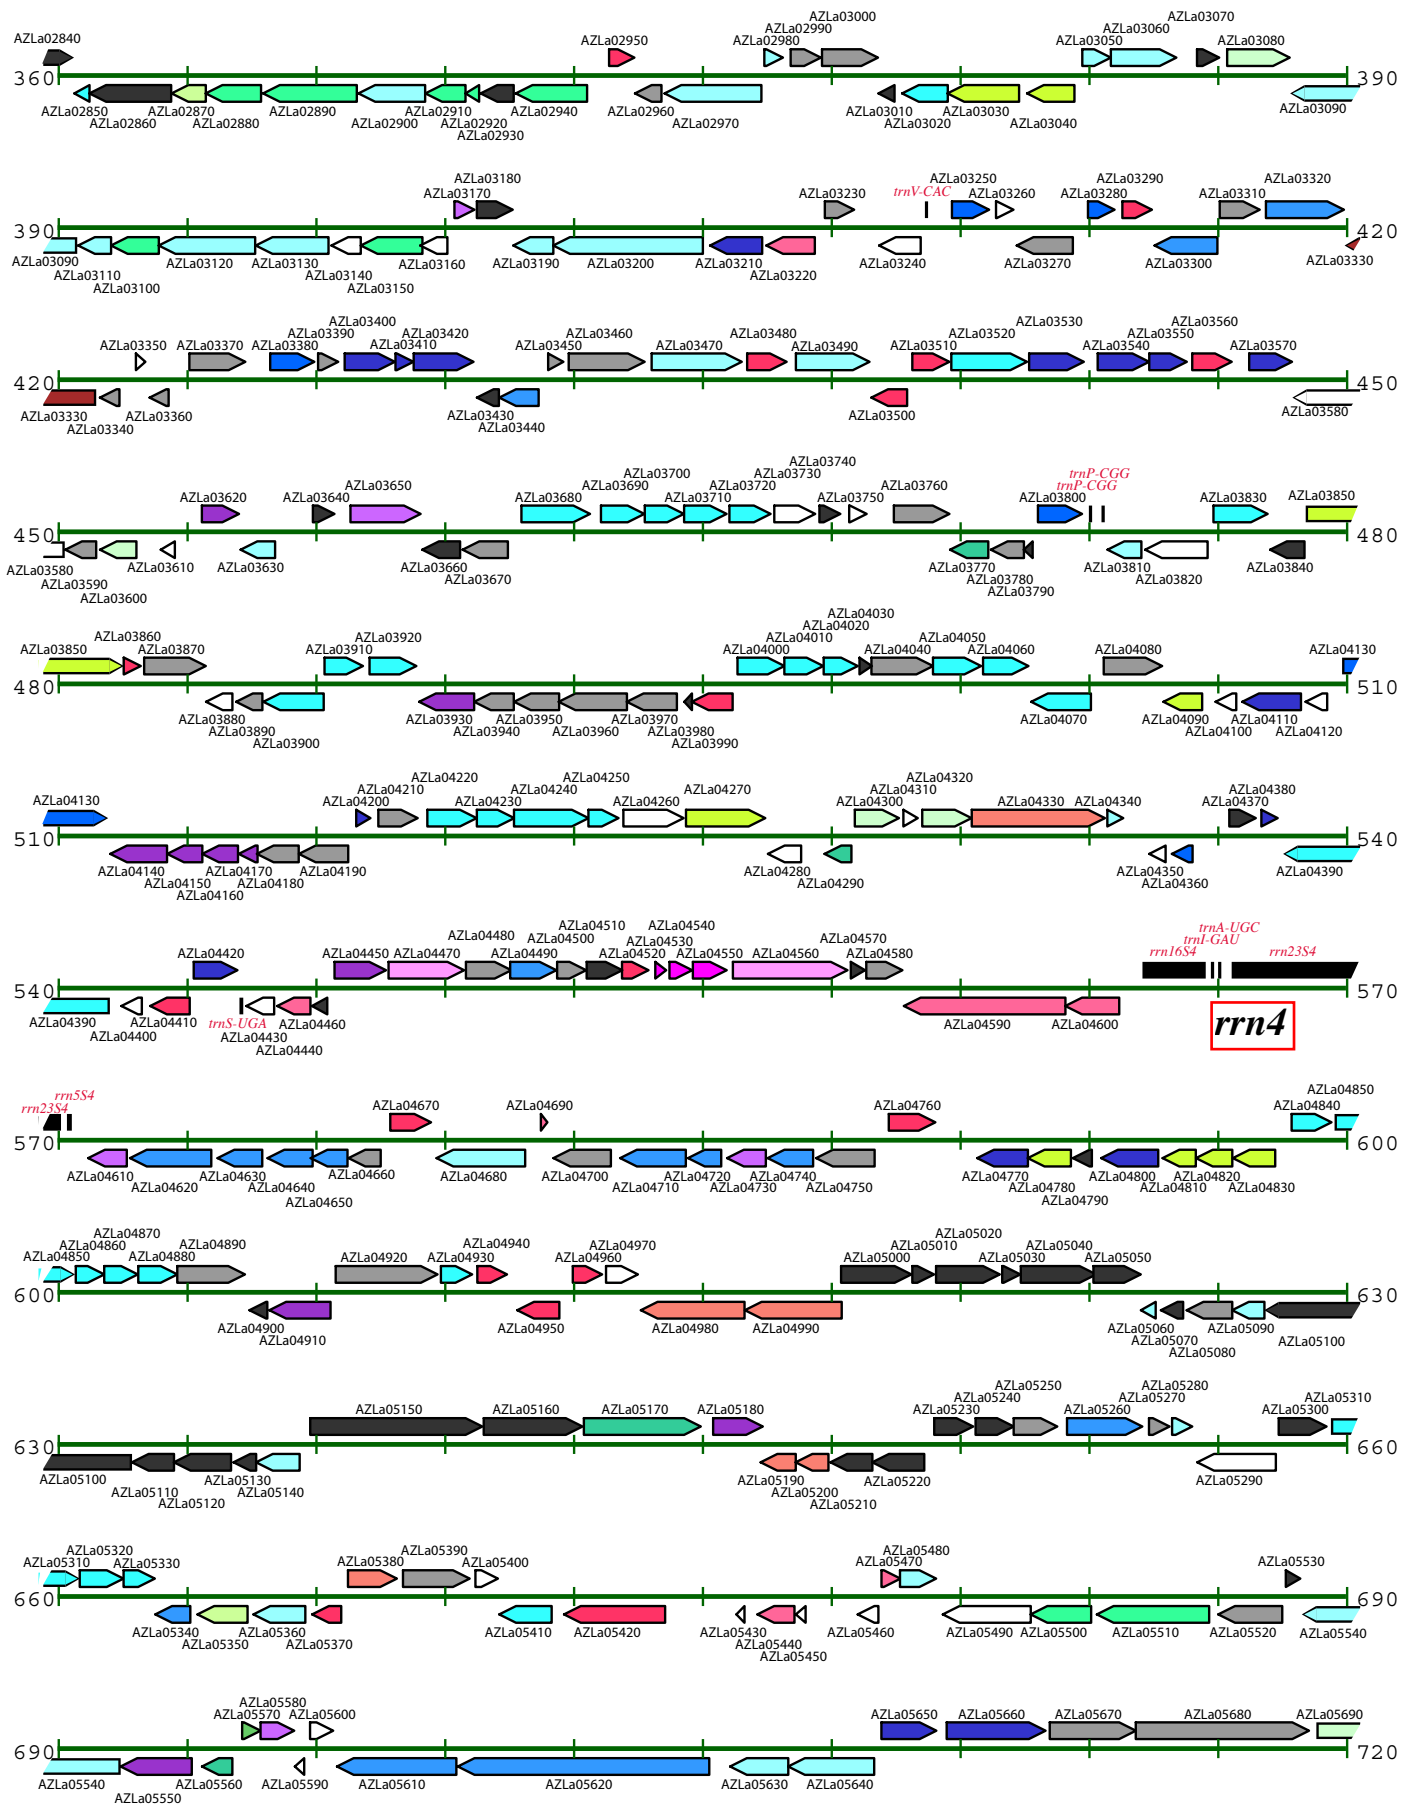



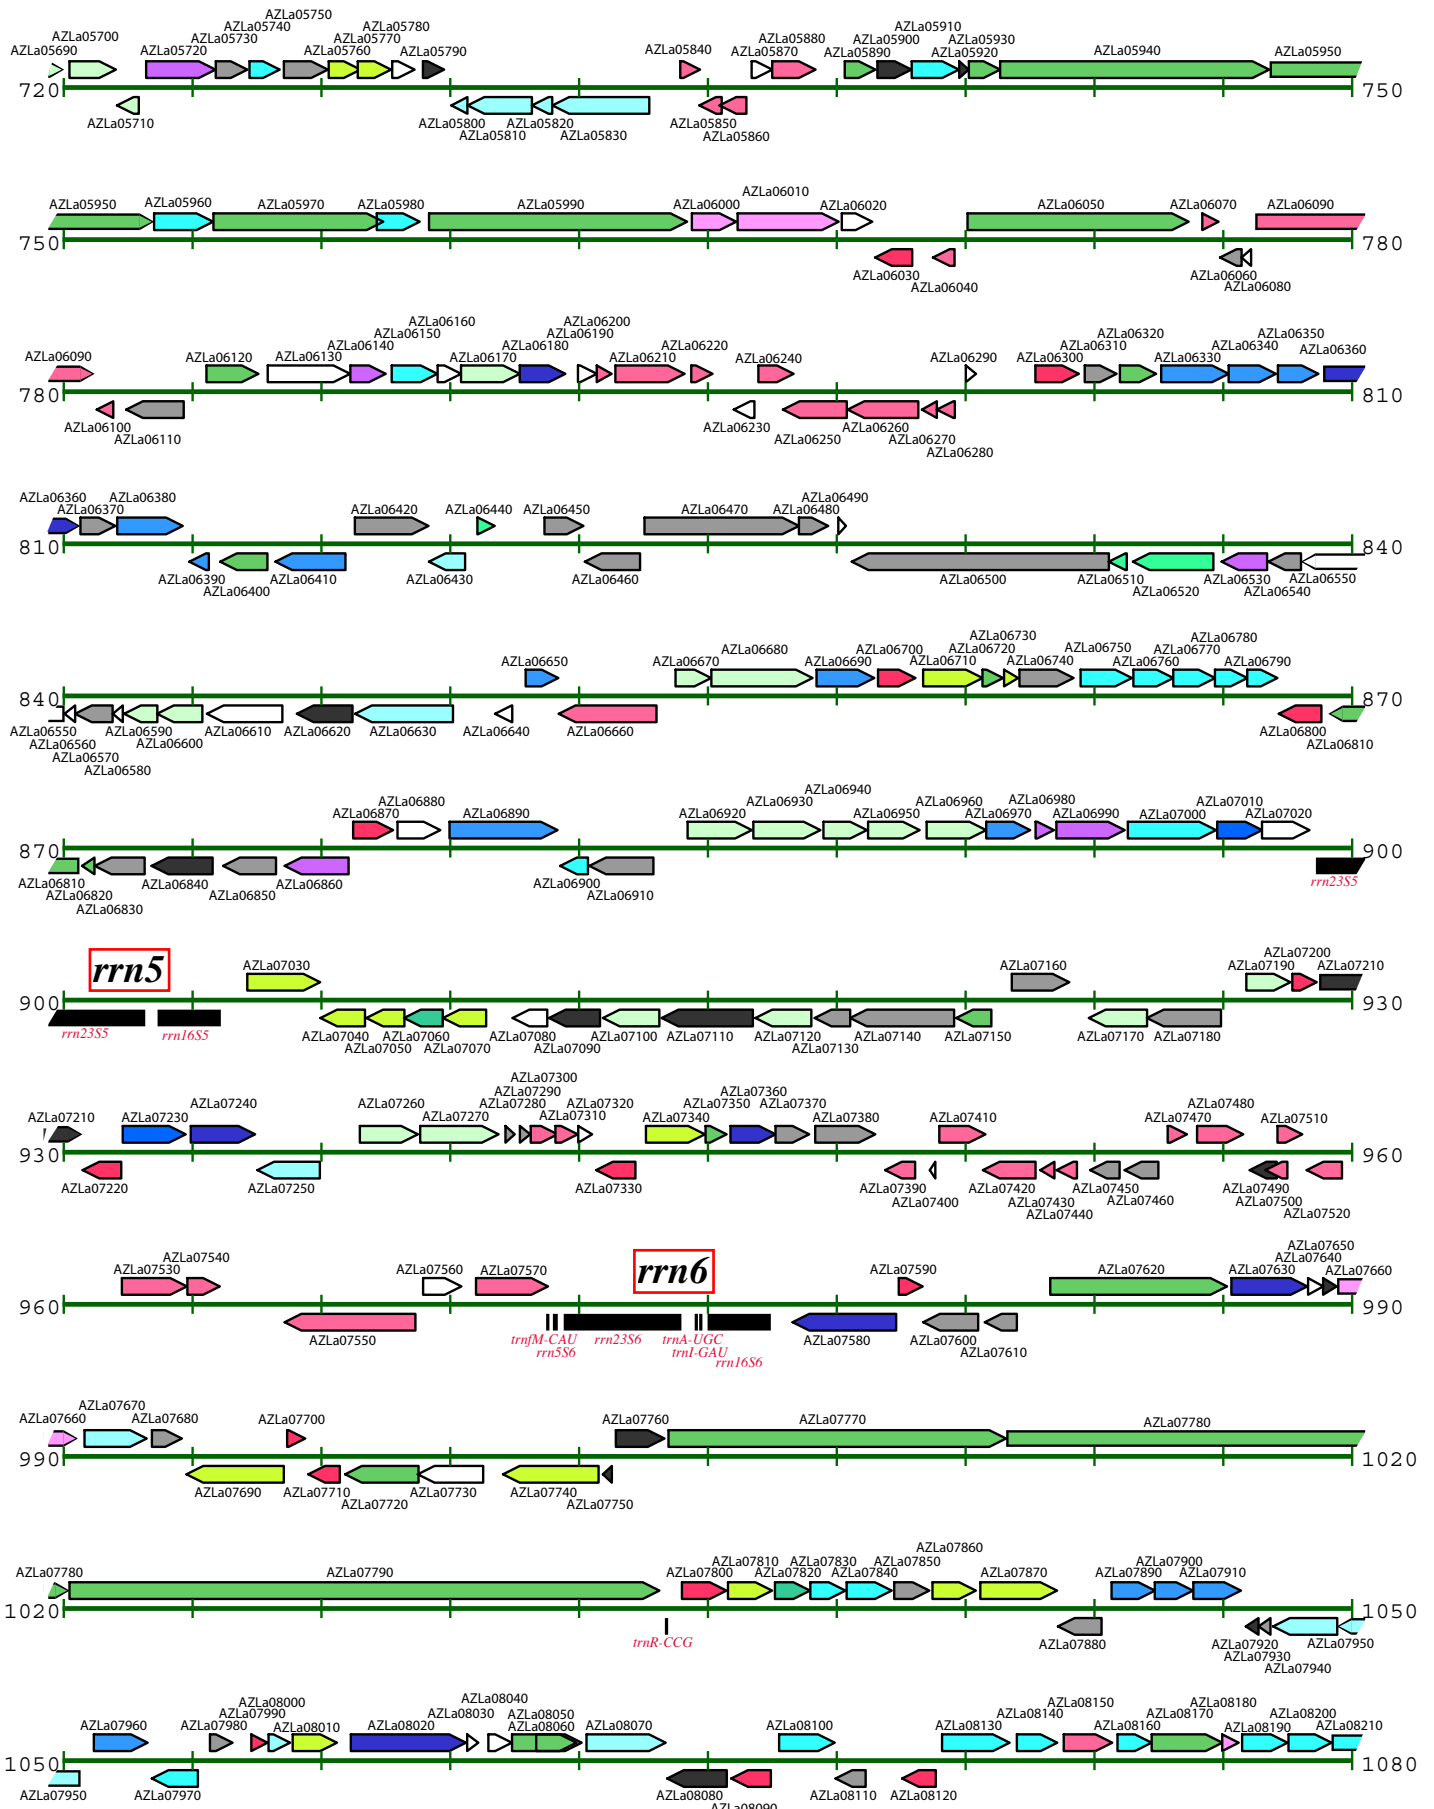

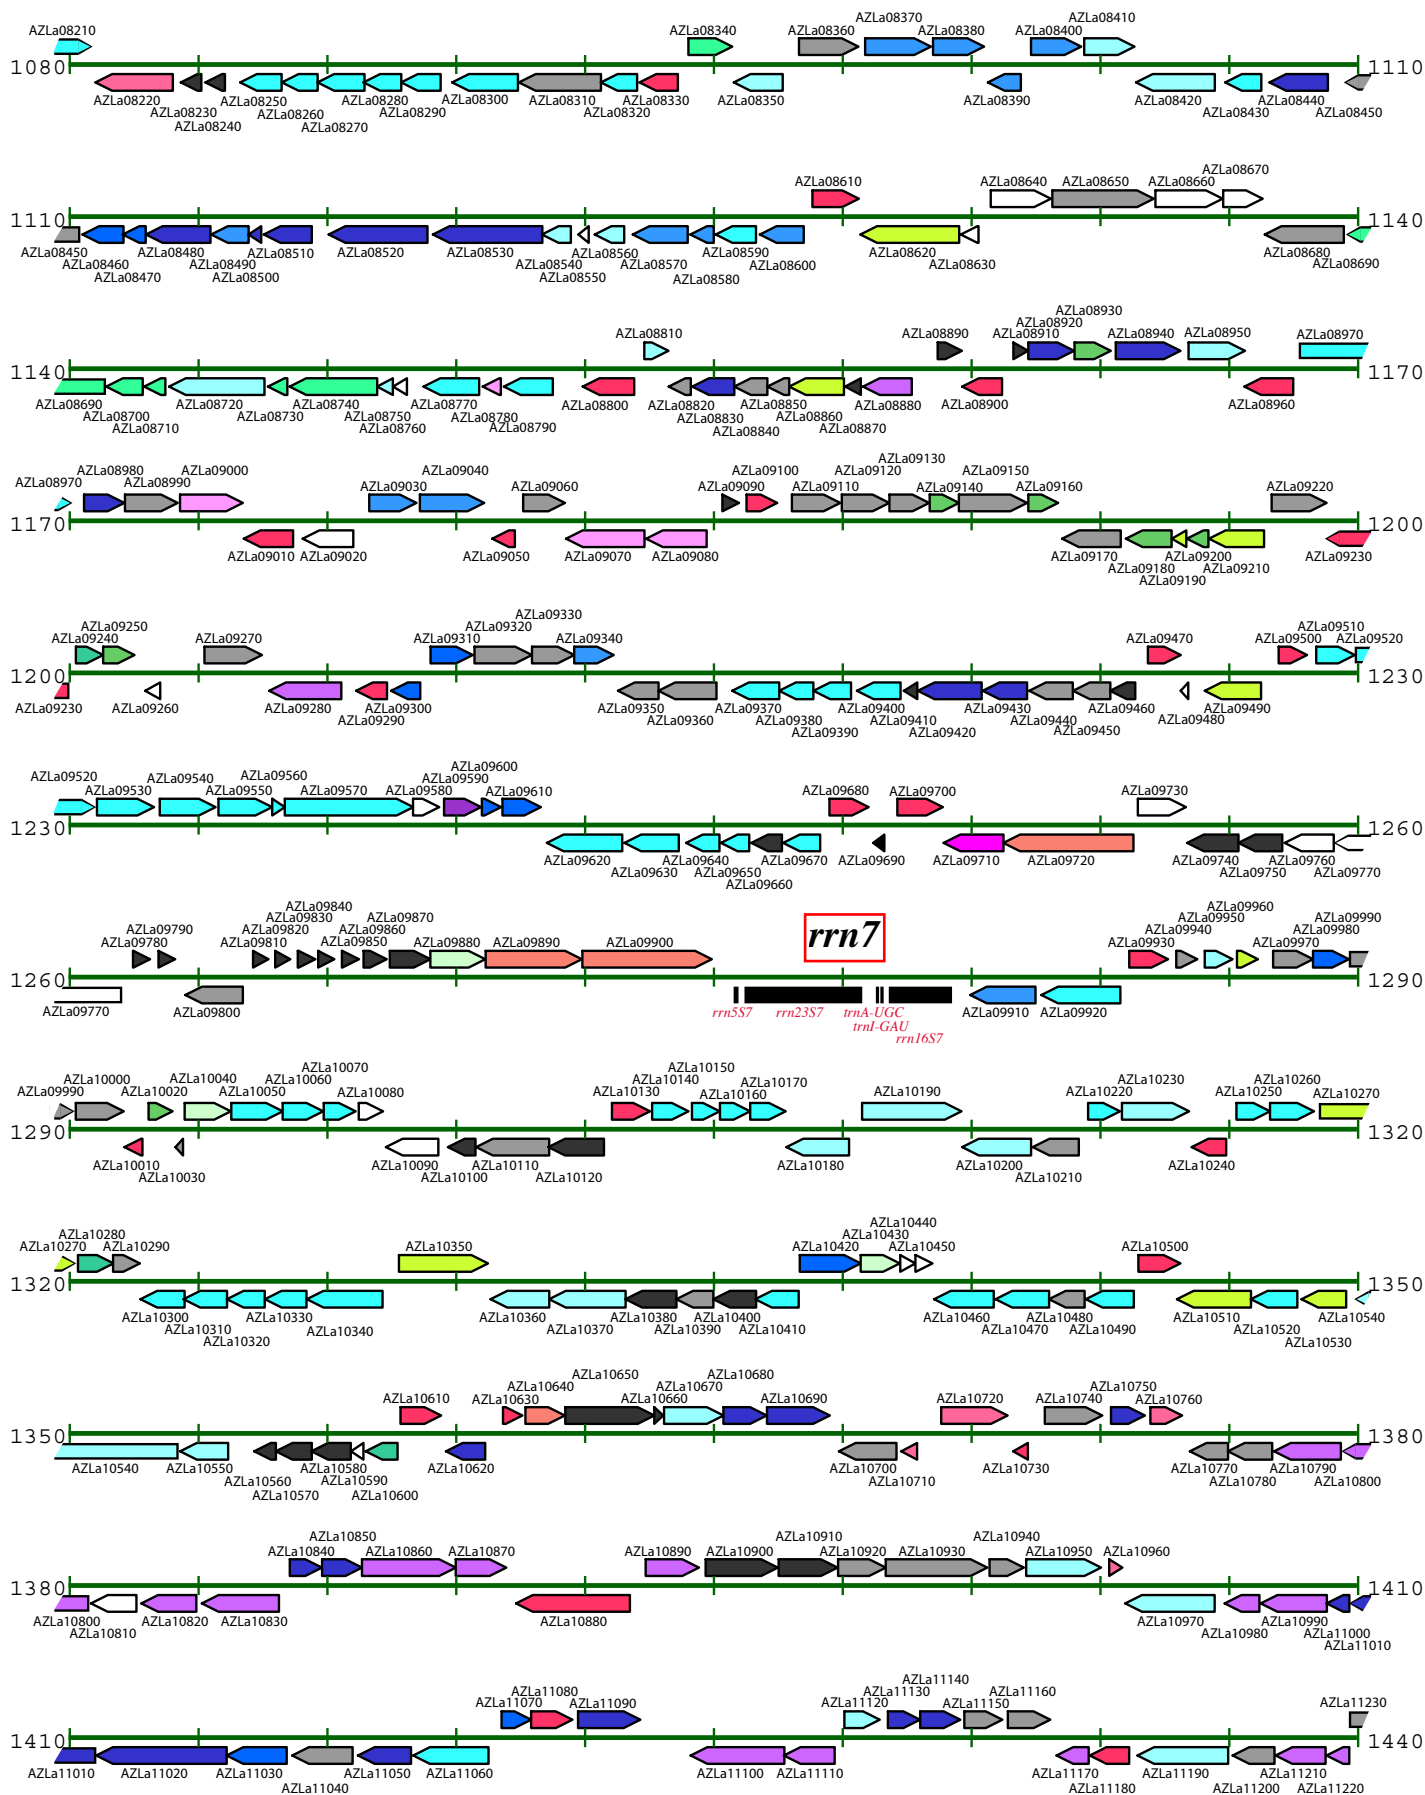

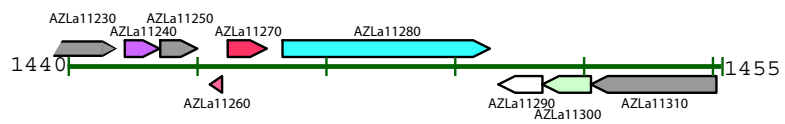

# pAB510b

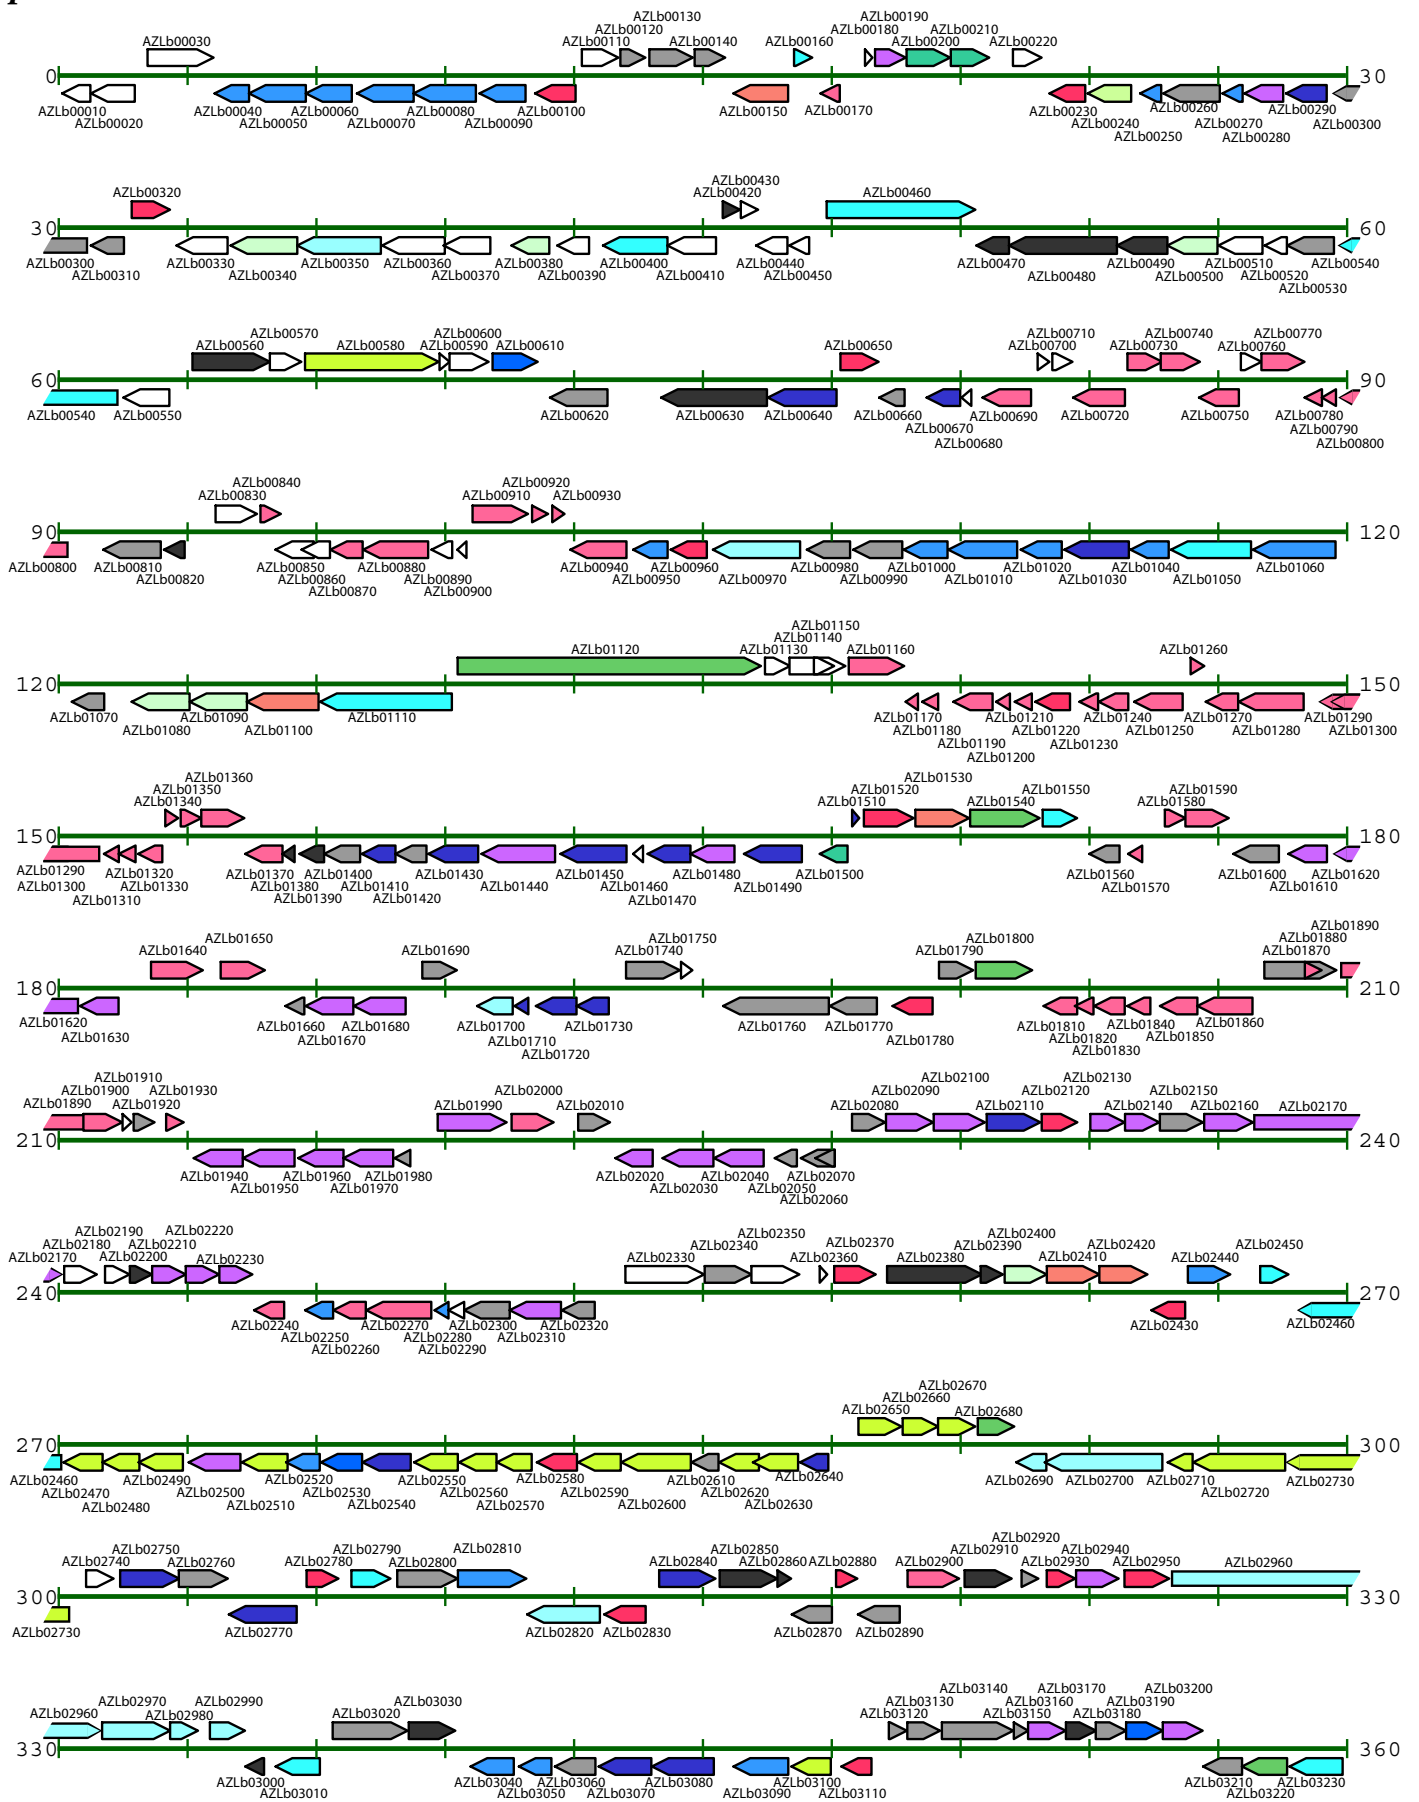

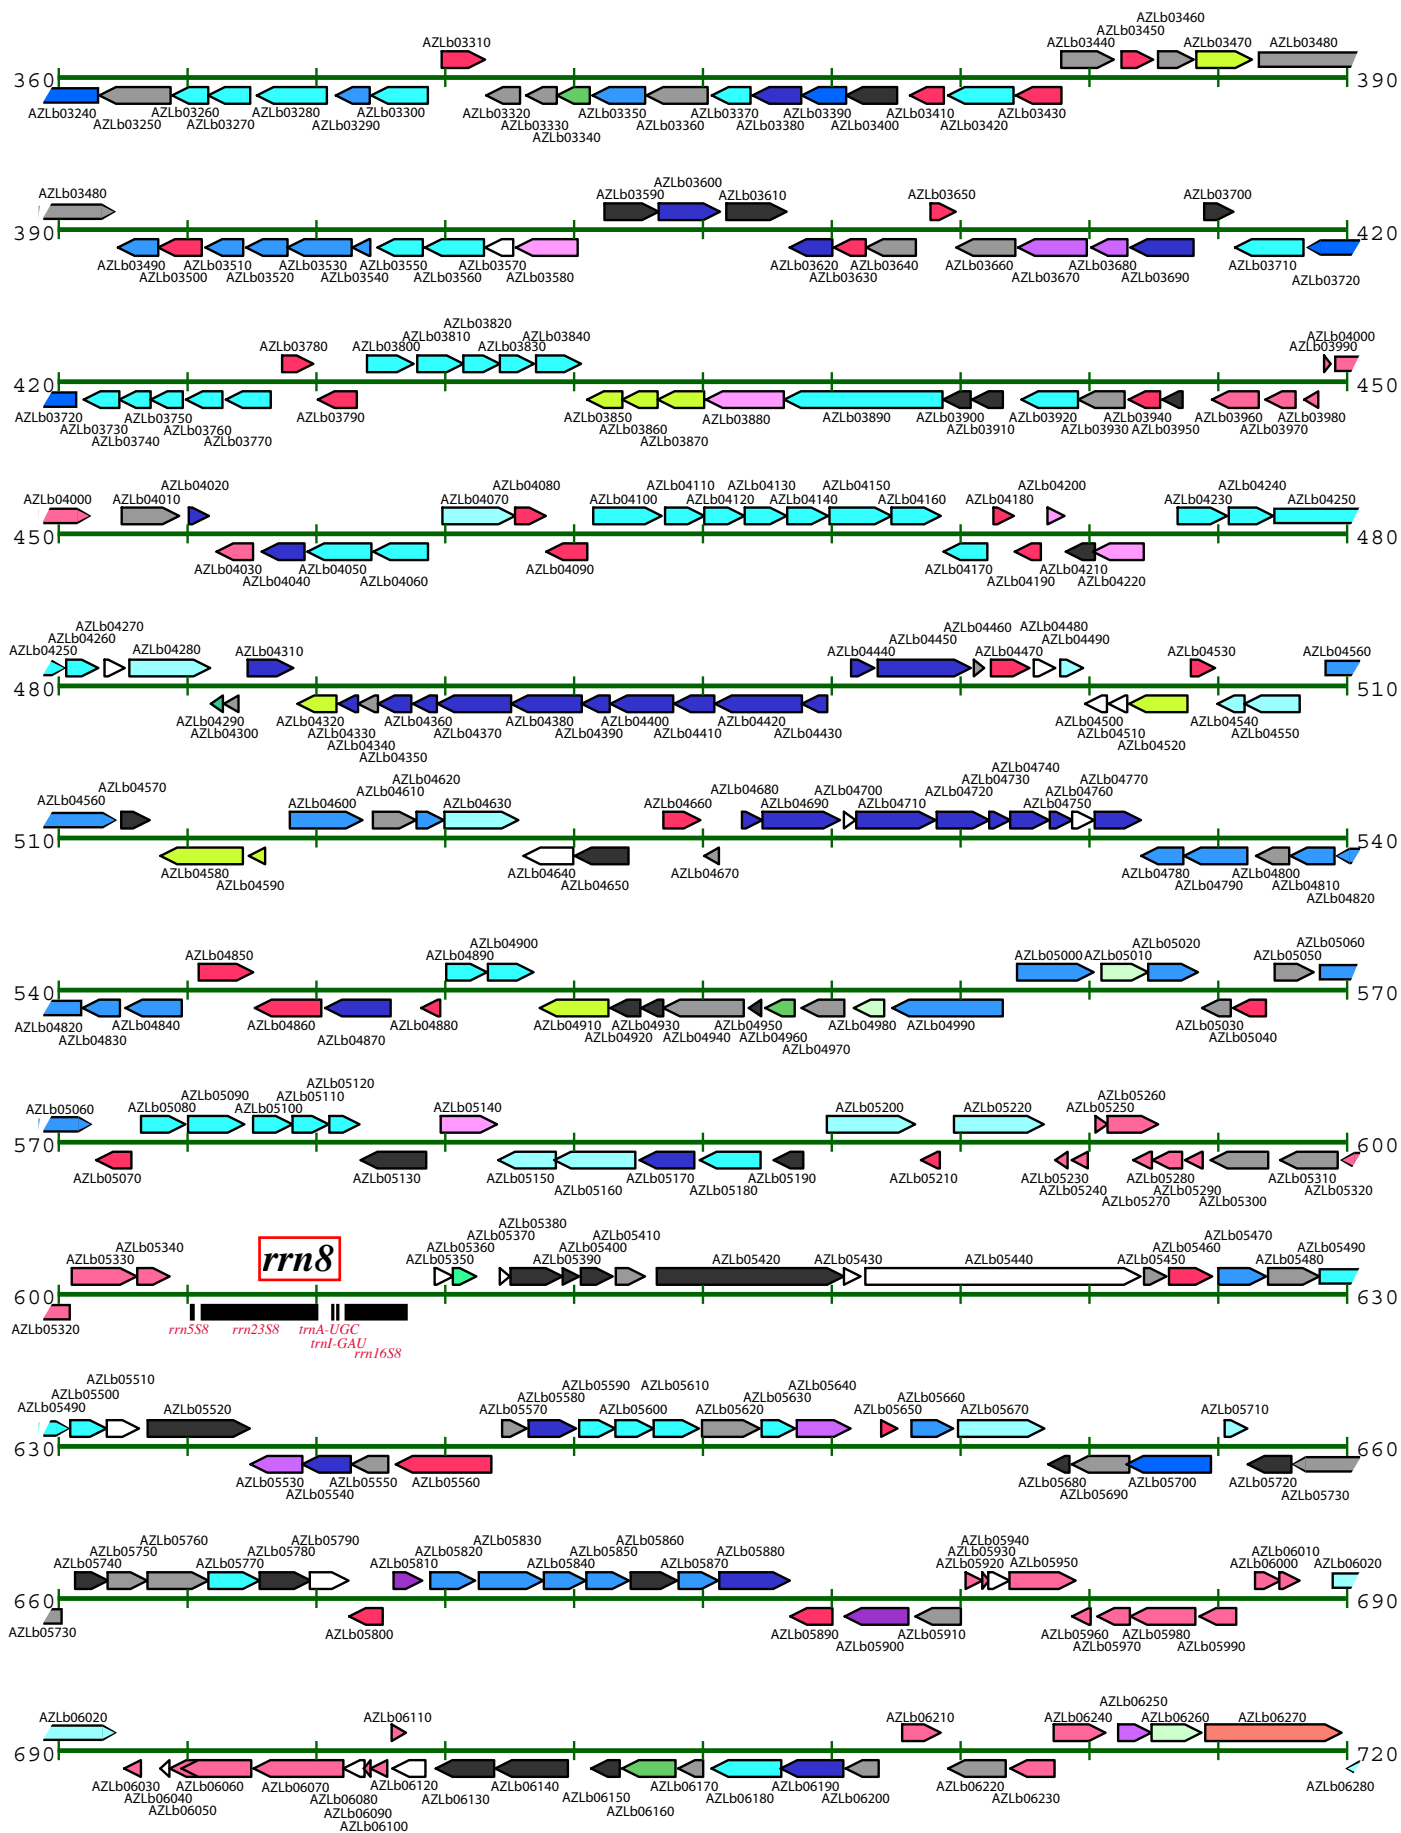

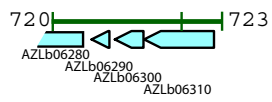

# *pAB510c*

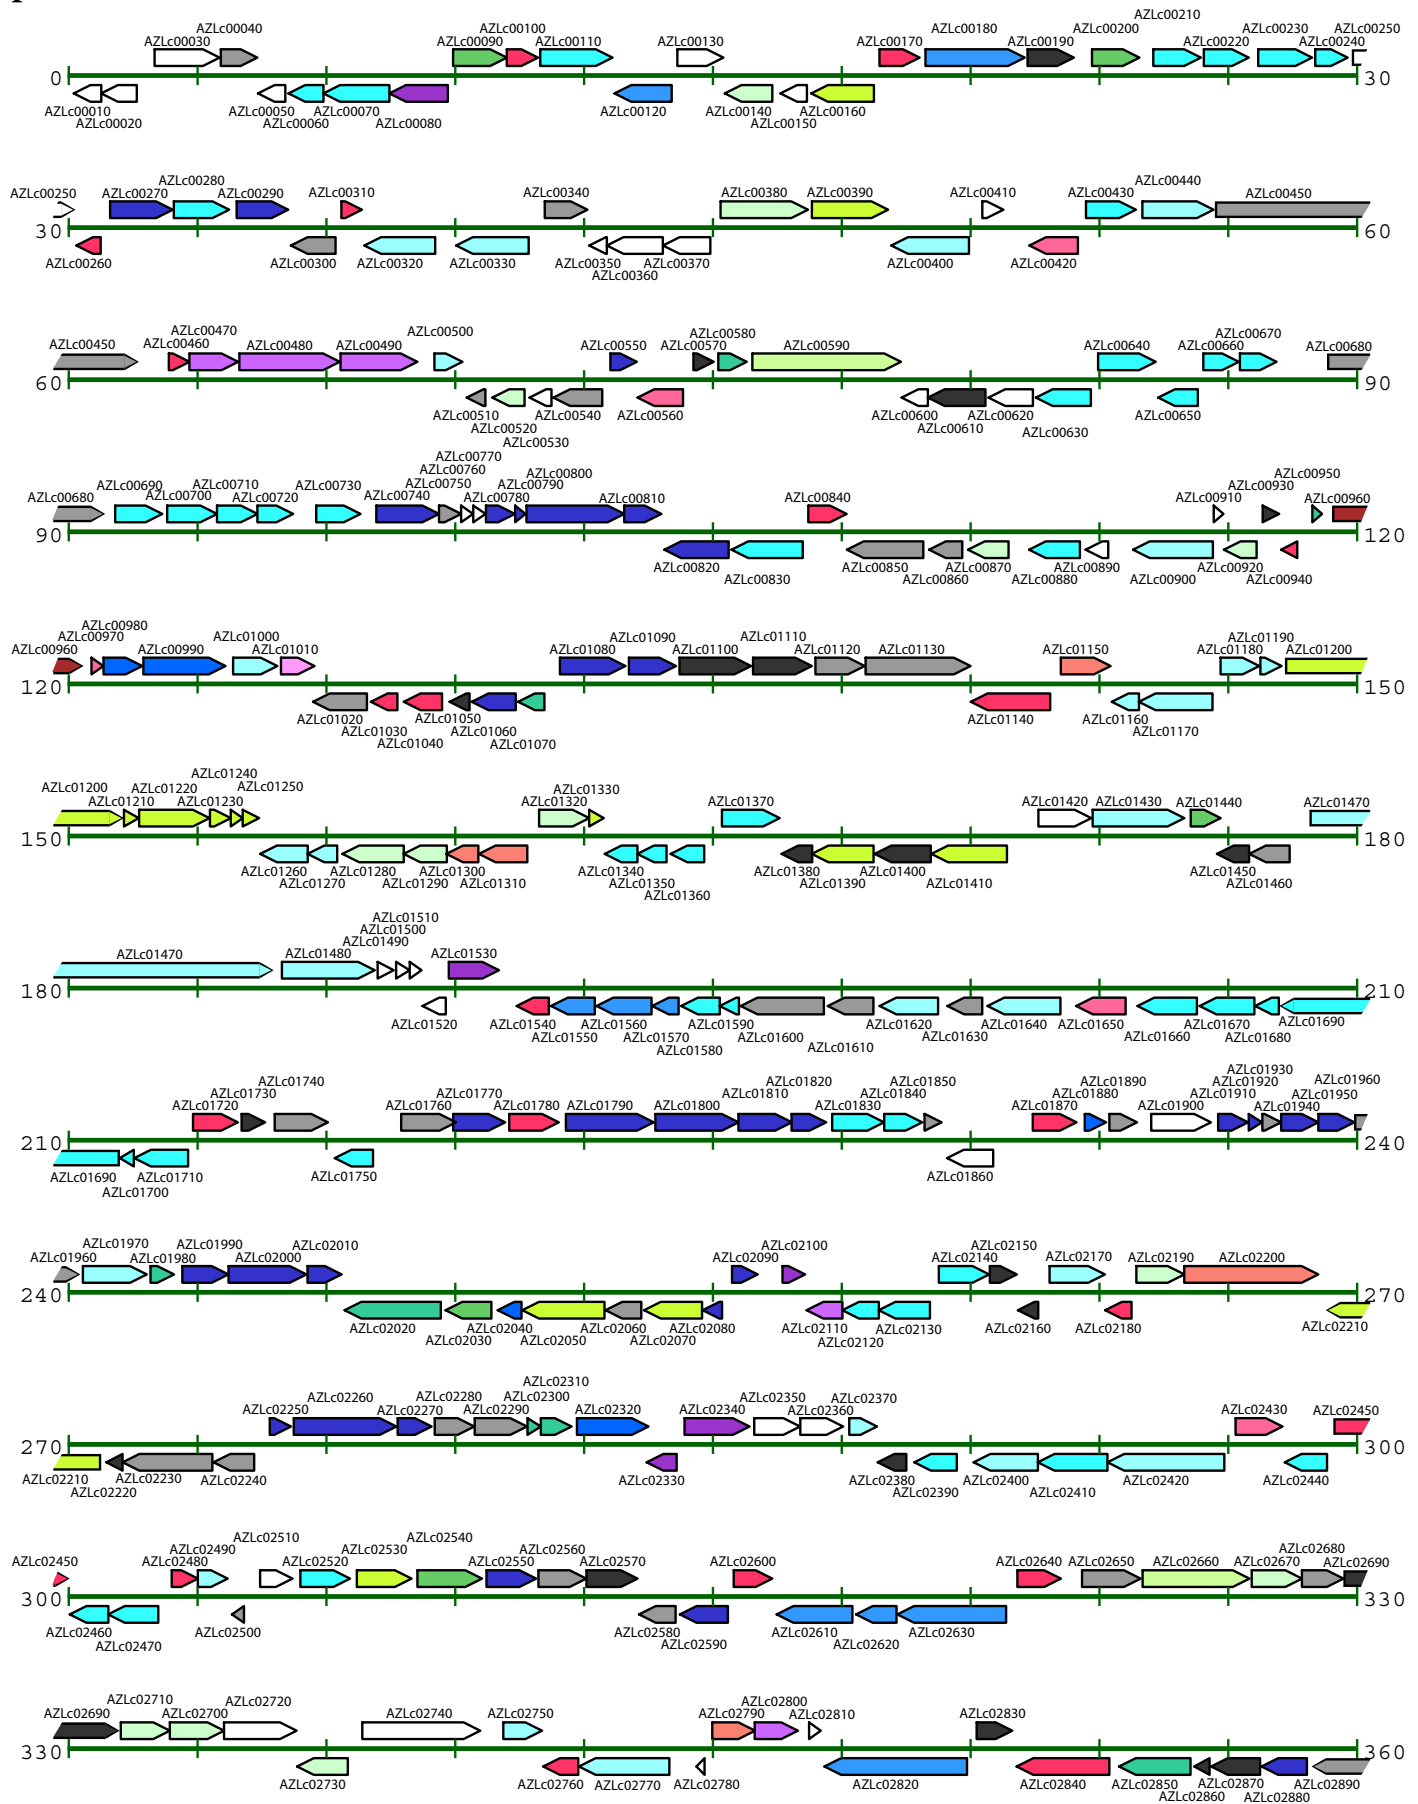

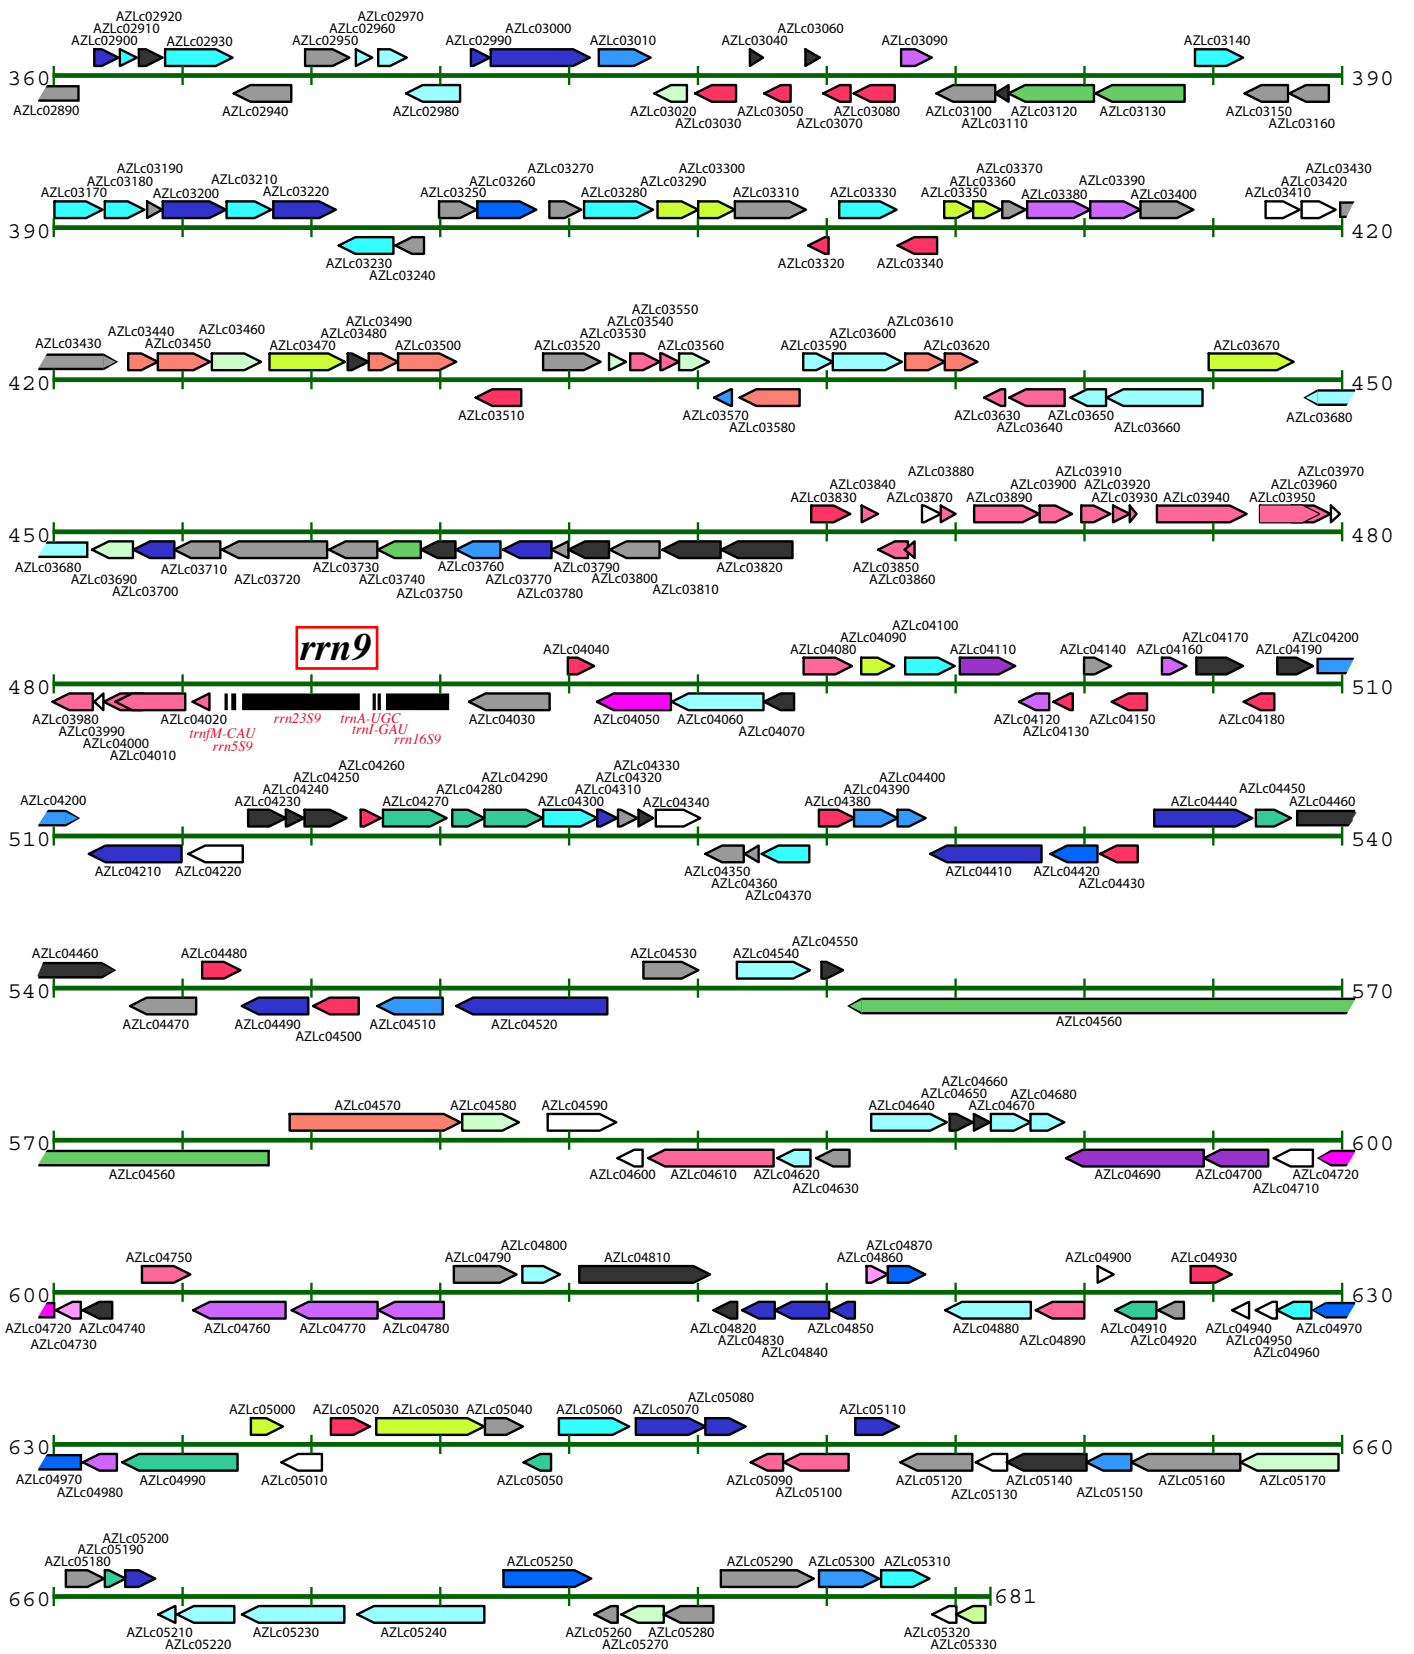



# pAB510d

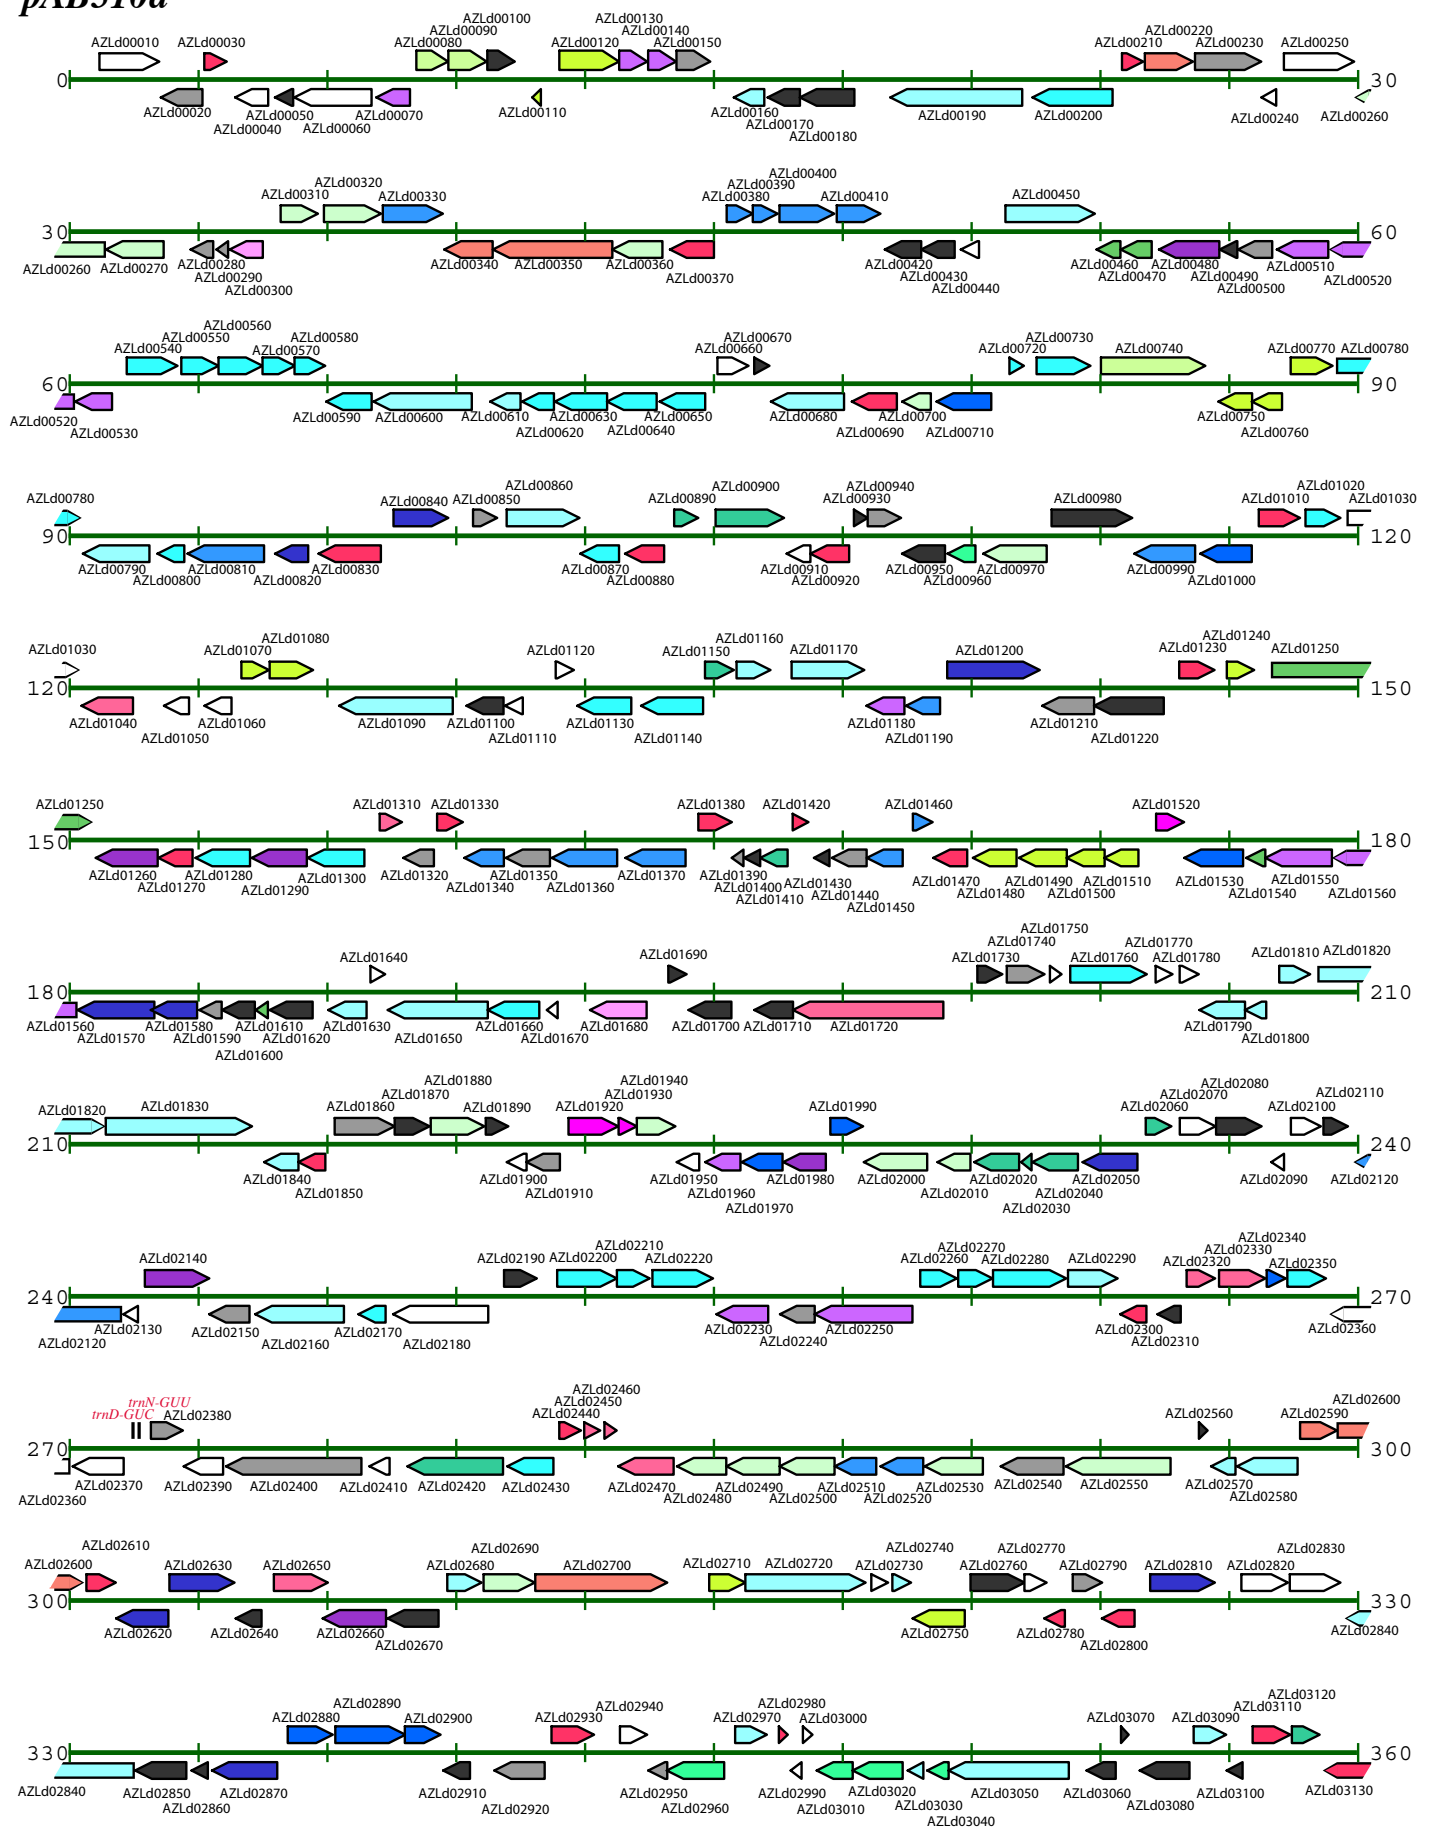

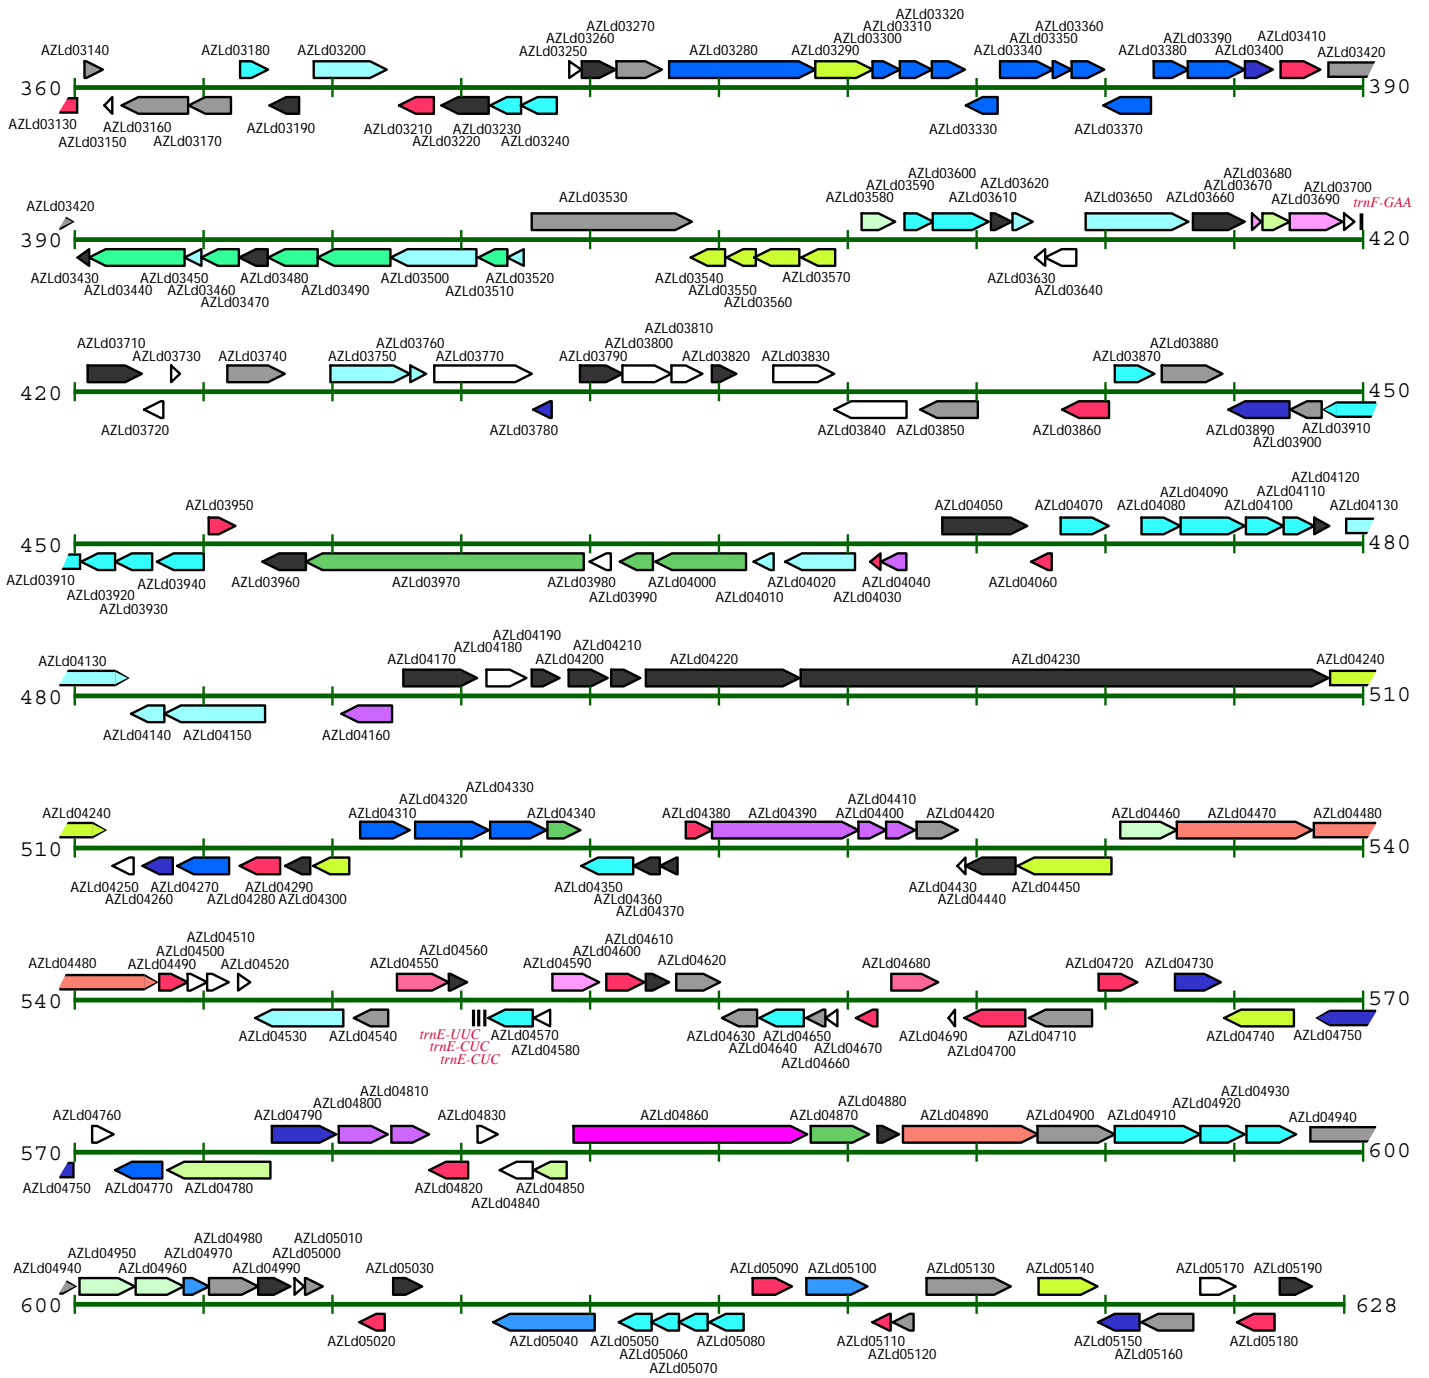

# pAB510e

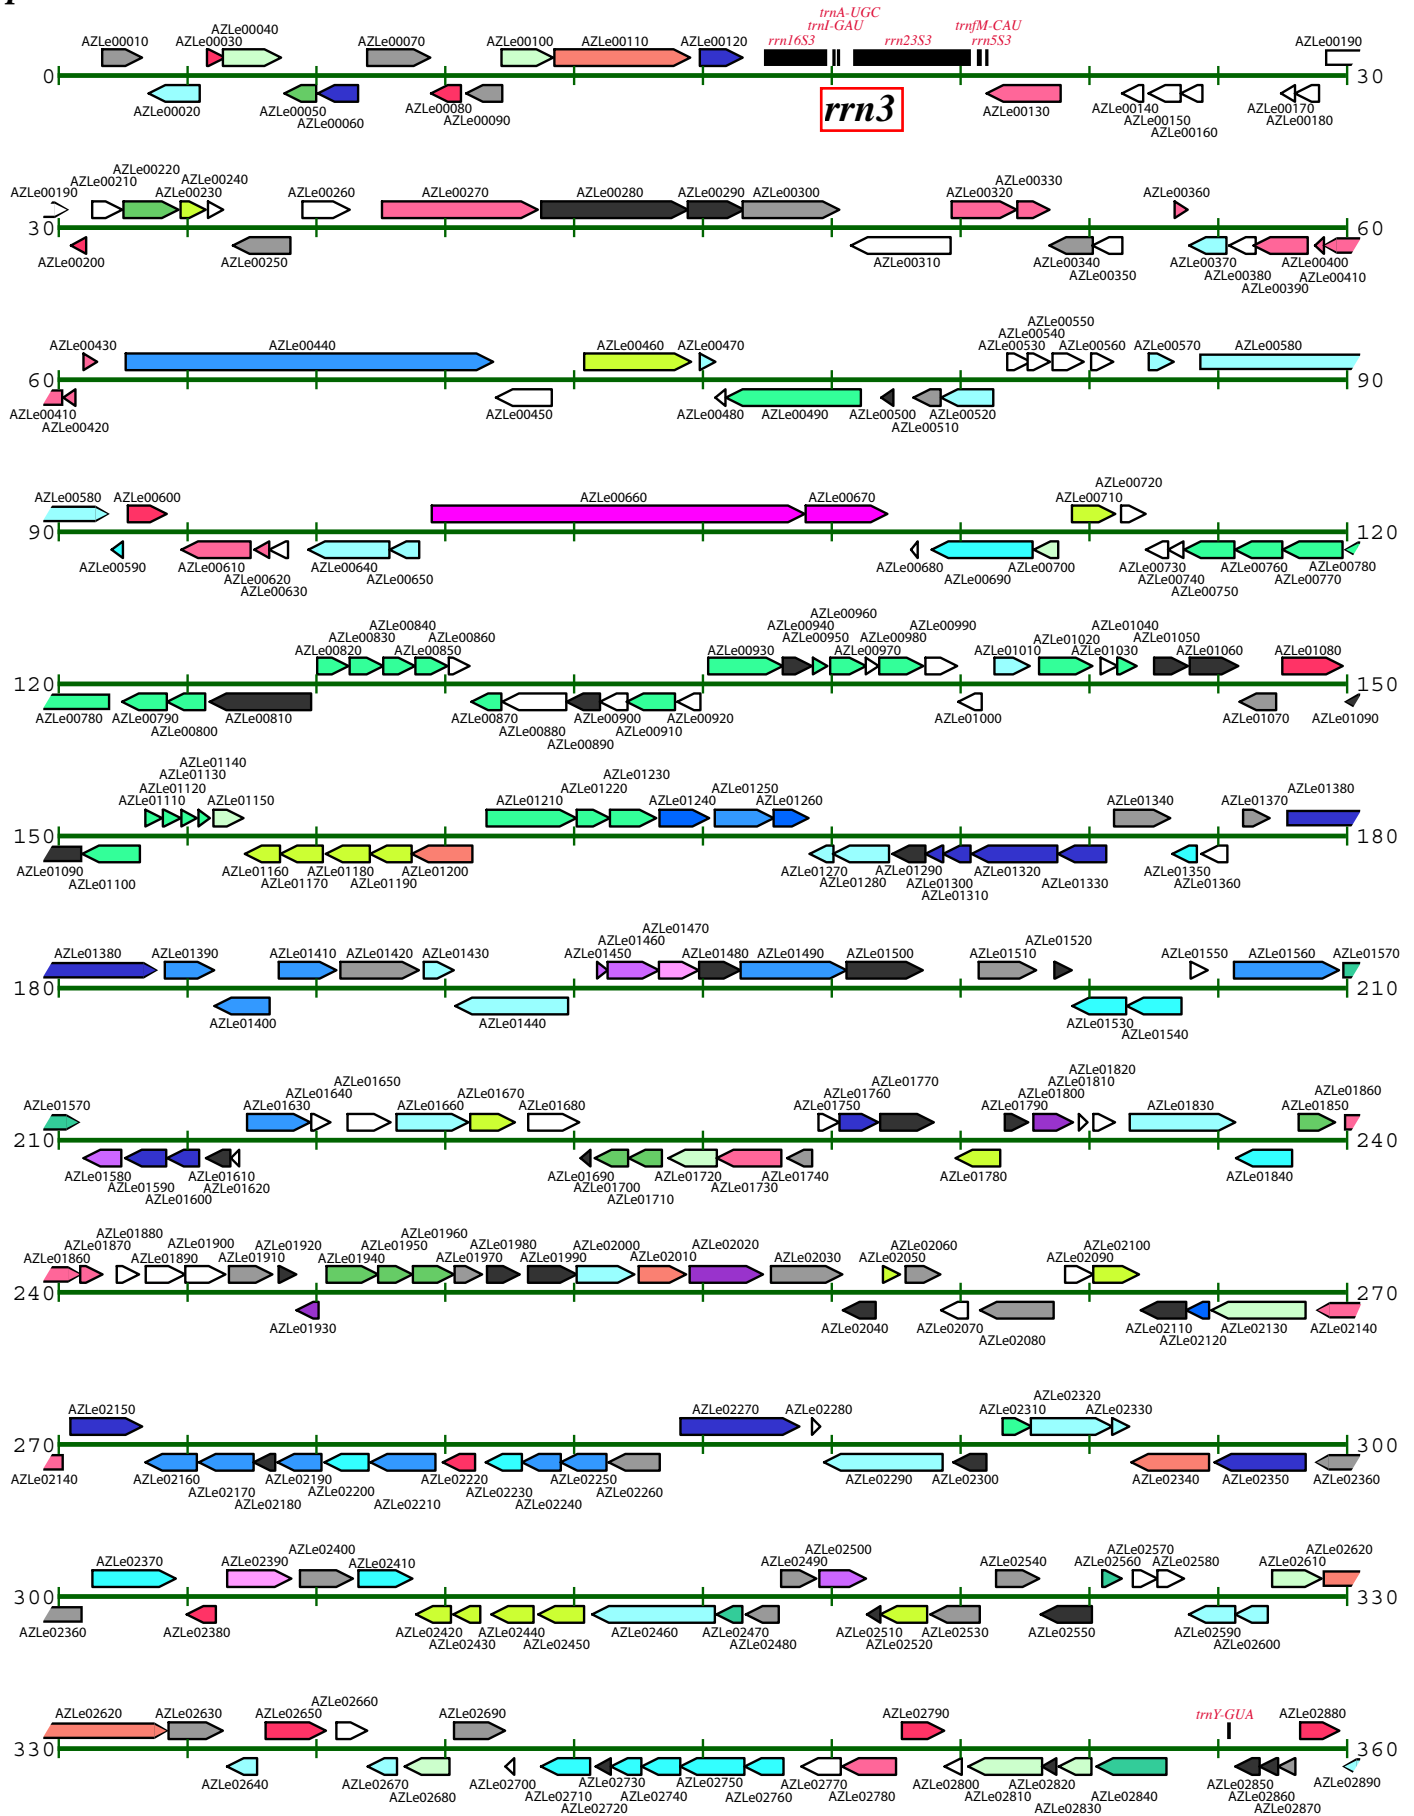

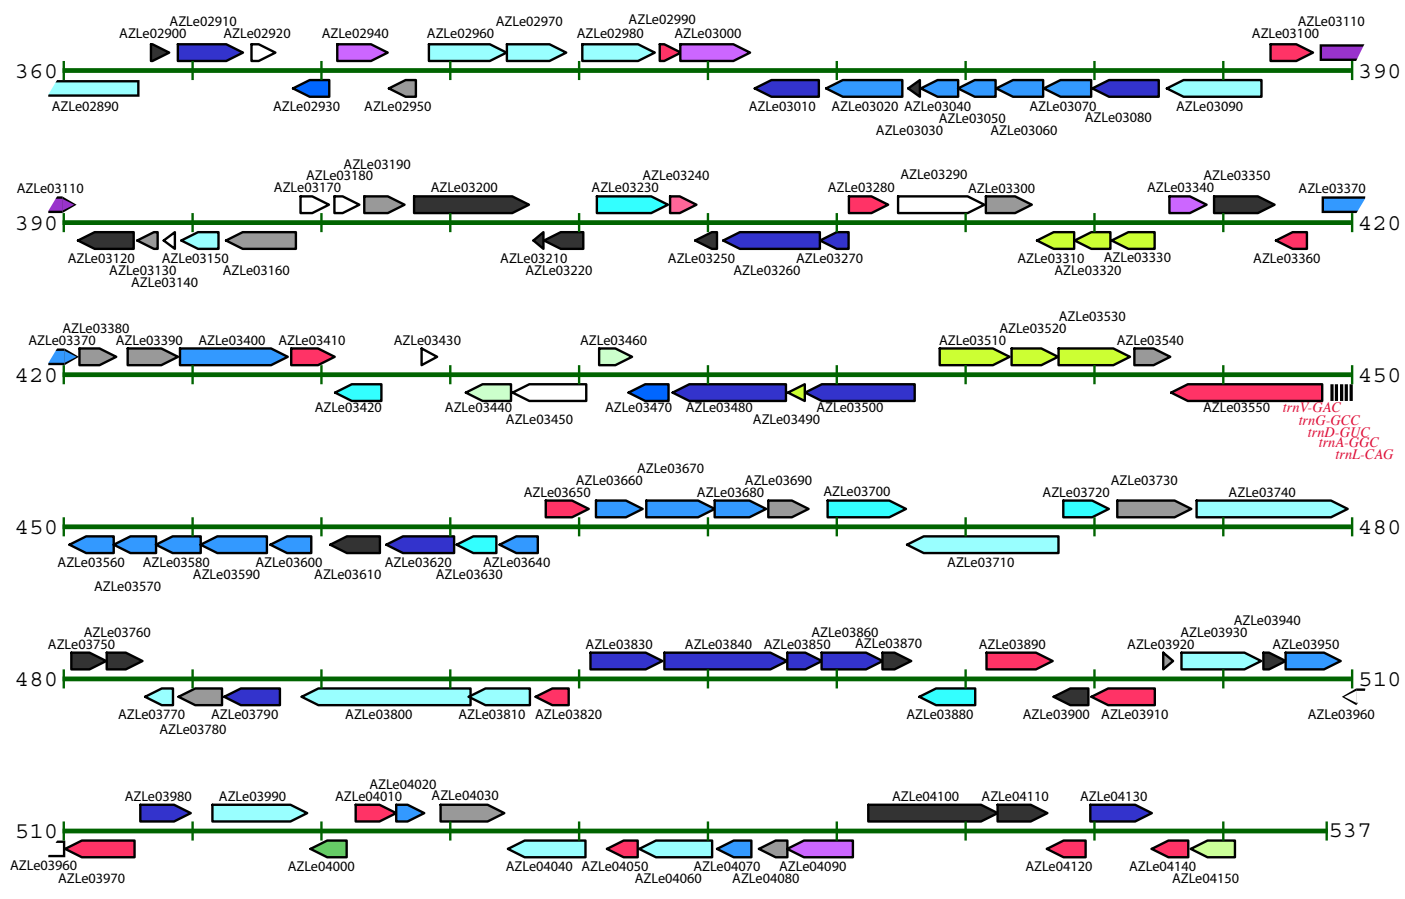

# pAB510f

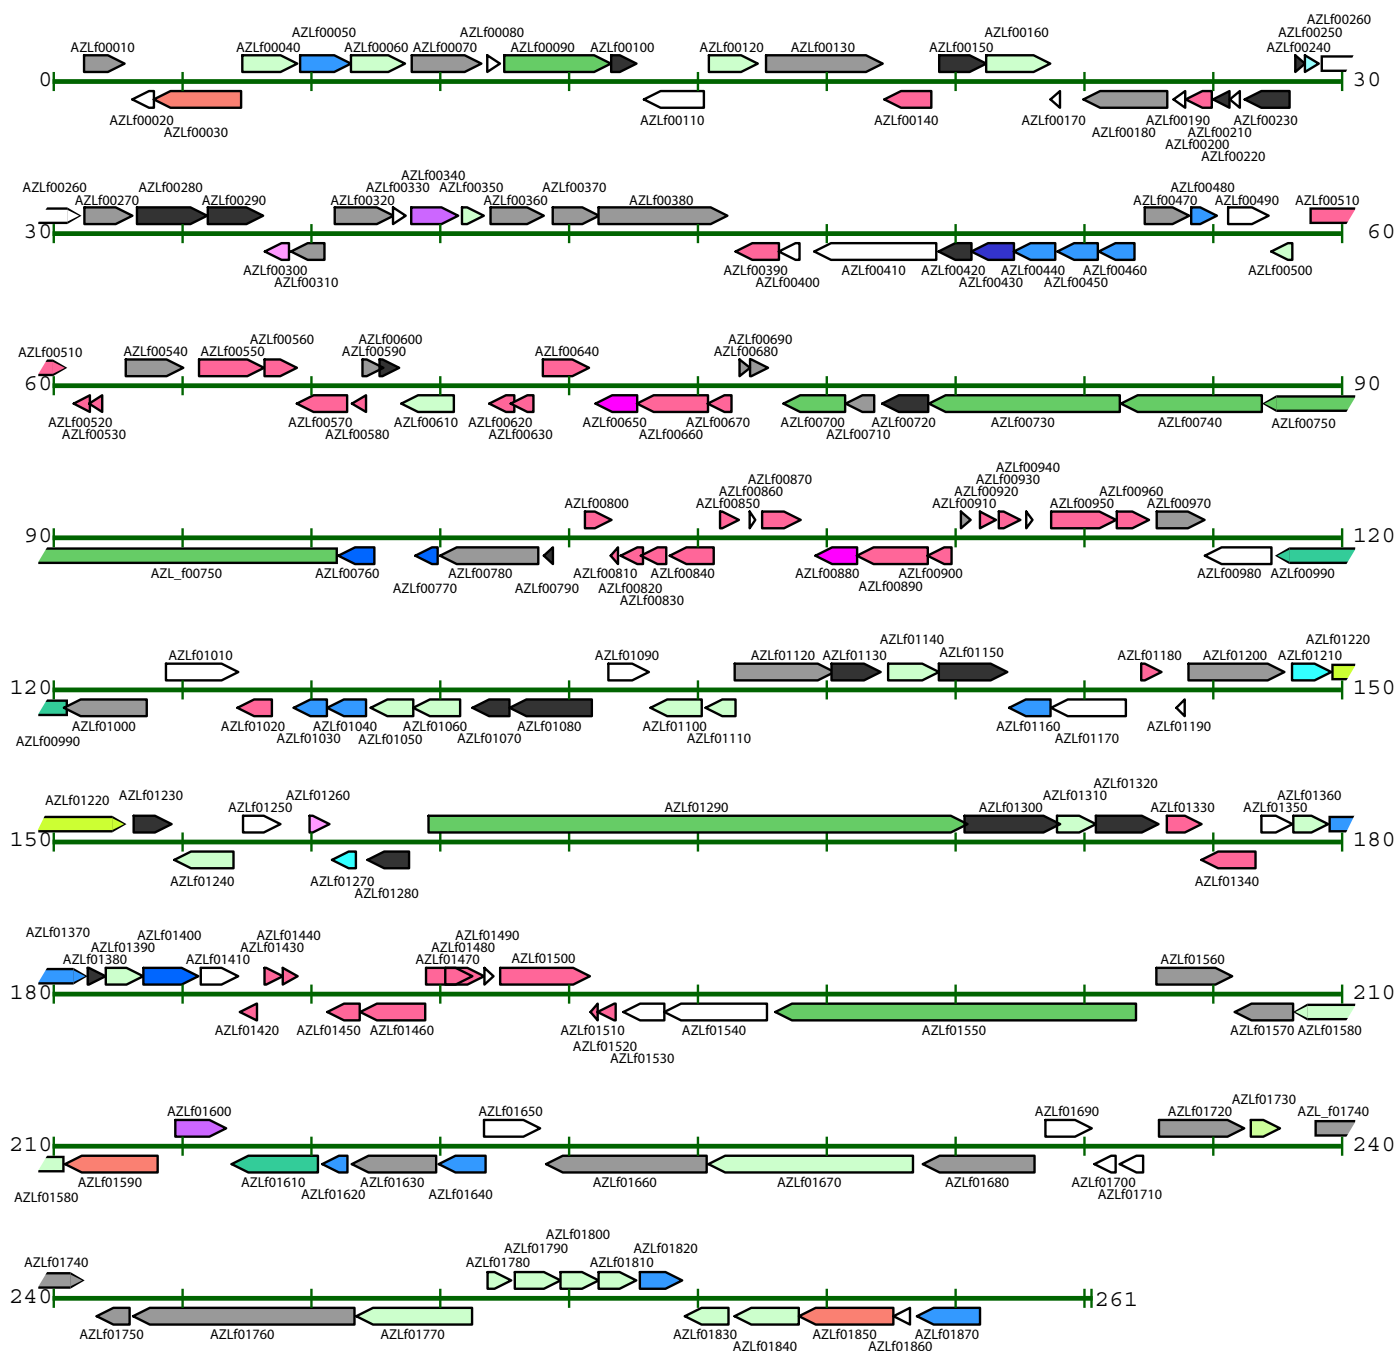

# Color codes for functional categories

|                                                                                  |                                                            |                                                                                   |                                                               |                                                                                     |                                                              |
|----------------------------------------------------------------------------------|------------------------------------------------------------|-----------------------------------------------------------------------------------|---------------------------------------------------------------|-------------------------------------------------------------------------------------|--------------------------------------------------------------|
|  | Translation, ribosomal structure and biogenesis            |  | Signal transduction mechanisms                                |  | Amino acid transport and metabolism                          |
|  | RNA / RNA processing and modification                      |  | Cell wall /membrane/envelope biogenesis                       |  | Nucleotide transport and metabolism                          |
|  | Transcription                                              |  | Cell motility                                                 |  | Coenzyme transport and metabolism                            |
|  | Replication, recombination and repair                      |  | Extracellular structures                                      |  | Lipid transport and metabolism                               |
|  | Chromatin structure and dynamics                           |  | Intracellular trafficking, secretion, and vesicular transport |  | Inorganic ion transport and metabolism                       |
|  | Cell cycle control, cell division, chromosome partitioning |  | Posttranslational modification, protein turnover, chaperones  |  | Secondary metabolites biosynthesis, transport and catabolism |
|  | Nuclear structure                                          |  | Energy production and conversion                              |  | General function prediction only                             |
|  | Defense mechanisms                                         |  | Carbohydrate transport and metabolism                         |  | Function unknown                                             |
|                                                                                  |                                                            |                                                                                   |                                                               |  | Not in COGs                                                  |

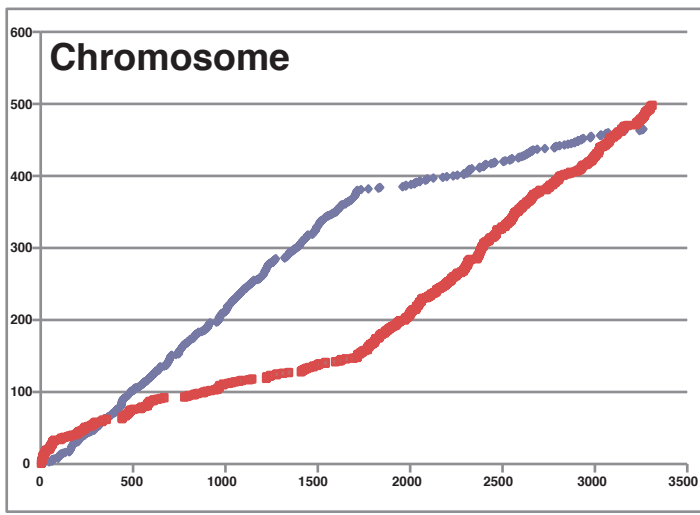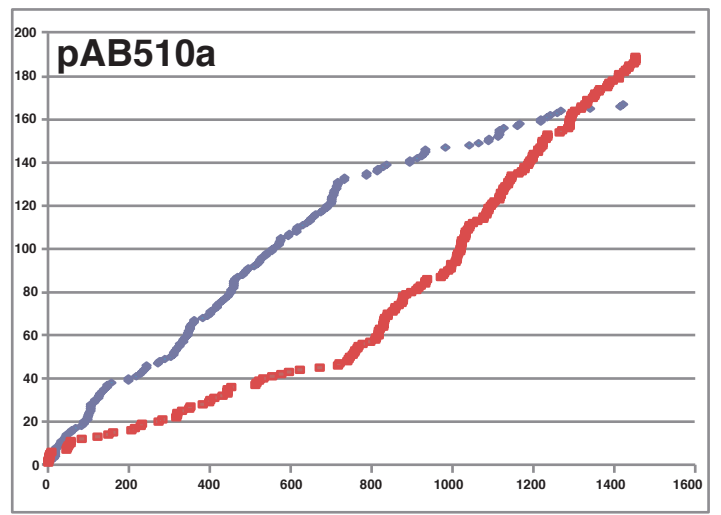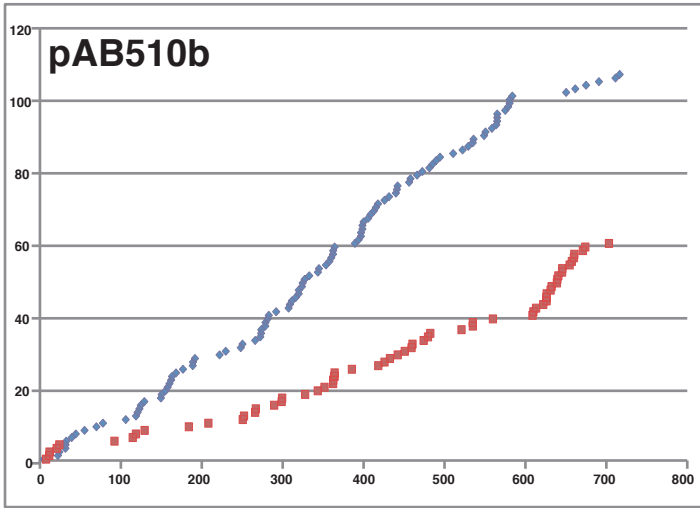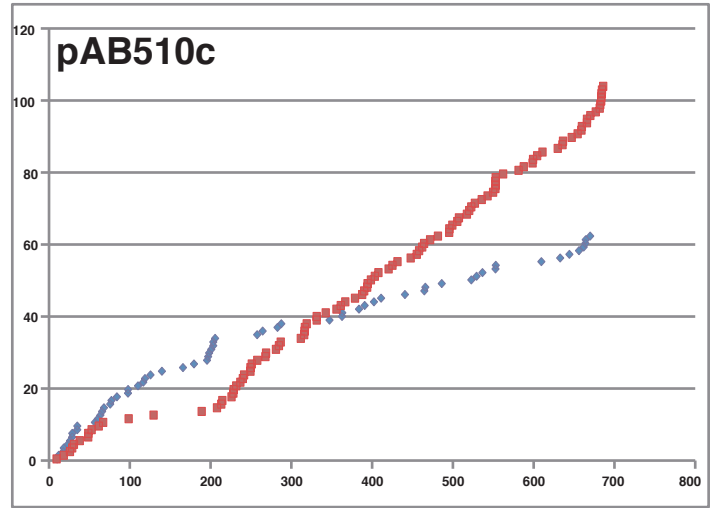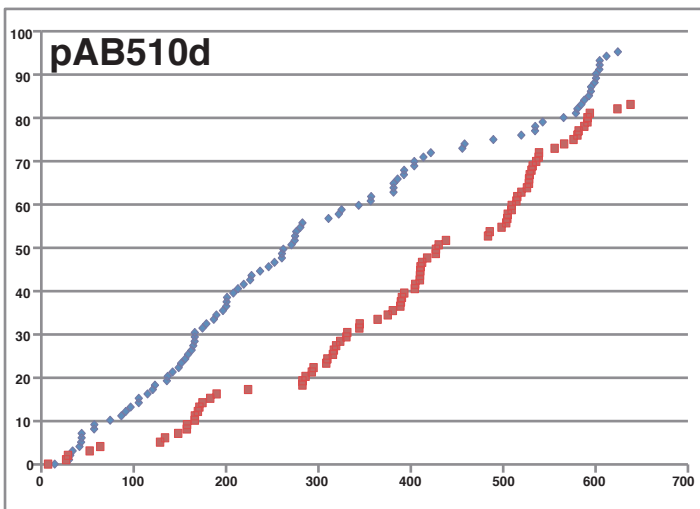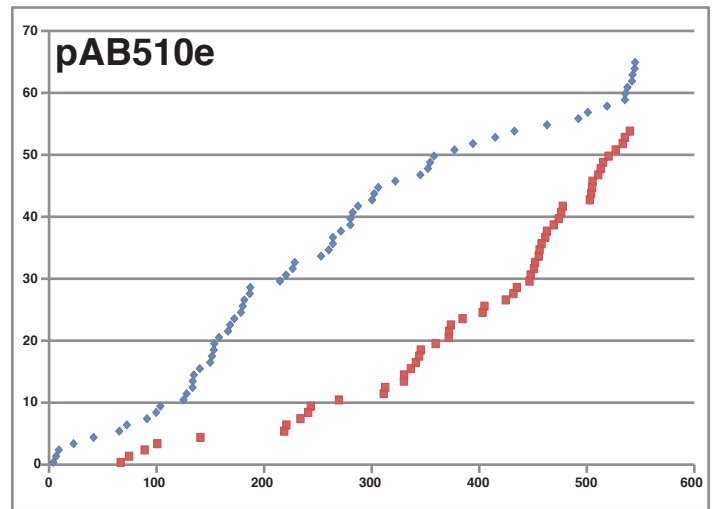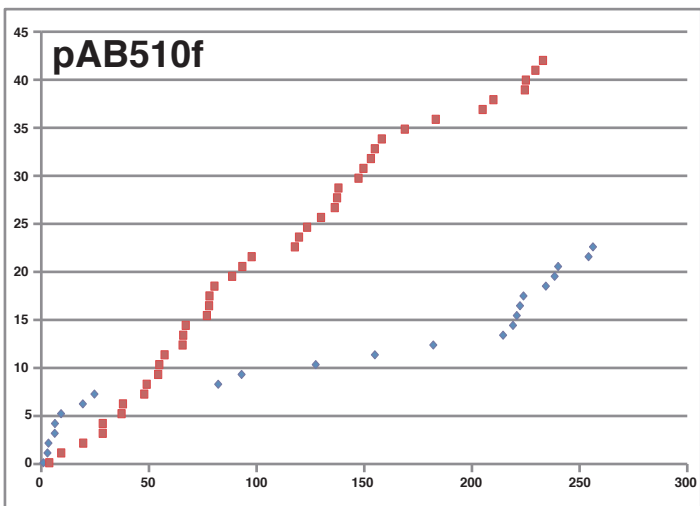

X: Nucleotides from putative origin (Kbp)  
 Y: Cumulative number of KOPS motifs  
 ◆ KOPS (F)  
 ■ KOPS (R)

Supplementary Figure 3

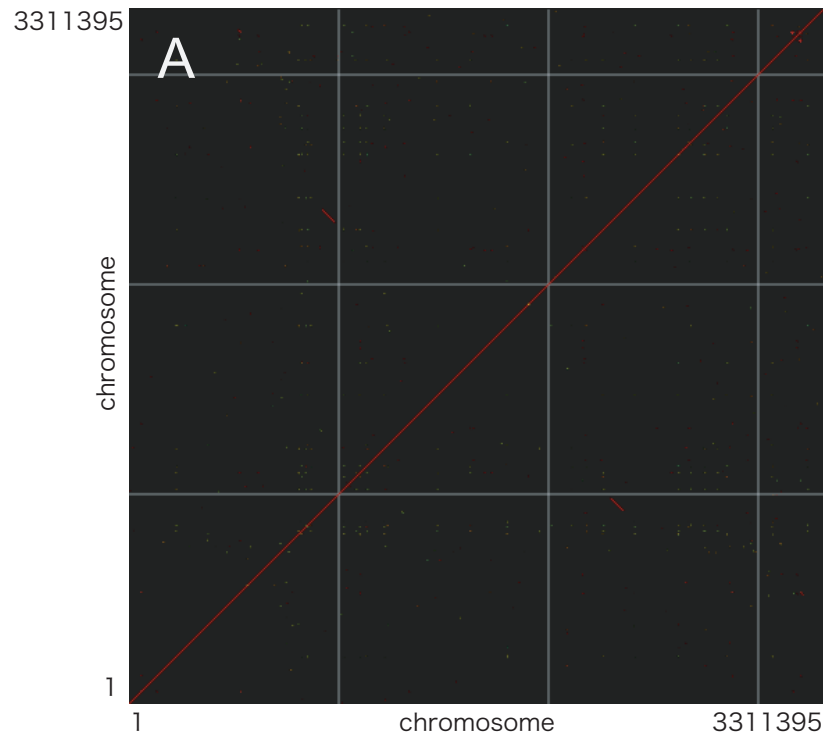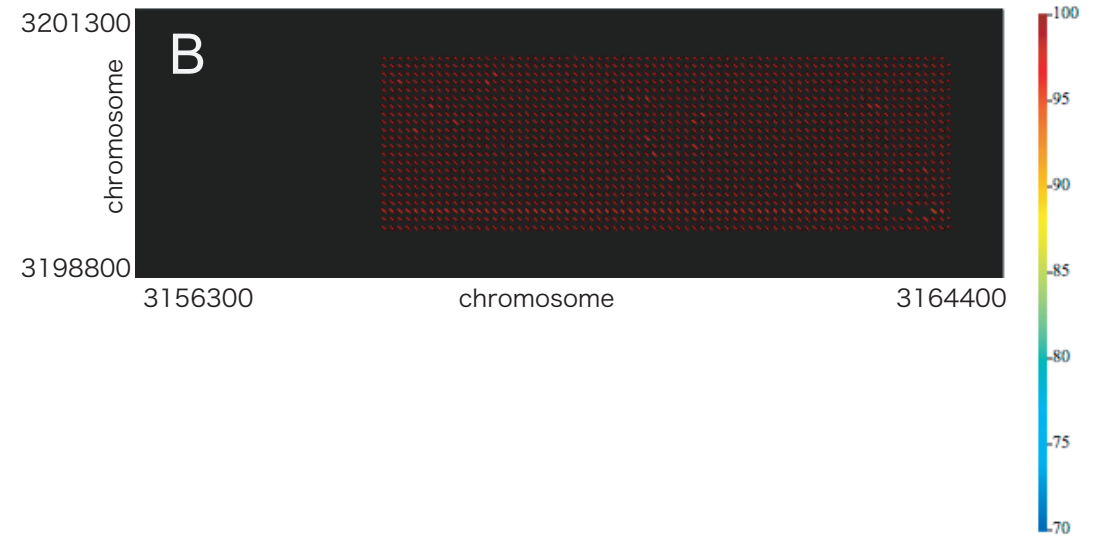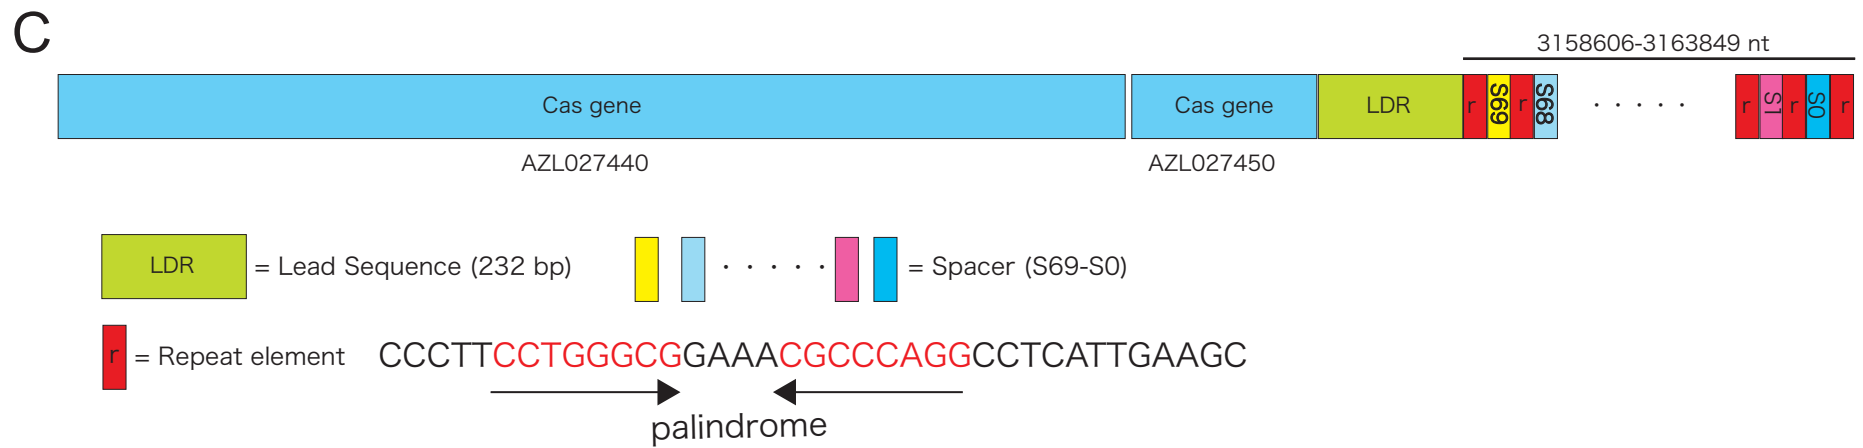

Supplementary Figure 4.



REPEAT  
(Arrow: palindrome)

SPACER

|         |                                      |                                            |         |
|---------|--------------------------------------|--------------------------------------------|---------|
| 3158606 | CCCTTCCTGGGCGGAAACGCCAGGCCTCATTGAAGC | TACATCTGCGACATCGTTGCGCTTCGCGGTGGCCCGT      |         |
| 3158680 | CCCTTCCTGGGCGGAAACGCCAGGCCTCATTGAAGC | CGGCAAGGATCGAGTTGCTAGCTCCGCGAAGGAGG        | 3158679 |
| 3158754 | CCCTTCCTGGGCGGAAACGCCAGGCCTCATTGAAGC | CGGCAAGGATCGAGTTGCTAGCTCCGCGAAGGAGG        | 3158753 |
| 3158830 | CCCTTCCTGGGCGGAAACGCCAGGCCTCATTGAAGC | CGGCAAGGATCGAGTTGCTAGCTCCGCGAAGGAGG        | 3158829 |
| 3158901 | CCCTTCCTGGGCGGAAACGCCAGGCCTCATTGAAGC | TCAGCGTCCTTAGGATCGTCCGTGAGAAGGTCGGCCAT     | 3158900 |
| 3158976 | CCCTTCCTGGGCGGAAACGCCAGGCCTCATTGAAGC | TGCAGGATGGACCCAACCTCGAACTGGAAGAGGCCG       | 3158975 |
| 3159049 | CCCTTCCTGGGCGGAAACGCCAGGCCTCATTGAAGC | CGGTCTGCCAAGTCCATGCGGGCGAAAGAGACGGAT       | 3159048 |
| 3159123 | CCCTTCCTGGGCGGAAACGCCAGGCCTCATTGAAGC | GTTCGGAAATATTGATCCGACCCCATTCGGATCAT        | 3159122 |
| 3159196 | CCCTTCCTGGGCGGAAACGCCAGGCCTCATTGAAGC | AGGCCCGCCGCGTGC TGGGCGCCTCCAATGTCGGACC     | 3159195 |
| 3159270 | CCCTTCCTGGGCGGAAACGCCAGGCCTCATTGAAGC | GGCGTCTGCCGTCTCCAGCCACTTCGCCAGCACTCC       | 3159269 |
| 3159343 | CCCTTCCTGGGCGGAAACGCCAGGCCTCATTGAAGC | GGGTGAAGCGGGGTGCTGGTAGGGGATGGGTGGTAG       | 3159342 |
| 3159418 | CCCTTCCTGGGCGGAAACGCCAGGCCTCATTGAAGC | CCCGCGGCACCGGATCGAGGGGCCGCGGCGCAACGGC      | 3159417 |
| 3159492 | CCCTTCCTGGGCGGAAACGCCAGGCCTCATTGAAGC | ATCACAATGAACGGCGAACCACCTCGCCCACCCTTG       | 3159491 |
| 3159565 | CCCTTCCTGGGCGGAAACGCCAGGCCTCATTGAAGC | AGGGCGCGGGGAGGGGGAGCGCCCCCATTCCTTCAGCC     | 3159564 |
| 3159641 | CCCTTCCTGGGCGGAAACGCCAGGCCTCATTGAAGC | GCCATGTCGCCGTCGTGCTGTGGTGTCAATCGTGTGCCACTT | 3159640 |
| 3159720 | CCCTTCCTGGGCGGAAACGCCAGGCCTCATTGAAGC |                                            | 3159719 |
| 3159794 | CCCTTCCTGGGCGGAAACGCCAGGCCTCATTGAAGC | TCAGTCGGTGCGGATACCGCCTTGGCGATCACAGAGACGG   | 3159793 |
| 3159871 |                                      |                                            | 3159870 |

|                                       |         |
|---------------------------------------|---------|
| CCCTTCCTGGGCGGAAACGCCCAGGCCTCATTGAAGC | 3159944 |
| 3159945                               |         |
| CCCTTCCTGGGCGGAAACGCCCAGGCCTCATTGAAGC | 3160018 |
| 3160019                               |         |
| CCCTTCCTGGGCGGAAACGCCCAGGCCTCATTGAAGC | 3160090 |
| 3160091                               |         |
| CCCTTCCTGGGCGGAAACGCCCAGGCCTCATTGAAGC | 3160164 |
| 3160165                               |         |
| CCCTTCCTGGGCGGAAACGCCCAGGCCTCATTGAAGC | 3160238 |
| 3160239                               |         |
| CCCTTCCTGGGCGGAAACGCCCAGGCCTCATTGAAGC | 3160313 |
| 3160314                               |         |
| CCCTTCCTGGGCGGAAACGCCCAGGCCTCATTGAAGC | 3160391 |
| 3160392                               |         |
| CCCTTCCTGGGCGGAAACGCCCAGGCCTCATTGAAGC | 3160464 |
| 3160465                               |         |
| CCCTTCCTGGGCGGAAACGCCCAGGCCTCATTGAAGC | 3160538 |
| 3160539                               |         |
| CCCTTCCTGGGCGGAAACGCCCAGGCCTCATTGAAGC | 3160612 |
| 3160613                               |         |
| CCCTTCCTGGGCGGAAACGCCCAGGCCTCATTGAAGC | 3160685 |
| 3160686                               |         |
| CCCTTCCTGGGCGGAAACGCCCAGGCCTCATTGAAGC | 3160760 |
| 3160761                               |         |
| CCCTTCCTGGGCGGAAACGCCCAGGCCTCATTGAAGC | 3160834 |
| 3160835                               |         |
| CCCTTCCTGGGCGGAAACGCCCAGGCCTCATTGAAGC | 3160907 |
| 3160908                               |         |
| CCCTTCCTGGGCGGAAACGCCCAGGCCTCATTGAAGC | 3160982 |
| 3160983                               |         |
| CCCTTCCTGGGCGGAAACGCCCAGGCCTCATTGAAGC | 3161057 |
| 3161058                               |         |
| CCCTTCCTGGGCGGAAACGCCCAGGCCTCATTGAAGC | 3161130 |
| 3161131                               |         |
| CCCTTCCTGGGCGGAAACGCCCAGGCCTCATTGAAGC | 3161204 |
| 3161205                               |         |
| CCCTTCCTGGGCGGAAACGCCCAGGCCTCATTGAAGC | 3161277 |
| 3161278                               |         |
| CCCTTCCTGGGCGGAAACGCCCAGGCCTCATTGAAGC | 3161354 |
| 3161355                               |         |

|                                      |                                         |
|--------------------------------------|-----------------------------------------|
| CCCTTCCTGGGCGGAAACGCCAGGCCTCATTGAAGC | 3161426                                 |
| 3161427                              |                                         |
| CCCTTCCTGGGCGGAAACGCCAGGCCTCATTGAAGC | CGGAGGGAAACCACCAGCCGAGCAACGTCGCTCGGCTTG |
| 3161503                              | 3161502                                 |
| CCCTTCCTGGGCGGAAACGCCAGGCCTCATTGAAGC | GACGCATGAAGTTCGTACCGGTGGCGTCCCGCATATC   |
| 3161579                              | 3161578                                 |
| CCCTTCCTGGGCGGAAACGCCAGGCCTCATTGAAGC | CCCTGCCACCCTGATCTGCAGCTTGTGCATGTCGAGCCG |
| 3161655                              | 3161654                                 |
| CCCTTCCTGGGCGGAAACGCCAGGCCTCATTGAAGC | CGCCGCTCTATGAGTTCGTGCCACGCGGTCCATCAGC   |
| 3161731                              | 3161730                                 |
| CCCTTCCTGGGCGGAAACGCCAGGCCTCATTGAAGC | TGGCCATGGTCTATGACAGGAACGCCCTGGCCCTGCA   |
| 3161807                              | 3161806                                 |
| CCCTTCCTGGGCGGAAACGCCAGGCCTCATTGAAGC | ATAAGAGGCTCTGGGCGGAAACGCCCTGGCCCTGCA    |
| 3161885                              | 3161884                                 |
| CCCTTCCTGGGCGGAAACGCCAGGCCTCATTGAAGC | GCCATTCCCTTGTGCTCTGGTCAAATGGGCAA        |
| 3161957                              | 3161956                                 |
| CCCTTCCTGGGCGGAAACGCCAGGCCTCATTGAAGC | TGCCATACAGGCCAGGACTTCAGACCTTCTGGGAAATC  |
| 3162034                              | 3162033                                 |
| CCCTTCCTGGGCGGAAACGCCAGGCCTCATTGAAGC | GACTCCCAACGGACGCTGACGAAATGGGCGCACGCGC   |
| 3162110                              | 3162109                                 |
| CCCTTCCTGGGCGGAAACGCCAGGCCTCATTGAAGC | TTGAACACTGCGGCGGAACACCCCATCGTGGTAACG    |
| 3162183                              | 3162182                                 |
| CCCTTCCTGGGCGGAAACGCCAGGCCTCATTGAAGC | AATGATATGGCTCTCTCGGGCTTCGTCAATGTAGACCC  |
| 3162258                              | 3162257                                 |
| CCCTTCCTGGGCGGAAACGCCAGGCCTCATTGAAGC | AGCAAGAATATGTGGATCGAAACATCCTCAATCTGAA   |
| 3162334                              | 3162333                                 |
| CCCTTCCTGGGCGGAAACGCCAGGCCTCATTGAAGC | AACTTCACGATCTCAATGGCTGTTTTGTCAATCAATAA  |
| 3162408                              | 3162407                                 |
| CCCTTCCTGGGCGGAAACGCCAGGCCTCATTGAAGC | AGCAGTCCAGCGGATGCGGCGGTGGTTGGACAACCGC   |
| 3162482                              | 3162481                                 |
| CCCTTCCTGGGCGGAAACGCCAGGCCTCATTGAAGC | AGCCCCAGGTAGCCCAGCTTGTAGGTCTGGCTGGCTTC  |
| 3162557                              | 3162556                                 |
| CCCTTCCTGGGCGGAAACGCCAGGCCTCATTGAAGC | CGGTCCGACAGGTGGCGCCCGACAGGTGGGCGCGC     |
| 3162630                              | 3162629                                 |
| CCCTTCCTGGGCGGAAACGCCAGGCCTCATTGAAGC | CCGGGTCAGGTTAGCCATGAGACGGCCATCCGGCA     |
| 3162703                              | 3162702                                 |
| CCCTTCCTGGGCGGAAACGCCAGGCCTCATTGAAGC | GACACAGACAGCAACAAGGCCACCTCATCGGGTGC     |
| 3162775                              | 3162774                                 |
| CCCTTCCTGGGCGGAAACGCCAGGCCTCATTGAAGC | SGTNTTGGCTCAGTTCCCAACGCTGCGGCATAATC     |
| 3162848                              | 3162847                                 |

|                                      |                                          |         |
|--------------------------------------|------------------------------------------|---------|
| CCCTTCCTGGGCGGAAACGCCAGGCCTCATTGAAGC | TCTACCGGCAGCAATGCCGGCAGATCCTGATCGGGG     | 3162920 |
| 3162921                              |                                          |         |
| CCCTTCCTGGGCGGAAACGCCAGGCCTCATTGAAGC | TGAATGCTGGGGCATCATGTCCGGCCGTATCCCGA      | 3162993 |
| 3162994                              |                                          |         |
| CCCTTCCTGGGCGGAAACGCCAGGCCTCATTGAAGC | CCGTGGAAAGTGACCGATCTGCGTTTGCTATGAACTGAG  | 3163069 |
| 3163070                              |                                          |         |
| CCCTTCCTGGGCGGAAACGCCAGGCCTCATTGAAGC | CGTCAACCCCAATCAGCCAGACCCTGGGTGCGGGCT     | 3163142 |
| 3163143                              |                                          |         |
| CCCTTCCTGGGCGGAAACGCCAGGCCTCATTGAAGC | TGAATGCGCATTGTGTTCTCCATTTCTCAGGCGGGCC    | 3163217 |
| 3163218                              |                                          |         |
| CCCTTCCTGGGCGGAAACGCCAGGCCTCATTGAAGC |                                          | 3163291 |
| 3163292                              |                                          |         |
| CCCTTCCTGGGCGGAAACGCCAGGCCTCATTGAAGC | AAATGGAGCGTCAGGCGCTCCAGGGGGAGCGGTCCGA    | 3163366 |
| 3163367                              |                                          |         |
| CTCTTCCTGGGCGGAAACGCCAGGCCTCATTGAAGC | CACAAGGCGATAGCGGCGCCCCAGCTCGGCCCGCG      | 3163438 |
| 3163439                              |                                          |         |
| CTCTTCCTGGGCGGAAACGCCAGGCCTCATTGAAGC | TTGCTTTCGCGCCCTGCGCCGTCATCCTTTGGGGCG     | 3163512 |
| 3163513                              |                                          |         |
| CCCTTCCTGGGCGGAAACGCCAGGCCTCATTGAAGC | AAATGCAGCGTCAGGCGCTCCAGGGGGAGCCGTCGGA    | 3163587 |
| 3163588                              |                                          |         |
| CTCTTCCTGGGCGGAAACGCCAGGCCTCATTGAAGC | CACAAGGCGATAGCGGCGCCCCAGCTCGGCCCGCG      | 3163659 |
| 3163660                              |                                          |         |
| CTCTTCCTGGGCGGAAACGCCAGGCCTCATTGAAGC | AAGGCAGTAGAGGCGCCGGCGGTCCGCTCCGCCGGAACAG | 3163736 |
| 3163737                              |                                          |         |
| CCCTTCCTGGGCGGAAACGCCAGGCCTCATTGAAGC | ACCTCCACCAGGTGTACTGCCGCAAAGTCTCGCCACC    | 3163812 |
| 3163813                              |                                          |         |
| CCCTTCCTGGGCGGAAACGCCAGGCCTCATTGAAGC |                                          |         |

Supplementary Figure 5



| Aminoacyl Stem  | D domain          |           | Anticodon domain                        |       | Variable region | TW domain |                       | Aminoacyl stem                    |
|-----------------|-------------------|-----------|-----------------------------------------|-------|-----------------|-----------|-----------------------|-----------------------------------|
|                 | stem              | loop      | stem                                    | loop  |                 | stem      | loop                  |                                   |
| <b>AZL_ra01</b> | <b>Type: Gln</b>  |           | <b>Anticodon: CTG (62973-63046)</b>     |       |                 |           |                       |                                   |
| TGGGGGA TC      | GTC               | AGCGGTA   | GGAC A                                  | GCGGA | CTCTGAC         | TCCGC     | CAGC                  | CTAGG TTCGAAT CCTAG TCCCCA ACCA   |
| <b>AZL_ra02</b> | <b>Type: Ser</b>  |           | <b>Anticodon: GCT (355389-355481)</b>   |       |                 |           |                       |                                   |
| GGAGGGG TG      | GCCG              | AGTGGCTGA | AGGC A                                  | ACGGT | TTGCTAA         | ACCGT     | CATAGGGTTTAAAGCCCTATC | GTGGG TTCGAAT CCCAT CCCCTCC GCCA  |
| <b>AZL_ra03</b> | <b>Type: Val</b>  |           | <b>Anticodon: CAC (410196-410270)</b>   |       |                 |           |                       |                                   |
| GGCGCGG TA      | GCTC              | AGCGGGA   | GAGC A                                  | TTCGC | TTCACAC         | GCGAA     | GGGTC                 | ACAGG TTCAACT CCTGT CGCGCCC ACCA  |
| <b>AZL_ra04</b> | <b>Type: Pro</b>  |           | <b>Anticodon: CGG (474014-474090)</b>   |       |                 |           |                       |                                   |
| CGGAGAG TA      | GCTC              | AGCCTGGTA | GAGC A                                  | CTGCT | TTCGGGA         | GGCAG     | GGGCC                 | GGAGG TTCGAAT CCTCT CTCTCCG ACCA  |
| <b>AZL_ra05</b> | <b>Type: Pro</b>  |           | <b>Anticodon: CGG (474308-474384)</b>   |       |                 |           |                       |                                   |
| CGGAGAG TA      | GCTC              | AGCCTGGTA | GAGC A                                  | CTGCT | TTCGGGA         | GGCAG     | GGGCC                 | GGAGG TTCGAAT CCTCT CTCTCCG ACCA  |
| <b>AZL_ra06</b> | <b>Type: Ser</b>  |           | <b>Anticodon: TGA (544324-544235)</b>   |       |                 |           |                       |                                   |
| GGATGGG TG      | GCCG              | AGTGGTTTA | AGGC A                                  | GCGGT | CTTGAAA         | ACCCG     | CGTAGGTGCGAGCCTACC    | GTGGG TTCGAAT CCCAC CCCATCC GCCA  |
| <b>AZL_ra08</b> | <b>Type: Ile</b>  |           | <b>Anticodon: GAT (566855-566931)</b>   |       |                 |           |                       |                                   |
| GGGCTAG TA      | GCTC              | AGTTGGTTA | GAGC G                                  | CGCGC | TTGATAA         | GCGTG     | AGGTC                 | GGAGG TTCAAAT CCTCC CTGGCCC ACCA  |
| <b>AZL_ra09</b> | <b>Type: Ala</b>  |           | <b>Anticodon: TGC (566961-567036)</b>   |       |                 |           |                       |                                   |
| GGGGCGG TA      | GCTC              | AGTTGGGA  | GAGC G                                  | CCTGC | TTTCAA          | GCAGG     | AGGTC                 | GTCGG TTCGATC CCGTC TGCCCTCC ACCA |
| <b>AZL_ra14</b> | <b>Type: fMet</b> |           | <b>Anticodon: CAT (971336-971260)</b>   |       |                 |           |                       |                                   |
| CGCGGGG TG      | GAGC              | AGCCCGGTA | GCTC G                                  | TCAGG | CTCATAA         | CCTGA     | AGGCC                 | GCAGG TTCAAAT CCTGC CCCCAC ACCA   |
| <b>AZL_ra17</b> | <b>Type: Ala</b>  |           | <b>Anticodon: TGC (974794-974719)</b>   |       |                 |           |                       |                                   |
| GGGGCCA TA      | GCTC              | AGTTGGGA  | GAGC G                                  | CCTGC | TTTCAA          | GCAGG     | AGGTC                 | GTCGG TTCGATC CCGTC TGCCCTCC ACCA |
| <b>AZL_ra18</b> | <b>Type: Ile</b>  |           | <b>Anticodon: GAT (974899-974823)</b>   |       |                 |           |                       |                                   |
| GGGCTAG TA      | GCTC              | AGTTGGTTA | GAGC G                                  | CGCGC | TTGATAA         | GCGTG     | AGGTC                 | GGAGG TTCAAAT CCTCC CTGGCC ACCA   |
| <b>AZL_ra20</b> | <b>Type: Arg</b>  |           | <b>Anticodon: CCG (1034101-1034025)</b> |       |                 |           |                       |                                   |
| GGACCCG TA      | GCTC              | AGCTGGATA | GAGC G                                  | CTGCC | CTCCGAA         | GGCAG     | AGGTC                 | ATGAG TTCGAAT CTCGT CGGGTC GCCA   |
| <b>AZL_ra23</b> | <b>Type: Ala</b>  |           | <b>Anticodon: TGC (1278873-1278798)</b> |       |                 |           |                       |                                   |
| GGGGCCA TA      | GCTC              | AGTTGGGA  | GAGC G                                  | CCTGC | TTTCAA          | GCAGG     | AGGTC                 | GTCGG TTCGATC CCGTC TGCCCTCC ACCA |
| <b>AZL_ra24</b> | <b>Type: Ile</b>  |           | <b>Anticodon: GAT (1278979-1278903)</b> |       |                 |           |                       |                                   |
| GGGCTAG TA      | GCTC              | AGTTGGTTA | GAGC G                                  | CGCGC | TTGATAA         | GCGTG     | AGGTC                 | GGAGG TTCAAAT CCTCC CTGGCCC ACCA  |
| <b>AZL_rb03</b> | <b>Type: Ala</b>  |           | <b>Anticodon: TGC (606446-606371)</b>   |       |                 |           |                       |                                   |
| GGGGCCA TA      | GCTC              | AGTTGGGA  | GAGC G                                  | CCTGC | TTTCAA          | GCAGG     | AGGTC                 | GTCGG TTCGATC CCGTC TGCCCTCC ACCA |
| <b>AZL_rb04</b> | <b>Type: Ile</b>  |           | <b>Anticodon: GAT (606563-606487)</b>   |       |                 |           |                       |                                   |
| GGGCTAG TA      | GCTC              | AGTTGGTTA | GAGC G                                  | CGCGC | TTGATAA         | GCGTG     | AGGTC                 | GGAGG TTCAAAT CCTCC CTGGCCC ACCA  |
| <b>AZL_rc01</b> | <b>Type: fMet</b> |           | <b>Anticodon: CAT (484080-484004)</b>   |       |                 |           |                       |                                   |
| CGCGGGG TG      | GAGC              | AGCCCGGTA | GCTC G                                  | TCAGG | CTCATAA         | CCTGA     | AGGCC                 | GCAGG TTCAAAT CCTGC CCCCAC ACCA   |
| <b>AZL_rc04</b> | <b>Type: Ala</b>  |           | <b>Anticodon: TGC (487527-487452)</b>   |       |                 |           |                       |                                   |
| GGGGCCA TA      | GCTC              | AGTTGGGA  | GAGC G                                  | CCTGC | TTTCAA          | GCAGG     | AGGTC                 | GTCGG TTCGATC CCGTC TGCCCTCC ACCA |
| <b>AZL_rc05</b> | <b>Type: Ile</b>  |           | <b>Anticodon: GAT (487644-487568)</b>   |       |                 |           |                       |                                   |
| GGGCTAG TA      | GCTC              | AGTTGGTTA | GAGC G                                  | CGCGC | TTGATAA         | GCGTG     | AGGTC                 | GGAGG TTCAAAT CCTCC CTGGCCC ACCA  |
| <b>AZL_rd01</b> | <b>Type: Asn</b>  |           | <b>Anticodon: GTT (271587-271662)</b>   |       |                 |           |                       |                                   |
| TCCCGGT TA      | GTC               | AGAGCCTA  | GGAC A                                  | GCGGA | CTGTAAA         | TCCGC     | TTGTC                 | GCTGG TTCGAT CACAG ACCGGGA GCCA   |
| <b>AZL_rd02</b> | <b>Type: Asp</b>  |           | <b>Anticodon: TGC (271667-271743)</b>   |       |                 |           |                       |                                   |
| GCGGGTG TA      | GCTC              | AGTTGGTTA | GAGC G                                  | CCGCG | CTGTAC          | GCCGG     | AGGCC                 | GCGGG TTCAGT CCGCT CACTCGC GCCA   |
| <b>AZL_rd03</b> | <b>Type: Phe</b>  |           | <b>Anticodon: GAA (419945-420020)</b>   |       |                 |           |                       |                                   |
| GCCCCAG TA      | GCTC              | AGTTGGTA  | GAGC A                                  | GGGGA | CTGAAA          | TCCCC     | GTGTC                 | GGCGG TTCAAAT CCGTC CCTGGCC ACCA  |
| <b>AZL_rd04</b> | <b>Type: Glu</b>  |           | <b>Anticodon: TTC (549351-549276)</b>   |       |                 |           |                       |                                   |
| GTCCCCG TC      | GTCT              | AGAGCCTA  | GGAC A                                  | CCGCC | CTTTAC          | GGCGG     | CGAC                  | ACGGG TTCGACT CCCGT CGGGGAC GCCA  |
| <b>AZL_rd05</b> | <b>Type: Glu</b>  |           | <b>Anticodon: CTC (549471-549396)</b>   |       |                 |           |                       |                                   |
| GTCCCCA TC      | GTCT              | AGAGCCTA  | GGAC A                                  | CCGCC | CTCTAC          | GGCGG     | TAAC                  | AGGGG TTCGACT CCCCT TGGGGAC GCCA  |
| <b>AZL_rd06</b> | <b>Type: Glu</b>  |           | <b>Anticodon: CTC (549614-549539)</b>   |       |                 |           |                       |                                   |
| GTCCCCA TC      | GTCT              | AGAGCCTA  | GGAC A                                  | CCGCC | CTCTAC          | GGCGG     | TAAC                  | AGGGG TTCGACT CCCCT TGGGGAC GCCA  |
| <b>AZL_re02</b> | <b>Type: Ile</b>  |           | <b>Anticodon: GAT (18041-18117)</b>     |       |                 |           |                       |                                   |
| GGGCTAG TA      | GCTC              | AGTTGGTTA | GAGC G                                  | CGCGC | TTGATAA         | GCGTG     | AGGTC                 | GGAGG TTCAAAT CCTCC CTGGCCC ACCA  |
| <b>AZL_re03</b> | <b>Type: Ala</b>  |           | <b>Anticodon: TGC (18147-18222)</b>     |       |                 |           |                       |                                   |
| GGGGCGG TA      | GCTC              | AGTTGGGA  | GAGC G                                  | CCTGC | TTTCAA          | GCAGG     | AGGTC                 | GTCGG TTCGATC CCGTC TGCCCTCC ACCA |
| <b>AZL_re06</b> | <b>Type: fMet</b> |           | <b>Anticodon: CAT (21600-21676)</b>     |       |                 |           |                       |                                   |
| CGCGGGG TG      | GAGC              | AGCCCGGTA | GCTC G                                  | TCAGG | CTCATAA         | CCTGA     | AGGCC                 | GCAGG TTCAAAT CCTGC CCCCAC ACCA   |
| <b>AZL_re07</b> | <b>Type: Tyr</b>  |           | <b>Anticodon: GTA (357234-357319)</b>   |       |                 |           |                       |                                   |
| GGAAGGG TG      | GCCG              | AGTGGTTAA | AGGC A                                  | GCAGA | CTGTAAA         | TCTGC     | CCGCGTACGCGTAC        | GCTGG TTCGAAT CCAGC CCCTCC ACCA   |
| <b>AZL_re08</b> | <b>Type: Val</b>  |           | <b>Anticodon: GAC (449596-449522)</b>   |       |                 |           |                       |                                   |
| GGTCTCG TA      | GCTC              | AGCGGGA   | GAGC A                                  | CTACG | TTGACAT         | CGTAG     | GGGTC                 | ACTGG TTCAACT CCAGT CCGGGAC ACCA  |
| <b>AZL_re09</b> | <b>Type: Gly</b>  |           | <b>Anticodon: GCC (449699-449625)</b>   |       |                 |           |                       |                                   |
| GCGGGCG TA      | GCTC              | AGGGGTA   | GAGC A                                  | CAACC | TTGCCAA         | GTTTG     | GGGTC                 | GAGGG TTCGAAT CCCTT GCGCCG TCCA   |
| <b>AZL_re10</b> | <b>Type: Asp</b>  |           | <b>Anticodon: GTC (449780-449704)</b>   |       |                 |           |                       |                                   |
| GCGGGTG TA      | GCTC              | AGTTGGTTA | GAGC G                                  | CCGCG | CTGTAC          | GCCGG     | AGGCC                 | GCGGG TTCAGT CCGCT CACTCGC GCCA   |
| <b>AZL_re11</b> | <b>Type: Ala</b>  |           | <b>Anticodon: GGC (449929-449854)</b>   |       |                 |           |                       |                                   |
| GGGGCCA TA      | GCTC              | AGTTGGGA  | GAGC G                                  | CTACA | ATGGCAT         | TGTAG     | AGGTC                 | AGGAG TTCGATC CCTCT TGCCCTCC ACCA |
| <b>AZL_re12</b> | <b>Type: Leu</b>  |           | <b>Anticodon: CAG (450054-449968)</b>   |       |                 |           |                       |                                   |
| GCCTGTG TG      | GCGG              | AATTGGTAG | ACGC G                                  | CTAGG | TTCAGT          | CCTAG     | TGGCTGAAAGCCGT        | GGGGG TTCGATC CCTCT CAAGCGC ACCA  |

Supplementary Figure 6.

variation1 (*rrn2, rrn3, rrn6, rrn9*)

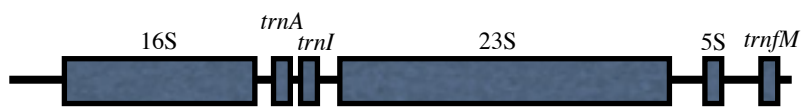

variation2 (*rrn1, rrn4, rrn7, rrn8*)

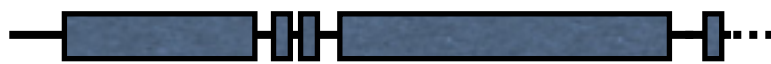

variation3 (*rrn5*)

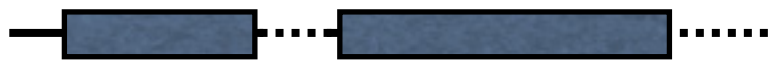

5' (471791)

TCAGAAATCCAGCATCGCGTTGTCGATCACCTCCTTCATGACGAAGAAGGTGCGGTCTGCCGCACGCCGGAAGCGCGATCAGTTGCTGCCCGTGCAG  
ACGGTTGAAATCCGCGATGTCGCTGACCCGGATCTTCAGGAAGAAATCGAAGTCCCCGGCGACGAGATGACAGTCCAGCACGAAGGGCAGCTTGGGAT  
CGCCTGCTCGAACCGCGCGAAGCTTCCGGCGTCGAGCGGTCCAACCTCGACCCCGACCATACCAGCGTGCCCGATCCACCTTCGCCGGCTCGATCTC  
GGCCCGGACGGAACGGATGTAGCCCTCGGCGAAAAGCCGTTGGGTGTGCCGGTGGCAGGTGGCCGGGCTGAGATTACCCGCCGCCAGATCGGCGTT  
CGTCATCCGGCCATCCCTTTGAAGAAGCTGGAGAATCTTGGGTGCGCCGGGCTGGGCCCTCATCGGCGGTGGTTTCTCATTTTCATCCATGAATT  
TGGGATGGATAGCGCACAAAATGGCATTTATCAGCCTGAAACAGCAATCCGATAGCGAAGTTTGAGAGCACCTTTCATTTCTACGGTGATACCGTCCG  
TTCACTTGAGACAGTGGAGCCCCGCCATGCTGCGCCTCGATCGCTTCGAACGTTATCCGCTCACCTTCGGCCCGACTCCCATCGAACATCTGCCCCGCC  
TGACCGAGGCGCTCGGCGGCAAGGTCGAGATCTACGCCAAGCGCGACGACTGCAACTCCGGCCTCGCCATGGGCGGCAACAAGCTGCGCAAGCTGGAAT  
ACATCGTTCCCGACGCCATCGCGGCCGGCGCCGACACGCTGGTGTCCATCGGCGGCGTGCAAGTCAACACACCCGCATGGTGGCGGCCACCGCCGCA  
AGCTCGGCATGAAGTGCCTGGTGCAGGAGAGCTGGGTTCCGCACGAGGACGCCGTCTATGACCGCGTCGGCAACATCCTGCTGACCCGCTGATGG  
GCGCCGACAGCCGCATCGTTTCCGACGGCTTCGACATCGGCATCCGCAAGAGCTGGGAGGACGCCATCCAGTCGGTGAAGGATGTCGGCGGCAAGCCCT  
ACGGCATTCCGGCCGGCGGCTCCGTCCACAAATACGGCGGTCTCGGCTATGTCGGCTTCGCCGAGGAGGTCCGCAAGCAGGAGGCCGAGCTCGGCTTCA  
AGTTCGACTACATCGTCTGCTGCTGACCGGCTCGACCCAGGGCGGCATGATCGTTCGGCTTCGCCGCCGACGACCGCGCCGACCGCGTGATCGGCA  
TCGACGCCTCCGGCACGCCGGAACAGACCCGCGCCAGGTCCGCCAGATCGTCGACAACACGGCCGAGCTGGTTCGAACTCGGCCGCAAGGTCCGCGACG  
ACGAGATCGTCATCCTGGAAGACTATGCCTATCCGGCCTATGGCGTGCCAGCGCCGAGACCAACGAGGCGATCCGCCTGGCCGCCCGCACCAGGCGCA  
TGATCACCGACCCGGTCTATGAGGGCAAGTCGATGCAGGGCATGATCGACCTCGTGAAGAAGGGCTGGTTCCCCGAAGGCTCGAAGGTCCTCTACGCC  
ATCTCGGCGGCGCCCCGGCGCTGAACGGCTACAGCTACACCTACCGGAACGGCTGA-3' (470631)

Supplementary Figure 8



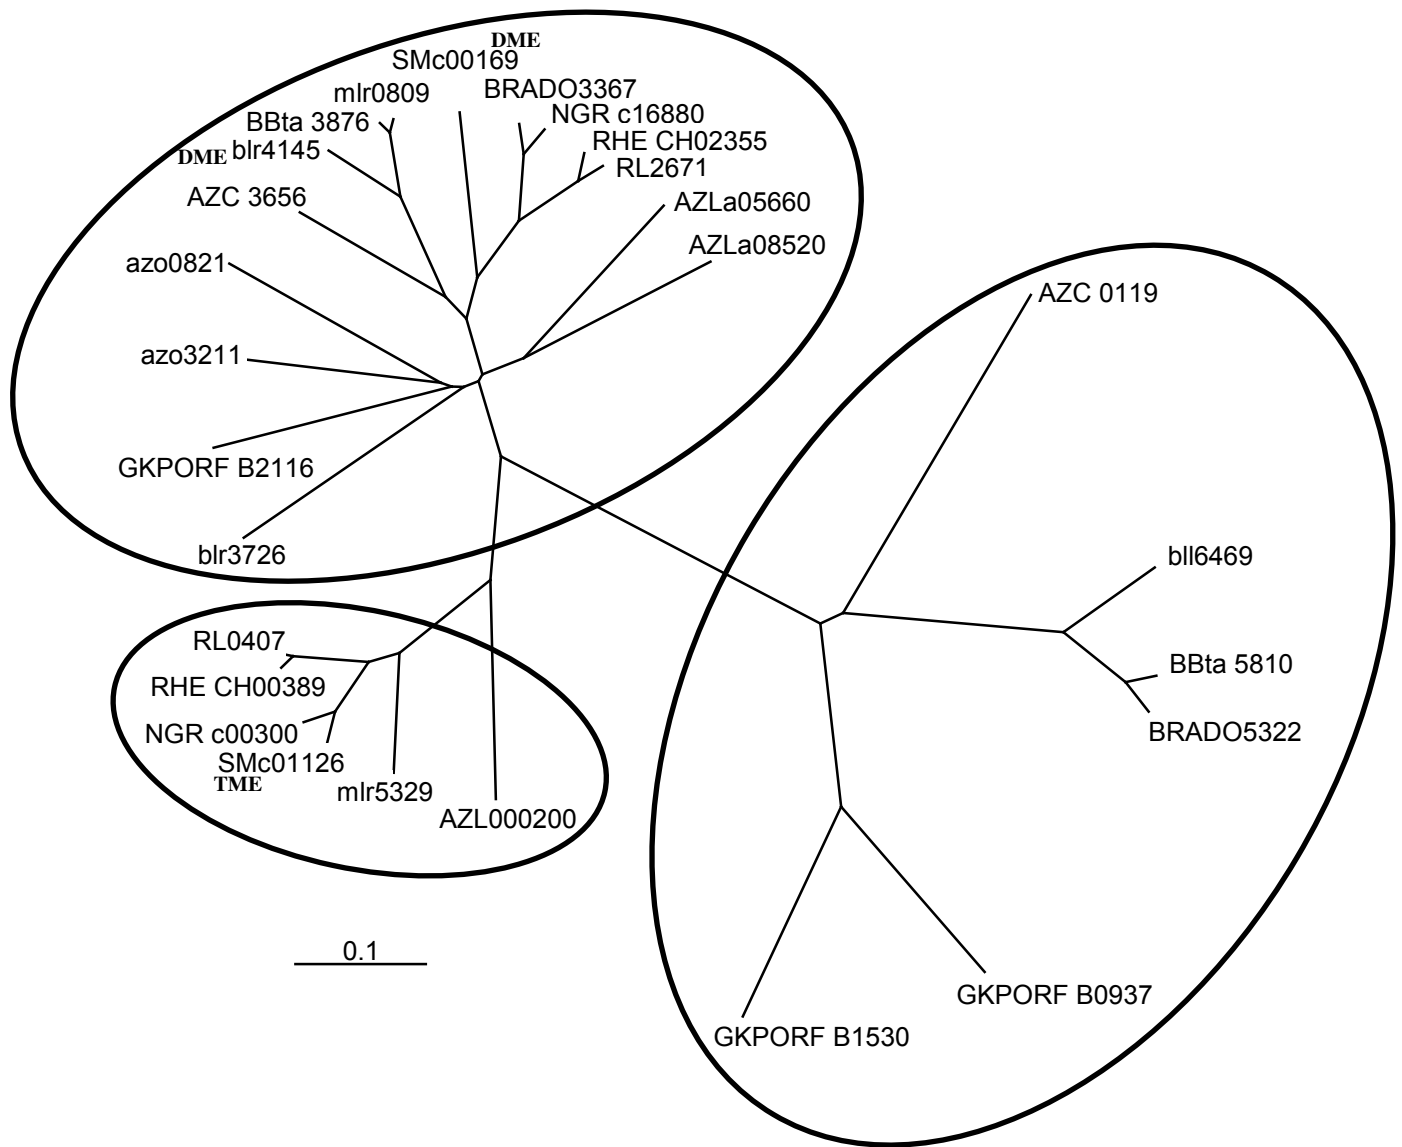

Supplementary Figure 9

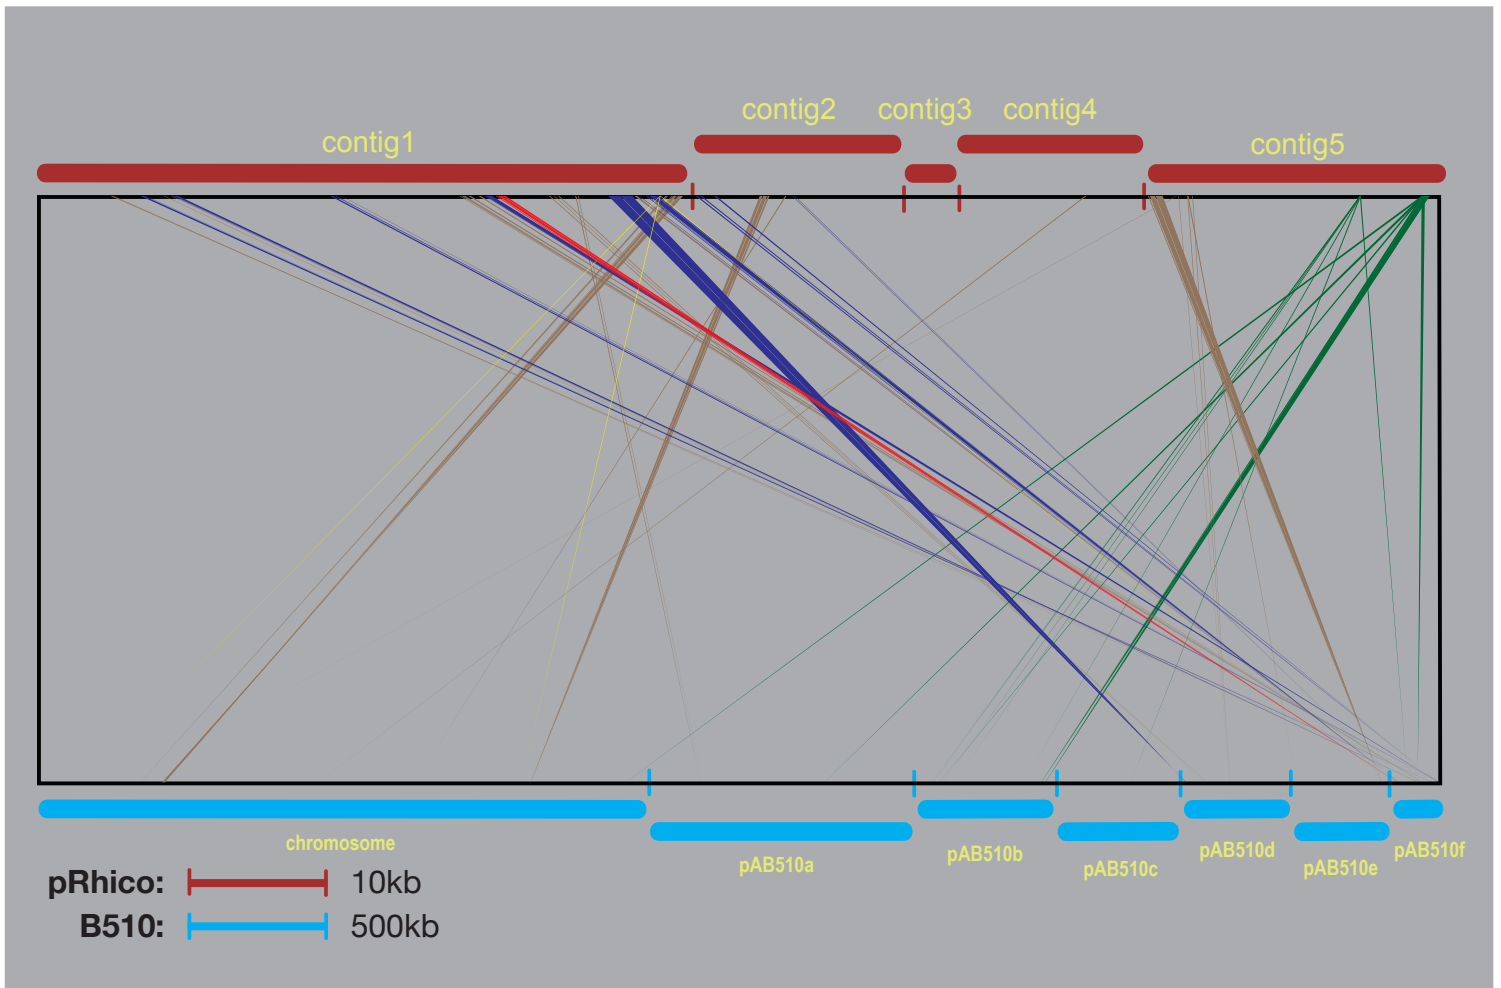

Supplementary Figure 10
