# Supplementary material for: Complete Genomic Structure of the Cultivated Rice Endophyte Azospirillum sp. B510
Source: PubMed Central journal article supplement — DNA Res. 2010 Jan 4;17(1):37–50. doi: 10.1093/dnares/dsp026 (PMC2818188; doi:10.1093/dnares/dsp026), 2010-01-04
Supplement: dsp026_2.pdf [file dsp026_2.pdf]

Supplementary Table 2 Structural features of insertion sequences

| name    | family <sup>a)</sup> | size <sup>b)</sup> | complete <sup>c)</sup> | partial <sup>c)</sup> |
|---------|----------------------|--------------------|------------------------|-----------------------|
| ISazl01 | IS3                  | (1169)             | 0                      | 6                     |
| ISazl02 | IS3                  | 1602               | 4                      | 15                    |
| ISazl03 | IS3                  | (964)              | 0                      | 15                    |
| ISazl04 | IS5                  | 852                | 13                     | 1                     |
| ISazl05 | IS5                  | 936                | 8                      | 7                     |
| ISazl06 | IS5                  | 1312               | 9                      | 1                     |
| ISazl07 | IS5                  | (567)              | 0                      | 3                     |
| ISazl08 | IS21                 | 2610               | 19                     | 1                     |
| ISazl09 | IS66                 | 2633               | 2                      | 14                    |
| ISazl10 | IS66                 | 2811               | 3                      | 13                    |
| ISazl11 | IS66                 | (653)              | 0                      | 2                     |
| ISazl12 | IS66                 | 3233               | 2                      | 5                     |
| ISazl13 | IS110                | 1511               | 3                      | 6                     |
| ISazl14 | IS256                | (1043)             | 0                      | 5                     |
| ISazl15 | IS256                | (484)              | 0                      | 6                     |
| ISazl16 | IS256                | 1417               | 3                      | 9                     |
| ISazl17 | IS630                | 1180               | 9                      | 4                     |
| ISazl18 | IS701                | (1119)             | 0                      | 2                     |
| ISazl19 | IS701                | 1388               | 8                      | 2                     |
| ISazl20 | IS1380               | (1169)             | 0                      | 2                     |
| ISazl21 | IS1380               | 1620               | 27                     | 4                     |
| ISazl22 | ISAs1                | 1334               | 7                      | 4                     |
| ISazl23 | ISAs1                | 1225               | 6                      | 1                     |
| ISazl24 | ISAs1                | 1263               | 5                      | 0                     |
| ISazl25 | ISAs1                | 1270               | 4                      | 3                     |
| ISazl26 | ISAs1                | 1196               | 5                      | 3                     |
| ISazl27 | ISL3                 | 1866               | 2                      | 3                     |
| ISazl28 | ISNCY                | (545)              | 0                      | 2                     |
| ISazl29 | ISNCY                | (539)              | 0                      | 2                     |

<sup>a)</sup> Classification into IS family was subjected based on similarity of each transposase with the assistance of the ISFinder database. <sup>b)</sup> Size of intact IS are indicated with bp. For no intact, truncated ISs species, the figures of longest partial fragment are shown in parenthesis. <sup>c)</sup> Numbers of classified ISs are shown.
