# Supplementary material for: Complete Genomic Structure of the Cultivated Rice Endophyte Azospirillum sp. B510
Source: PubMed Central journal article supplement — DNA Res. 2010 Jan 4;17(1):37–50. doi: 10.1093/dnares/dsp026 (PMC2818188; doi:10.1093/dnares/dsp026), 2010-01-04
Supplement: dsp026_3.pdf [file dsp026_3.pdf]

Supplementary Table 4 List of the genomic elements inserted in tRNA genes.

| name <sup>a)</sup> | tRNA gene species               | length (bp) | position               | GC (%) | duplication (bp) | integrase gene_ID       |
|--------------------|---------------------------------|-------------|------------------------|--------|------------------|-------------------------|
| B510GI01           | <i>trnG</i> -CCC                | 12447       | 51,826 to 64,272       | 66.8   | 46               | AZL000520               |
| B510GI02           | <i>trnK</i> -UUU                | 13189       | 1,582,317 to 1,595,505 | 65.6   | 48               | AZL013810               |
| B510GI03           | <i>trnQ</i> -UUG                | 6718        | 1,692,559 to 1,699,276 | 57.4   | 20               | AZL014720               |
| B510GI04           | <i>trnV</i> -UAC                | 19768       | 2,157,689 to 2,177,456 | 63.7   | 44               | AZL018910               |
| B510GI05           | <i>trnL</i> -CAA                | 7012        | 2,873,223 to 2,880,234 | 65.3   | 25 <sup>c)</sup> | AZL025210               |
| B510GI06           | <i>trnT</i> -CGU                | 36086       | 2,883,779 to 2,919,864 | 66.5   | 46               | AZL025570               |
| B510GI07           | <i>trnF</i> -GAA                | 22553       | 420,021 to 442,573     | 53.1   | 46 <sup>c)</sup> | AZLd03710               |
| B510GI08           | <i>trnfM</i> -CAU <sup>b)</sup> | 70994       | 21,677 to 92,670       | 64.4   | 21               | AZLe00130 <sup>d)</sup> |

<sup>a)</sup> Genomic islands numbered 01 to 06 were assigned on the chromosome. d7 and e8 were on the plasmid, pAB510d and pAB510e, respectively. <sup>b)</sup> The gene for *trnfM* is just located at the tail of an rRNA gene cluster on the pAB510e. <sup>c)</sup> Imperfect match sequence patterns were detected.

<sup>d)</sup> Site-specific recombinase homolog. It doesn't show similarity to any integrases.
