# Supplementary material for: Complete Genomic Structure of the Cultivated Rice Endophyte Azospirillum sp. B510
Source: PubMed Central journal article supplement — DNA Res. 2010 Jan 4;17(1):37–50. doi: 10.1093/dnares/dsp026 (PMC2818188; doi:10.1093/dnares/dsp026), 2010-01-04
Supplement: dsp026_4.pdf [file dsp026_4.pdf]

Supplementary Table 5 Codon-anticodon recognition pattern for the *Azospirillum* sp. B510 genome.

|       |                                                    |       |                                                           |       |                                                 |       |                                        |
|-------|----------------------------------------------------|-------|-----------------------------------------------------------|-------|-------------------------------------------------|-------|----------------------------------------|
| UUU F | <b><i>trnF-GAA</i></b> <i>d</i>                    | UCU S | <b><i>trnS-GGA</i></b> <i>Chr</i>                         | UAU Y | <b><i>trnY-GUA</i></b> <i>Chr,e</i>             | UGU C | <b><i>trnC-GCA</i></b> <i>Chr</i>      |
| UUC F |                                                    | UCC S |                                                           | UAC Y |                                                 | UGC C |                                        |
| UUA L | <b><i>trnL-UAA</i></b> <i>Chr</i>                  | UCA S | <b><i>trnS-UGA</i></b> <i>a</i>                           | UAA - |                                                 | UGA - |                                        |
| UUG L | <b><i>trnL-CAA</i></b> <i>Chr</i>                  | UCG S | <b><i>trnS-CGA</i></b> <i>Chr</i>                         | UAG - |                                                 | UGG W | <b><i>trnW-CCA</i></b> <i>Chr</i>      |
| CUU L | <b><i>trnL-GAG</i></b> <i>Chr</i>                  | CCU P | <b><i>trnP-GGG</i></b> <i>Chr</i>                         | CAU H | <b><i>trnH-GUG</i></b> <i>Chr</i>               | CGU R | <b><i>trnR-ACG</i></b> <i>Chr(2)</i>   |
| CUC L |                                                    | CCC P |                                                           | CAC H |                                                 | CGC R |                                        |
| CUA L | <b><i>trnL-UAG</i></b> <i>Chr</i>                  | CCA P | <b><i>trnP-UGG</i></b> <i>Chr</i>                         | CAA Q | <b><i>trnQ-UUG</i></b> <i>Chr</i>               | CGA R | <b><i>trnR-CCG</i></b> <i>a</i>        |
| CUG L | <b><i>trnL-CAG</i></b> <i>Chr(2),e</i>             | CCG P | <b><i>trnP-CGG</i></b> <i>a(2)</i>                        | CAG Q | <b><i>trnQ-CUG</i></b> <i>a</i>                 | CGG R |                                        |
| AUU I | <b><i>trnI-GAU</i></b> <i>Chr(2)</i>               | ACU T | <b><i>trnT-GGU</i></b> <i>Chr(2)</i>                      | AAU N | <b><i>trnN-GUU</i></b> <i>Chr,d</i>             | AGU S | <b><i>trnS-GCU</i></b> <i>a</i>        |
| AUC I | <i>a(3),b,c,e</i>                                  | ACC T |                                                           | AAC N |                                                 | AGC S |                                        |
| AUA I | <b><i>trnI-CAU</i></b> <i>Chr</i>                  | ACA T | <b><i>trnT-UGU</i></b> <i>Chr</i>                         | AAA K | <b><i>trnK-UUU</i></b> <i>Chr</i>               | AGA R | <b><i>trnR-UCU</i></b> <i>Chr</i>      |
| AUG M | <b><i>trnM-CAU</i></b> <i>Chr</i>                  | ACG T | <b><i>trnT-CGU</i></b> <i>Chr</i>                         | AAG K | <b><i>trnK-CUU</i></b> <i>Chr(2)</i>            | AGG R | <b><i>trnR-CCU</i></b> <i>Chr</i>      |
|       | <b><i>trnM-CAU</i></b> <i>Chr,</i><br><i>a,c,e</i> |       |                                                           |       |                                                 |       |                                        |
| GUU V | <b><i>trnV-GAC</i></b> <i>Chr,e</i>                | GCU A | <b><i>trnA-GGC</i></b> <i>Chr(2),e</i>                    | GAU D | <b><i>trnD-GUC</i></b> <i>Chr</i><br><i>d,e</i> | GGU G | <b><i>trnG-GCC</i></b> <i>Chr(2),e</i> |
| GUC V |                                                    | GCC A |                                                           | GAC D |                                                 | GGC G |                                        |
| GUA V | <b><i>trnV-UAC</i></b> <i>Chr</i>                  | GCA A | <b><i>trnA-UGC</i></b> <i>Chr(2)</i><br><i>a(3),b,c,e</i> | GAA E | <b><i>trnE-UUC</i></b> <i>Chr,d</i>             | GGA G | <b><i>trnG-UCC</i></b> <i>Chr</i>      |
| GUG V | <b><i>trnV-CAC</i></b> <i>a</i>                    | GCG A | <b><i>trnA-CGC</i></b> <i>Chr</i>                         | GAG E | <b><i>trnE-CUC</i></b> <i>d(2)</i>              | GGG G | <b><i>trnG-CCC</i></b> <i>Chr</i>      |

Corresponding amino acids for tRNA species are given as a one-letter abbreviation. “*Chr*” shows tRNA encoding on the chromosome, “*a*” is pAB510a, “*b*” is pAB510b, “*c*” is pAB510c, “*d*” is pAB510d and “*e*” is pAB510e. Numerals in parentheses indicate the number of the genes on the chromosome.
