# Supplementary material for: Complete Genomic Structure of the Cultivated Rice Endophyte Azospirillum sp. B510
Source: PubMed Central journal article supplement — DNA Res. 2010 Jan 4;17(1):37–50. doi: 10.1093/dnares/dsp026 (PMC2818188; doi:10.1093/dnares/dsp026), 2010-01-04
Supplement: dsp026_5.pdf [file dsp026_5.pdf]

Supplementary Table 6 List of tandem genes for tRNA, except for ones in *rrn* cluster

| tRNA                                    | gene ID             | direction | location (bp)     |
|-----------------------------------------|---------------------|-----------|-------------------|
| chromosome                              |                     |           |                   |
| <i>trnY - trnG</i>                      | AZLr013,14          | +         | 647024 - 647248   |
| <i>trnC - trnN</i>                      | AZLr020,19          | -         | 1491932 - 1492312 |
| <i>trnK - trnK*</i>                     | AZLr033,32          | -         | 2467062 - 2467137 |
| <i>trnT - trnT*</i>                     | AZLr034,35          | +         | 2529479 - 2529664 |
| <i>trnL - trnA</i>                      | AZLr038,37          | -         | 2637659 - 2637859 |
| pAB510a                                 |                     |           |                   |
| <i>trnP - trnP*</i>                     | AZLra04,05          | +         | 474014 - 474384   |
| pAB510d                                 |                     |           |                   |
| <i>trnN - trnD</i>                      | AZLrd01,02          | +         | 271587 - 271743   |
| <i>trnE - trnE - trnE**</i>             | AZLrd04,05,06       | +         | 549276 - 549614   |
| pAB510e                                 |                     |           |                   |
| <i>trnL - trnA - trnD - trnG - trnV</i> | AZLre12,11,10,09,08 | -         | 449522 - 450054   |

\* complete duplication

\*\* duplication including mismatches
